**Combined physical and cognitive training for older adults with and without cognitive impairment: A systematic review and network meta-analysis of randomized controlled trials**

Hanna Malmberg Gavelin<sup>1,2</sup>, Christopher Dong<sup>1</sup>, Ruth Minkov<sup>1</sup>, Alex Bahar-Fuchs<sup>1</sup>, Kathryn A Ellis<sup>1,3,4</sup>, Nicola T Lautenschlager<sup>1,5</sup>, Maddison L Mellow<sup>6</sup>, Alexandra T Wade<sup>6</sup>, Ashleigh E Smith<sup>6</sup>, Carsten Finke<sup>7,8</sup>, Stephan Krohn<sup>7,8</sup>, Amit Lampit<sup>1,7,8\*</sup>

*In Press, Ageing Research Reviews*

<sup>1</sup> Academic Unit for Psychiatry of Old Age, Department of Psychiatry, The University of Melbourne, Melbourne, Victoria, Australia

<sup>2</sup> Department of Psychology, Umeå University, Umeå, Sweden

<sup>3</sup> Melbourne School of Psychological Sciences, The University of Melbourne, Melbourne, Victoria, Australia

<sup>4</sup> Florey Institute for Neuroscience and Mental Health, The University of Melbourne, Melbourne, Victoria, Australia

<sup>5</sup> NorthWestern Mental Health, Melbourne Health, Melbourne, Victoria, Australia

<sup>6</sup> Alliance for Research in Exercise Nutrition and Activity (ARENA), Allied Health and Human Performance, University of South Australia, Adelaide, South Australia, Australia

<sup>7</sup> Department of Neurology, Charité-Universitätsmedizin Berlin, Berlin, Germany

<sup>8</sup> Berlin School of Mind and Brain, Humboldt-Universität zu Berlin, Berlin, Germany

\*Correspondence concerning this article should be addressed to Amit Lampit, [amit.lampit@unimelb.edu.au](mailto:amit.lampit@unimelb.edu.au).

## Abstract

Combining physical exercise with cognitive training is a popular intervention in dementia prevention trials and guidelines. However, it remains unclear what combination strategies are most beneficial for cognitive and physical outcomes. We aimed to compare the efficacy of the three main types of combination strategies (simultaneous, sequential or exergaming) to either intervention alone or control in older adults. Randomized controlled trials of combined cognitive and physical training were included in multivariate and network meta-analyses. In cognitively healthy older adults and mild cognitive impairment, the effect of any combined intervention relative to control was small and statistically significant for overall cognitive ( $k=41$ , Hedges'  $g = 0.22$ , 95% CI 0.14 to 0.30) and physical function ( $k=32$ ,  $g = 0.25$ , 95% CI 0.13 to 0.37). Simultaneous training was the most efficacious approach for cognition, followed by sequential combinations and cognitive training alone, and significantly better than physical exercise. For physical outcomes, simultaneous and sequential training showed comparable efficacy as exercise alone and significantly exceeded all other control conditions. Exergaming ranked low for both outcomes. Our findings suggest that simultaneously and sequentially combined interventions are efficacious for promoting cognitive alongside physical health in older adults, and therefore should be preferred over implementation of single-domain training.

**Keywords:** network meta-analysis, older adults, combined intervention, cognitive training, physical exercise, cognition

## 1 **1. Introduction**

2 As population ageing increases globally, cognitive impairment and dementia have  
3 become a leading cause of disability (World Health Organization and Alzheimer's Disease  
4 International, 2012). Modifiable risk factors such as physical and cognitive inactivity,  
5 depression, social isolation and poor cardiovascular health have been estimated to account for  
6 about 40% of the risk for developing dementia across the lifespan (Livingston et al., 2020b, a)  
7 and are recognized as important targets for non-pharmacological interventions aiming to prevent  
8 or delay cognitive decline. Multimodal intervention strategies have received particular interest,  
9 with over a dozen ongoing trials testing the assumption that targeting multiple risk factors would  
10 lead to additive or even synergetic effects on preserving functional independence in older age  
11 (Kivipelto et al., 2020).

12 Recent systematic reviews have supported the efficacy of cognitive training (Gavelin et  
13 al., 2020; Hill et al., 2017; Lampit et al., 2014; Leung et al., 2015) and physical exercise (Falck  
14 et al., 2019; Northey et al., 2018) on cognitive performance in older adults with and without  
15 cognitive impairment. These interventions have also been recommended in clinical practice  
16 guidelines (e.g., for mild cognitive impairment; Petersen et al., 2018) and, increasingly, the  
17 possibility of combining physical exercise with cognitively challenging activities has been  
18 highlighted as a way to maintain both cognitive and physical health (Yang et al., 2019).

19 Previous systematic reviews and meta-analyses have reported cognitive benefits  
20 following combined cognitive and physical interventions in older adults with or without  
21 cognitive impairment (Gheysen et al., 2018; Karssemeijer et al., 2017; Stanmore et al., 2017;  
22 Zhu et al., 2016), suggesting efficacy over and above physical exercise alone, and comparable to  
23 that of cognitive training. However, these meta-analyses mixed older with younger populations

24 (Stanmore et al., 2017) and randomized controlled trials (RCT) with other designs (Gheysen et  
25 al., 2018; Zhu et al., 2016) or included a combination of cognitive training and other cognition-  
26 oriented treatments, such as cognitive stimulation or non-specific cognitive activities  
27 (Karssemeijer et al., 2017). Furthermore, most meta-analyses have so far focused on cognitive  
28 outcomes (Gheysen et al., 2018; Stanmore et al., 2017; Zhu et al., 2016) and the efficacy of  
29 combined interventions on physical and everyday function in general, and compared to more  
30 traditional physical exercise interventions in particular, is not yet established.

31 A key outstanding question in the field is how the efficacy of combined physical and  
32 cognitive interventions is related to the mode of delivery. Combined interventions can be broadly  
33 divided into sequential or simultaneous designs. Sequential designs deliver the intervention  
34 modalities in separate sessions, usually during the same period (Ngandu et al., 2015) or, less  
35 commonly, on separate periods throughout the course of the intervention (Heffernan et al.,  
36 2019). Simultaneous interventions are usually based on either delivery of cognitive training  
37 while asking participants to exercise at the same time, or by using exergaming, i.e., physically  
38 active videogames that include cognitively challenging tasks (see definitions under 2.3.3. *Types*  
39 *of interventions* below).

40 While previous meta-analyses have provided some indications that simultaneous training  
41 leads to larger effects on cognition than those of sequential designs (Gheysen et al., 2018; Zhu et  
42 al., 2016), results have so far been inconclusive. Importantly, this question is difficult to  
43 ascertain in pairwise meta-analysis, since the relative efficacy of combined interventions is likely  
44 to be influenced by the type of control group activity (i.e., cognitive training or physical exercise  
45 alone, active or passive control), which varies considerably across studies (Gheysen et al., 2018;  
46 Zhu et al., 2016). In this context, network meta-analysis can be used to compare efficacy

47 estimates of the different delivery formats to single modality or other types of control conditions.  
48 Such an approach has been conducted in one previous systematic review (Bruderer-Hofstetter et  
49 al., 2018); however, due to the large number of treatment nodes and relatively small number of  
50 included studies, the precision of the effect estimates was limited and the quality of the evidence  
51 was rated as very low. Finally, the efficacy of exergaming in older adults is still unclear due to  
52 the limitations noted above as well as a recent re-analysis of Stanmore et al. (2017), suggesting  
53 considerably smaller effects and potential small study bias (Sala et al., 2019).

54 The aim of the current review is therefore twofold: (1) conduct pairwise meta-analysis to  
55 investigate the efficacy of combined cognitive and physical training interventions on cognitive,  
56 physical, psychosocial and functional outcomes in older adults across RCTs; and (2) apply  
57 network meta-analysis to compare and rank the efficacy of the three main types of combined  
58 intervention delivery formats (simultaneous, sequential and exergaming) on cognitive and  
59 physical function relative to either intervention alone or inert control conditions.

60

## 61 **2. Method**

### 62 **2.1 Protocol and registration**

63 This work adheres to the Preferred Reporting Items for Systematic reviews and Meta-  
64 Analyses (PRISMA) guidelines (Liberati et al., 2009) and PRISMA extension for network meta-  
65 analysis (Hutton et al., 2015) and was prospectively registered with PROSPERO  
66 (CRD42020143509).

### 67 **2.2 Search strategy and study selection**

68 We searched MEDLINE, Embase and PsycINFO from inception to 23 July 2019 to  
69 identify RCTs examining the effects of combined cognitive and physical training on cognitive,

70 physical, psychosocial or functional outcomes (see Appendix A for the full search strategy). No  
71 restrictions on language or publication type were applied. Two independent reviewers (CD and  
72 MM or AW) conducted initial screening of titles and abstracts and assessed full-text versions of  
73 potentially relevant articles. Disagreements were resolved by a third reviewer (AL or HMG). The  
74 electronic search was complemented by hand-searching the references of included papers and  
75 previous reviews.

## 76 **2.3 Eligibility criteria**

### 77 **2.3.1 Types of studies**

78 Published, peer-reviewed reports of RCTs investigating the effects of a combined  
79 cognitive and physical exercise intervention on one or more cognitive, physical, psychosocial or  
80 functional outcome in older adults were included. No restrictions on the type or size of  
81 randomized trials were applied in order to ensure that all relevant literature was included. The  
82 primary outcome was cognitive function; therefore, eligible studies needed to provide at least  
83 one untrained cognitive outcome. Studies were included if they compared a combined  
84 intervention with cognitive or physical training alone, a control intervention or a passive control  
85 group. Randomized crossover trials were included, but only the first treatment phase was  
86 considered for analysis to avoid the influence of potential carryover effects.

### 87 **2.3.2 Types of participants**

88 Studies were included if they focused on older adults and had a mean age of 60 years or  
89 older. This included cognitively healthy older adults, people with subjective cognitive  
90 complaints, mild cognitive impairment (MCI), dementia or Parkinson's disease, all are  
91 populations for which the efficacy of cognitive training or physical exercise have been evaluated

92 in previous systematic reviews. Eligibility was confirmed by examining the study inclusion  
93 criteria and baseline characteristics of the sample.

### 94 **2.3.3 Types of interventions**

95 Studies were included if they focused on interventions combining process-based  
96 cognitive training with structured physical exercise. Process-based cognitive training was  
97 defined as repeated practice on tasks targeting one or several cognitive domains, as opposed to  
98 explicit learning of strategies (Lustig et al., 2009). Physical exercise included any form of  
99 structured physical activity, such as aerobic exercise, strength or functional (i.e., gait or balance)  
100 training. Combined interventions could be delivered as (1) *simultaneous training*: cognitive  
101 training and physical exercise delivered concurrently in a dual-task format; (2) *sequential*  
102 *training*: cognitive training and physical exercise delivered in separate sessions, either on the  
103 same day or on different days; or (3) *exergaming*: physically active video games including  
104 cognitively challenging tasks. Exergaming interventions were included if the games placed  
105 cognitive demands, such as requiring attention, processing speed, planning or decision making,  
106 at a level commensurate with process-based cognitive training; pure exercise or sport games,  
107 such as yoga or balance exercises were excluded. To allow the inclusion of multicomponent  
108 strategies, interventions including other components such as psychoeducation, strategy-based  
109 cognitive training or diet were eligible as long as cognitive training and physical exercise were  
110 each provided for at least 20% of the total intervention time. Studies with interventions that  
111 comprised more than 20% of one intervention but less than 20% of the other (e.g., Ngandu et al.,  
112 2015) were excluded.

113

114

#### 115 **2.3.4 Types of controls**

116 Studies were included if they compared a combined intervention with physical exercise,  
117 cognitive training, a sham intervention (e.g. health education, relaxation, stretching or non-  
118 specific cognitive activities such as data entry on a computer) or a passive control group (wait-  
119 list, no-contact). In multi-arm studies, all eligible control conditions were included.

#### 120 **2.3.5 Types of outcomes**

121 Outcomes included were change from baseline to post-intervention on measures of  
122 untrained cognitive outcomes (global or domain-specific), performance-based physical exercise  
123 outcomes (aerobic capacity, strength, mobility, balance or gait), psychosocial outcomes  
124 (neuropsychiatric symptoms, depression, quality of life) and functional outcomes (activities of  
125 daily living (ADL) or instrumental ADL).

#### 126 **2.4 Data collection and coding**

127 Data were extracted by one reviewer (HMG or CD) and checked against the original  
128 publication by another reviewer (SA). For each study, we extracted population, intervention and  
129 control characteristics and results for each eligible outcome. Outcomes were recorded as mean  
130 and standard deviation for each condition and time-point (pre and post intervention). When  
131 means and standard deviations were not available, data were entered as mean change and  
132 standard deviation or mean differences and 95% confidence interval (CI). If data could not be  
133 extracted from the study report, we contacted the authors and asked for missing group-level data.  
134 For data extraction purposes, cognitive outcomes were classified by a neuropsychologist (HMG)  
135 according to the Cattell-Horn-Carroll-Miyake taxonomy of cognitive domains described by  
136 Webb et al. (2018): (1) executive function; (2) short-term and working memory; (3) long-term  
137 storage and retrieval; (4) processing speed; (5) visual processing; and (6) fluid reasoning.



138 Although this framework allows for further classification of cognitive outcomes into more  
139 specific narrow abilities (e.g., *short-term and working memory* can be further subdivided into  
140 *high working memory, low working memory and short-term memory*), we used the broad abilities  
141 to ensure a sufficient number of studies within each category to allow for meaningful  
142 interpretation. Cognitive screening instruments, such as the Mini-Mental State Examination,  
143 were classified as global cognition (Hill et al., 2017; Lampit et al., 2014). Physical outcomes  
144 were classified according to the following domains: (1) aerobic capacity; (2) strength; (3)  
145 functional mobility; (4) gait; (5) balance; and (6) cognitive-motor outcomes (concurrent physical  
146 and cognitive tasks), these classifications were made under the supervision of an exercise  
147 physiologist (AS). For cognitive-motor outcomes, only the physical performance outcome (i.e.,  
148 not cognitive task performance) was included. The classifications of outcomes by domain are  
149 provided in Appendix B. Following the approach of previous meta-analyses (Gheysen et al.,  
150 2018; Stanmore et al., 2017; Zhu et al., 2016), each combined intervention arm was classified  
151 according to their mode of delivery as either simultaneous, sequential or exergaming training.  
152 Comparison groups were classified as: cognitive training (cognitive training alone or in  
153 combination with sham physical exercise, e.g., stretching), physical exercise (physical exercise  
154 alone or in combination with sham cognitive training or other non-specific cognitive activities),  
155 sham interventions (active control groups, e.g., sham physical exercise and/or sham cognitive  
156 training, health education, non-specific cognitive activities) or passive control (wait-list, no-  
157 contact). Study participants were classified as either cognitively healthy, MCI, dementia or  
158 Parkinson's disease by examining the study inclusion criteria and the baseline characteristics of  
159 the sample. Studies including participants with subjective cognitive complaints but no objective  
160 cognitive impairment were classified as cognitively healthy. Classification of clinical

161 populations were based on the definitions provided by the study authors; for MCI this could  
162 include diagnosis based on clinical assessment and/or cognitive cut-off scores. If a study  
163 included a cognitively or physically frail population without further specification of diagnosis  
164 (e.g., people in long-term nursing homes), we classified the population based on the cognitive  
165 and functional status at baseline (Hill et al., 2017).

## 166 **2.5 Risk of bias within studies**

167 Two independent reviewers (CD and RM) assessed the risk of bias in individual studies  
168 using the revised Cochrane risk-of-bias tool for randomized trials (ROB 2) (Sterne et al., 2019).  
169 Disagreements were resolved by consulting a third reviewer (HMG or AL). Studies with high  
170 risk of bias or some concerns in the domains bias due to missing outcome data or bias in  
171 measurement of the outcome were considered as having a high risk of bias or some concerns,  
172 respectively (Hill et al., 2017; Lampit et al., 2014).

173

## 174 **2.6 Data analysis**

175 Analyses were conducted using the R packages robumeta (Fisher et al., 2017),  
176 clubSandwich (Pustejovsky, 2020) and netmeta (Rücker et al., 2020a). Between-group  
177 differences in change from baseline to post-intervention were converted to standardized mean  
178 differences and calculated as Hedges'  $g$  with 95% CI. Pooling of effect estimates across studies  
179 were conducted using random-effects models. Studies including participants with dementia and  
180 Parkinson's disease were excluded from the pooled analyses due to an insufficient number of  
181 identified studies available for analysis ( $k=2$  for dementia and Parkinson's disease, respectively;  
182 see 3.2 *Characteristics of included studies*). Instead, these studies were summarized narratively.

183           The analysis was conducted in two steps: First, pairwise meta-analysis was conducted  
184 using robust variance estimation implemented in robumeta, accounting for the dependency  
185 structure of effect estimates within studies (Hedges et al., 2010). Analyses were performed for  
186 overall cognitive (Gheysen et al., 2018; Hill et al., 2017; Lampit et al., 2014; Stanmore et al.,  
187 2017; Zhu et al., 2016), physical (Falck et al., 2019), psychosocial and functional outcomes (Hill  
188 et al., 2017) as well as for each cognitive and physical subdomain separately. Heterogeneity  
189 across studies was quantified using  $\tau^2$  and expressed as a proportion of overall observed variance  
190 using the  $I^2$  statistic (Borenstein et al., 2017). Prediction intervals were calculated to assess the  
191 dispersion of true effects (Riley et al., 2011). Subgroup analyses based on pre-specified  
192 categorical moderators (population group, intervention duration, supervision, risk of bias) were  
193 conducted using mixed-effects meta-regression models. Small-study effect was investigated by  
194 visually inspecting funnel plots of effect size vs standard error and formally tested using the  
195 Egger's test (Egger et al., 1997; Sterne et al., 2011).

196           Second, random-effects network meta-analysis was performed using a frequentist  
197 framework, implemented in the netmeta package for R. To examine the transitivity assumptions,  
198 we created a table summarizing potential effect modifiers (population and design characteristics)  
199 to explore whether these were similarly distributed across the different comparisons. The  
200 geometry of the network was summarized in a network graph and league tables were created to  
201 display the relative effect sizes of all available comparisons. Ranking of treatments were  
202 estimated using P-scores, representing the extent of certainty that an intervention is more  
203 effective than another intervention, averaged over all treatment arms (Rucker and Schwarzer,  
204 2015). Sensitivity analyses were conducted excluding trials with a high risk of bias, and by  
205 conducting separate analyses for studies classified as cognitively healthy older adults and MCI.

206 The certainty of the evidence was investigated using the Confidence in Network Meta-Analysis  
207 tool (Nikolakopoulou et al., 2020; Papakonstantinou et al., 2020), incorporating six domains:  
208 within-study bias, reporting bias, indirectness, imprecision, heterogeneity and incoherence.

209

### 210 **3. Results**

#### 211 **3.1 Study selection**

212 After exclusion of duplicate search results, we screened 23,102 articles for eligibility, of  
213 which 22,690 were excluded based on titles and abstracts. Consequently, 412 articles were  
214 assessed in full-text screening. Of these, 45 unique studies fulfilled inclusion criteria. A list of  
215 the excluded studies (with reasons) is provided in Appendix C. Two additional eligible studies  
216 were identified through manual search (Adcock et al., 2020; Rezola-Pardo et al., 2019). Thus, a  
217 total of 47 studies fulfilled inclusion criteria (Fig. 1). Additionally, eight secondary outcome  
218 articles were identified (Boa Sorte Silva et al., 2018a; Boa Sorte Silva et al., 2017; Eggenberger  
219 et al., 2015b; Fraser et al., 2017; Hagovska and Nagyova, 2017; Hagovska and Olekszyova,  
220 2016; Mavros et al., 2017; Middleton et al., 2018) and included along with other manuscripts  
221 from the same study. The authors of seven studies (Barban et al., 2017; Boa Sorte Silva et al.,  
222 2018b; Htut et al., 2018; Mavros et al., 2017; McDaniel et al., 2014; Middleton et al., 2018; Ten  
223 Brinke et al., 2019) were contacted for data and four (Htut et al., 2018; Mavros et al., 2017;  
224 Middleton et al., 2018; Ten Brinke et al., 2019) provided data.

225

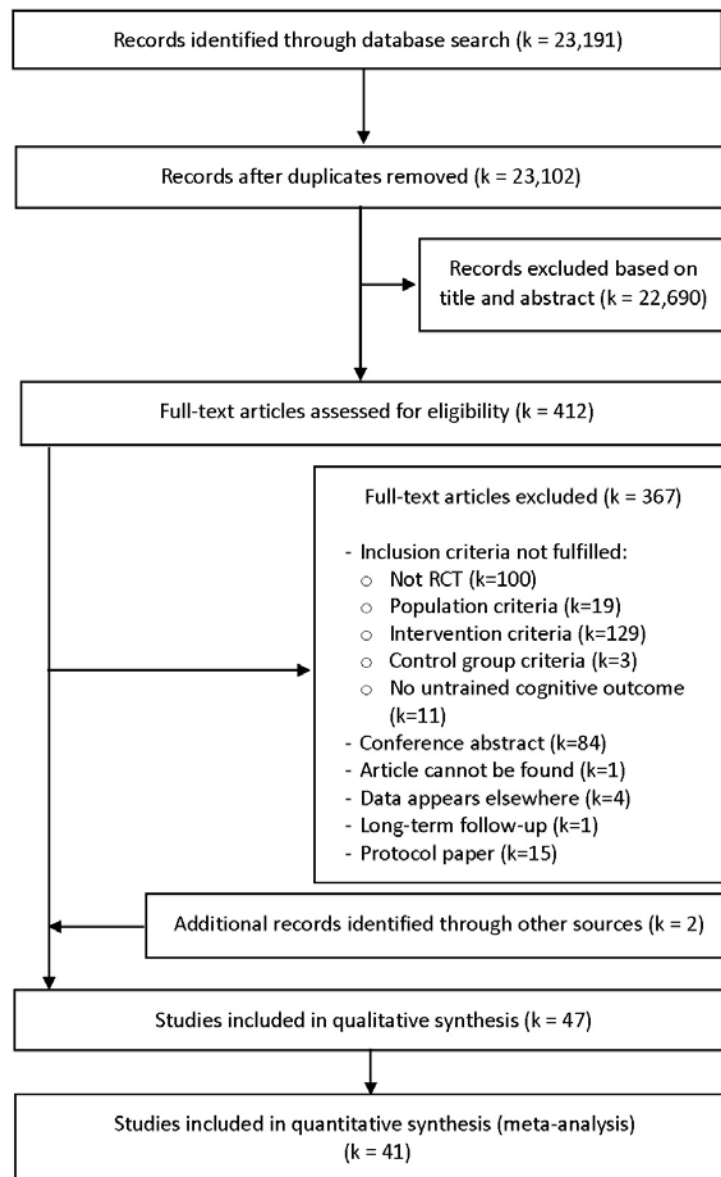

226

227 **Fig. 1.** PRISMA flow chart

228

### 229 3.2 Characteristics of included studies

230 The characteristics of the included studies are presented in Table 1. The included studies

231 encompassed 4,052 participants with mean age ranging between 65.0 and 87.2 years. The

232 majority of the studies included cognitively healthy older adults ( $k=30$ ,  $n=2,866$ ), two of which

233 (Barnes et al., 2013; Boa Sorte Silva et al., 2018b) included participants with subjective  
234 cognitive complaints. Twelve studies included participants with MCI and one additional study  
235 (Stanmore et al., 2019) included people living in assisted living facilities without severe  
236 cognitive impairment. This study was classified as MCI for the purpose of the subgroup  
237 analyses, giving a total of 13 studies ( $n=932$ ) in this category. Two studies included participants  
238 with Parkinson's disease without dementia (Pompeu et al., 2012; Song et al., 2018). One study  
239 included people with dementia (Karssemeijer et al., 2019) and one included long-term nursing  
240 home residents (Rezola-Pardo et al., 2019), which was classified as dementia and thus excluded  
241 from the pooled analyses. Intervention duration ranged from four to 40 weeks (median = 12  
242 weeks). Sixteen studies combined cognitive and physical training using a sequential design, in  
243 which eight provided physical and cognitive training in separate sessions (Barnes et al., 2013;  
244 Desjardins-Crepeau et al., 2016; Fabre et al., 2002; Maffei et al., 2017; McDaniel et al., 2014;  
245 Romera-Liebana et al., 2018; Shatil, 2013; van het Reve and de Bruin, 2014), and eight  
246 implemented the cognitive and physical training back-to-back within the same session (Barban et  
247 al., 2017; Damirchi et al., 2018; Fiatarone Singh et al., 2014; Hagovska et al., 2016; Legault et  
248 al., 2011; Linde and Alfermann, 2014; Rahe et al., 2015; Ten Brinke et al., 2019). Examples of  
249 sequential training include separate sessions of aerobic and resistance training, and computerized  
250 cognitive training (see Table 1 for details). Thirteen studies used a simultaneous design (Boa  
251 Sorte Silva et al., 2018b; Combourieu Donnezan et al., 2018; Hiyamizu et al., 2012; Kitazawa et  
252 al., 2015; Laatar et al., 2018; Leon et al., 2015; Mrakic-Sposta et al., 2018; Nishiguchi et al.,  
253 2015; Norouzi et al., 2019; Park et al., 2019; Reigal and Mendo, 2014; Rezola-Pardo et al., 2019;  
254 Shimada et al., 2018), such as learning complex stepping patterns, solving cognitive tasks while  
255 simultaneously performing strength and balance exercises, or conducting computerized cognitive

256 training during aerobic exercise on bikes. Seventeen studies included exergaming interventions  
257 (Adcock et al., 2020; Anderson-Hanley et al., 2018; Bacha et al., 2018; Barcelos et al., 2015;  
258 Delbroek et al., 2017; Eggenberger et al., 2016; Gschwind et al., 2015; Htut et al., 2018; Hughes  
259 et al., 2014; Karssemeijer et al., 2019; Maillot et al., 2012; Pompeu et al., 2012; Schattin et al.,  
260 2016; Schoene et al., 2013; Schoene et al., 2015; Song et al., 2018; Stanmore et al., 2019),  
261 examples include videogame dancing, cybercycling exergames, and commercial videogames  
262 with cognitively challenging components. One study (Eggenberger et al., 2015a) included an  
263 exergaming as well as a simultaneous intervention, while another (Rahe et al., 2015) included  
264 two sequential training intervention arms, one of which also included motivational counselling.  
265 The latter study was split into two separate studies for the network meta-analysis to allow for  
266 inclusion of both sequential training arms in the analysis. Comparison conditions included  
267 physical exercise ( $k=29$ ), cognitive training ( $k=13$ ), sham interventions ( $k=14$ ) and passive  
268 control ( $k=19$ ). Ten studies (21%) had a high risk of bias, 17 (36%) had some concerns, and 20  
269 (43%) had a low risk of bias (Appendix D).

270

### 271 **3.4 Pairwise meta-analysis**

#### 272 **3.4.1 Cognitive function**

273 Across 43 studies and 491 effect estimates, the overall effect of combined interventions  
274 on cognitive function was moderate and statistically significant, Hedges'  $g = 0.34$  (95% CI 0.14  
275 to 0.55), with high heterogeneity ( $\tau^2 = 0.29$ ,  $I^2 = 82\%$ ). The funnel plot revealed two conspicuous  
276 outliers, both reporting implausibly large  $g$  values of 1.74 (Laatar et al., 2018) and 4.52-5.54  
277 (Leon et al., 2015) under high risk of bias. The studies were therefore removed from all further  
278 analysis. After removal of these outliers, heterogeneity was reduced, and the funnel plot showed  
279 no significant asymmetry ( $\beta = 0.51$ ,  $p = 0.24$ , Appendix E). Across the remaining 41 studies and

280 482 effect estimates, the overall effect on cognitive outcomes was small and statistically  
281 significant,  $g = 0.22$  (95% CI 0.14 to 0.30,  $\tau^2 = 0.08$ ,  $I^2 = 56\%$ , prediction interval -0.34 to 0.78).

282 The results of individual studies and comparisons are provided in Appendix F. There was no  
283 statistically significant difference in effect estimates between studies classified as low, some  
284 concerns or high risk of bias (Table 2).

285         The results of the moderator analyses for cognitive outcomes are shown in Table 2. A  
286 statistically significant effect for was found for cognitively healthy older adults and for  
287 participants with MCI, with no significant difference between the groups. There was no  
288 significant difference in the efficacy of interventions that were 12 weeks or shorter compared to  
289 interventions with a duration of  $> 12$  weeks. Similarly, no evidence for statistically significant  
290 subgroup difference was found for supervised training compared to unsupervised training,  
291 however, because of the small number of studies with unsupervised training (i.e.,  $df < 4$ ), these  
292 results should be interpreted with caution. For the different cognitive domains, statistically  
293 significant effect estimates were found for executive function, short-term and working memory,  
294 long-term storage and retrieval, processing speed, fluid reasoning and global cognition, but not  
295 for visual processing (Table 3).



296 **Table 2.** Moderator analyses of overall cognitive and physical outcomes.

| Moderator                 | No. of studies<br>(effect sizes) | Summary effect               |          |       |          | Test of moderation |      |          |
|---------------------------|----------------------------------|------------------------------|----------|-------|----------|--------------------|------|----------|
|                           |                                  | Hedges' <i>g</i><br>(95% CI) | <i>t</i> | df    | <i>p</i> | <i>F</i>           | df   | <i>p</i> |
| <b>Cognitive outcomes</b> |                                  |                              |          |       |          |                    |      |          |
| Population                |                                  |                              |          |       |          | 0.32               | 18.1 | 0.58     |
| Healthy                   | 28 (363)                         | 0.20 (0.12 to 0.29)          | 4.94     | 24.93 | <0.001   |                    |      |          |
| MCI                       | 13 (119)                         | 0.26 (0.06 to 0.46)          | 2.94     | 9.81  | 0.02     |                    |      |          |
| Duration                  |                                  |                              |          |       |          | 0.55               | 29.9 | 0.47     |
| 12 weeks or less          | 25 (247)                         | 0.24 (0.13 to 0.36)          | 4.45     | 21.1  | <0.001   |                    |      |          |
| >12 weeks                 | 16 (235)                         | 0.19 (0.08 to 0.30)          | 3.62     | 13.6  | 0.003    |                    |      |          |
| Supervision               |                                  |                              |          |       |          | 0.96               | 3.40 | 0.39     |
| Supervised                | 37 (445)                         | 0.23 (0.15 to 0.31)          | 5.54     | 31.86 | <0.001   |                    |      |          |
| Unsupervised              | 4 (37)                           | 0.14 (-0.14 to 0.42)         | 1.66     | 2.72  | 0.20     |                    |      |          |
| Risk of Bias              |                                  |                              |          |       |          | 0.14               | 17.6 | 0.87     |
| Low                       | 16 (223)                         | 0.21 (0.12 to 0.30)          | 5.11     | 13.85 | <0.001   |                    |      |          |
| Some concerns             | 17 (158)                         | 0.24 (0.05 to 0.44)          | 2.71     | 14.98 | 0.02     |                    |      |          |
| High                      | 8 (101)                          | 0.19 (0.04 to 0.33)          | 3.08     | 6.06  | 0.02     |                    |      |          |
| <b>Physical outcomes</b>  |                                  |                              |          |       |          |                    |      |          |
| Population                |                                  |                              |          |       |          | 0.66               | 10.2 | 0.44     |
| Healthy                   | 24 (240)                         | 0.23 (0.08 to 0.38)          | 3.10     | 21.86 | 0.005    |                    |      |          |
| MCI                       | 8 (67)                           | 0.32 (0.12 to 0.52)          | 3.84     | 6.36  | 0.008    |                    |      |          |
| Duration                  |                                  |                              |          |       |          | 4.52               | 18.2 | 0.048    |
| 12 weeks or less          | 21 (187)                         | 0.33 (0.17 to 0.48)          | 4.44     | 18.65 | <0.001   |                    |      |          |
| >12 weeks                 | 11 (120)                         | 0.09 (-0.10 to 0.28)         | 1.07     | 9.01  | 0.31     |                    |      |          |
| Supervision               |                                  |                              |          |       |          | 0.65               | 3.78 | 0.47     |
| Supervised                | 28 (255)                         | 0.27 (0.13 to 0.40)          | 3.93     | 25.32 | <0.001   |                    |      |          |
| Unsupervised              | 4 (52)                           | 0.15 (-0.26 to 0.56)         | 1.20     | 2.82  | 0.32     |                    |      |          |
| Risk of Bias              |                                  |                              |          |       |          | 0.08               | 7.71 | 0.93     |
| Low                       | 12 (108)                         | 0.28 (0.00 to 0.55)          | 2.23     | 10.43 | 0.05     |                    |      |          |
| Some concerns             | 16 (151)                         | 0.24 (0.09 to 0.39)          | 3.42     | 14.52 | 0.004    |                    |      |          |
| High                      | 4 (48)                           | 0.20 (-0.19 to 0.60)         | 1.79     | 2.67  | 0.18     |                    |      |          |

297

298

299

### 300 **3.4.2 Physical function**

301           Thirty-two studies reporting 307 effect estimates were available for physical outcomes.  
302   The overall effect was small and statistically significant,  $g = 0.25$  (95% CI 0.13 to 0.37), with  
303   moderate heterogeneity ( $\tau^2 = 0.12$ ,  $I^2 = 63\%$ , 95% prediction interval -0.46 to 0.96). The results  
304   of individual studies and comparisons are provided in Appendix G. There was no indication of  
305   funnel plot asymmetry ( $\beta = 0.47$ ,  $p = 0.52$ , Appendix E). No statistically significant difference  
306   was found in effect estimates between studies classified as low, some concerns or high risk of  
307   bias (Table 2).

308           There was no statistically significant difference in the efficacy of combined interventions  
309   on physical outcomes for cognitively healthy older adults compared to those with MCI. A  
310   significant moderating effect was found for intervention duration, whereby a beneficial effect  
311   was seen for interventions that were 12 weeks or shorter but not for interventions with > 12  
312   weeks duration. No significant moderating effect on physical outcomes was seen for training  
313   supervision; however, due to the small number of studies with unsupervised training, these  
314   results should be interpreted with caution. Table 2 shows the full results from the moderator  
315   analyses of physical outcomes. For the physical subdomains, a statistically significant effect was  
316   found for functional mobility, but not for strength, aerobic capacity, balance, gait, or cognitive-  
317   motor outcomes (Table 3).

318

319

320

321

322

323 **Table 3.** Meta-analyses of cognitive and physical domains.

| Domain                          | No. of studies<br>(effect sizes) | Hedges' <i>g</i> (95% CI) | <i>I</i> <sup>2</sup> | $\tau^2$ |
|---------------------------------|----------------------------------|---------------------------|-----------------------|----------|
| <b>Cognitive outcomes</b>       |                                  |                           |                       |          |
| Executive function              | 27 (113)                         | 0.22 (0.13 to 0.30)       | 31%                   | 0.03     |
| Short-term and working memory   | 21 (75)                          | 0.30 (0.05 to 0.55)       | 72%                   | 0.18     |
| Long-term storage and retrieval | 18 (119)                         | 0.17 (0.04 to 0.30)       | 47%                   | 0.04     |
| Processing speed                | 22 (109)                         | 0.17 (0.07 to 0.27)       | 30%                   | 0.03     |
| Visual processing               | 6 (14)                           | 0.11 (-0.18 to 0.40)      | 59%                   | 0.12     |
| Fluid reasoning                 | 7 (25)                           | 0.24 (0.02 to 0.46)       | 36%                   | 0.03     |
| Global cognition                | 15 (22)                          | 0.30 (0.06 to 0.53)       | 70%                   | 0.15     |
| <b>Physical outcomes</b>        |                                  |                           |                       |          |
| Functional mobility             | 22 (83)                          | 0.34 (0.16 to 0.52)       | 70%                   | 0.15     |
| Strength                        | 9 (33)                           | 0.17 (-0.10 to 0.44)      | 55%                   | 0.07     |
| Aerobic capacity                | 14 (39)                          | 0.10 (-0.06 to 0.26)      | 13%                   | 0.01     |
| Balance                         | 12 (24)                          | 0.23 (-0.04 to 0.49)      | 62%                   | 0.09     |
| Gait                            | 10 (41)                          | 0.06 (-0.23 to 0.34)      | 60%                   | 0.12     |
| Cognitive-motor                 | 14 (87)                          | 0.19 (-0.01 to 0.39)      | 64%                   | 0.12     |

324

325

326 **3.4.3 Psychosocial function**

327         Nine studies reporting 20 psychosocial effect estimates were available, six in cognitively  
328 healthy older adults and three in MCI. The results of individual studies and comparisons are  
329 provided in Appendix H. The overall effect was small and statistically non-significant,  $g = 0.28$   
330 (95% CI -0.16 to 0.72) with high heterogeneity ( $\tau^2 = 0.24$ ,  $I^2 = 81\%$ , prediction interval -0.97 to  
331 1.53). Visual inspection of the funnel plot revealed one outlier (Hagovska et al., 2016) (see  
332 Appendix E), reporting an effect estimate of  $g = 1.80$ . A sensitivity analysis after removal of the  
333 outlier revealed a negligible but statistically significant effect,  $g = 0.10$  (95% CI 0.01 to 0.20)  
334 with no heterogeneity ( $\tau^2 = 0.00$ ,  $I^2 = 0\%$ ).

335

#### 336 **3.4.4 Functional abilities**

337 Only two trials were identified that reported functional outcomes (Fiatarone Singh et al.,  
338 2014; Hagovska et al., 2016) and data were therefore not pooled in meta-analysis. Both studies  
339 included participants with MCI. Improvements following combined interventions were reported  
340 for ADL (Hagovska and Nagyova, 2017) but not for instrumental ADL (Fiatarone Singh et al.,  
341 2014; Hagovska et al., 2016). One additional study (Gschwind et al., 2015) reported no  
342 significant benefit in general health and disability in healthy older adults.

343

#### 344 **3.4.5 Studies in dementia or Parkinson's disease**

345 The results for dementia ( $k=2$ ) and Parkinson's disease ( $k=2$ ) are provided in Appendix I,  
346 showing no significant benefits on overall cognitive, physical or psychosocial function in the  
347 individual studies and comparisons. For dementia, Karssemeijer et al. (2019) reported  
348 improvements in psychomotor speed following an exergaming intervention compared to active  
349 control, but not compared to physical exercise alone. No differences between the groups were  
350 found in working memory, executive function or episodic memory. Rezola-Pardo et al. (2019)  
351 reported no additional benefits of simultaneous training compared to physical exercise alone on a  
352 range of cognitive, physical and psychosocial outcomes in people living in long-term nursing  
353 homes. In Parkinson's disease, two studies reported no cognitive or physical benefits of  
354 exergaming compared to physical exercise (Pompeu et al., 2012) or passive control (Song et al.,  
355 2018).

356

#### 357 **3.5 Network meta-analysis**

358 One study (Htut et al., 2018) was excluded from the network meta-analysis due to  
359 inconsistent treatment estimates and variances. Visual inspection of potential effect modifiers

360 showed that these were similarly distributed across the network of included comparisons  
361 (Appendix J), suggesting that the transitivity assumption was plausible. Four studies used  
362 unsupervised training, all of which compared exergaming with passive control (Adcock et al.,  
363 2020; Gschwind et al., 2015; Schoene et al., 2013; Schoene et al., 2015). These studies were  
364 therefore downgraded to moderate indirectness in the grading of the certainty of the evidence.  
365 Figure 2 visualizes the well-connected network structure for both cognitive (Fig. 2a) and  
366 physical (Fig. 2b) outcomes, indicating a high amount of direct evidence for the various  
367 treatment comparisons. The most frequently examined comparisons were between sequential  
368 training, physical exercise, cognitive training and sham intervention, as well as between  
369 exergaming and passive control.

370

371

372

373

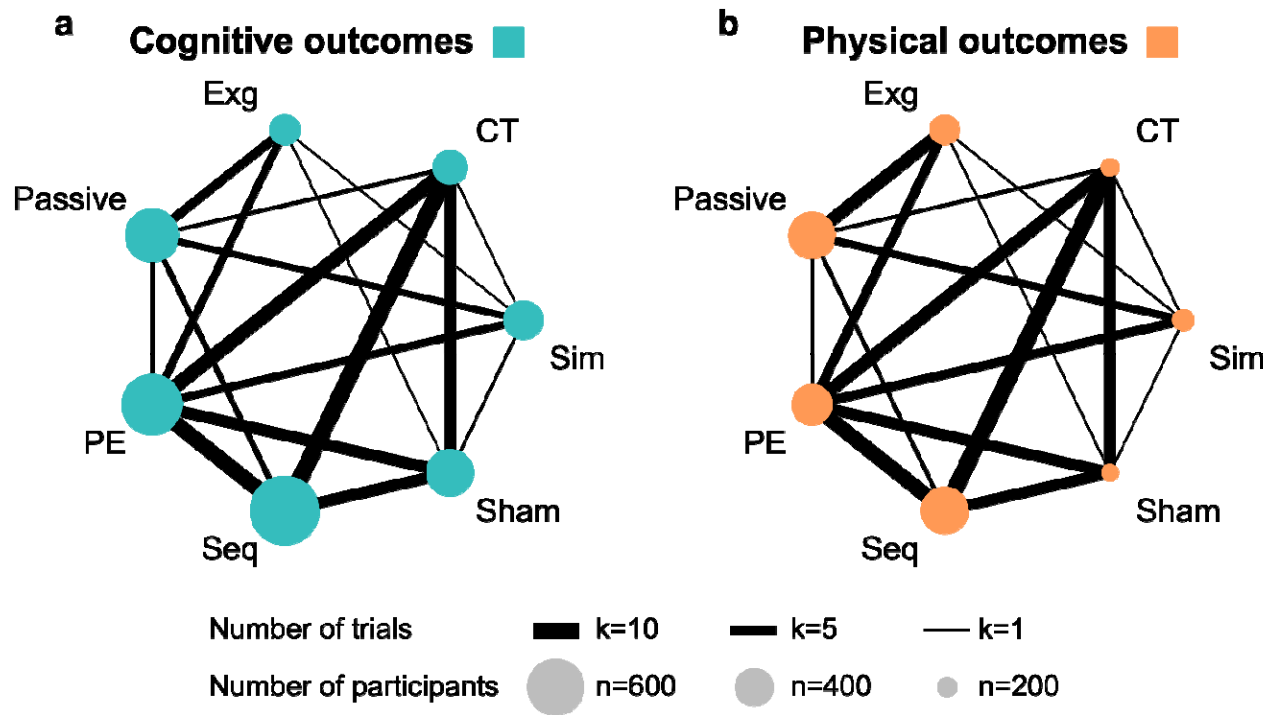

374

375 **Fig. 2.** Network plot for (a) cognitive outcomes and (b) physical outcomes. The width of the  
376 lines represents the number of studies comparing each pair of treatments. The size of the circle  
377 represents the sample size in each arm. CT = cognitive training. Exg = exergaming. Passive =  
378 passive control. PE = physical exercise. Seq = sequential training. Sham = sham intervention.  
379 Sim = simultaneous training.

380

### 381 3.5.1 Cognitive function

382 Network meta-analysis for cognitive outcomes included 41 studies, 28 in cognitively  
383 healthy older adults and 13 in MCI. The results are shown in Table 4. Indirect evidence was  
384 obtained for four comparisons for which direct evidence was unavailable (exergaming vs  
385 cognitive training, exergaming vs sequential training, sham intervention vs passive control, and  
386 sequential vs simultaneous training, Fig 2a). All conditions except sham interventions were  
387 significantly more efficacious for cognitive function than passive control ( $g$  range 0.18 to 0.43).

388 Simultaneous and sequential training were significantly more efficacious for cognitive function  
 389 than physical exercise ( $g = 0.24$  and  $0.15$ , respectively) and sham intervention ( $g = 0.31$  and  
 390  $0.22$ , respectively). A statistically significant benefit was also found for simultaneous training  
 391 relative to exergaming ( $g = 0.25$ ). No significant differences were found between the three types  
 392 of combined interventions compared to cognitive training alone ( $g$  range  $-0.14$  to  $0.11$ ). The  
 393 certainty of the evidence is shown in Appendix K. Confidence ratings were moderate or high for  
 394 the majority of the comparisons, with the exception of low certainty of the evidence due to  
 395 within study bias and imprecision for the comparisons of exergaming vs sequential training,  
 396 cognitive training and sham interventions; and simultaneous training vs sequential training and  
 397 cognitive training.

398

399 **Table 4.** Relative effect estimates for the contrasts between the different intervention and control  
 400 arms on cognitive function (below diagonal) and physical function (above diagonal). Statistically  
 401 significant effects are shown in bold.

|                                      |                                      |                                      |                                      |                                         |                                      |                                      |
|--------------------------------------|--------------------------------------|--------------------------------------|--------------------------------------|-----------------------------------------|--------------------------------------|--------------------------------------|
| <b>Simultaneous</b>                  | 0.01<br>[-0.22; 0.24]                | 0.23<br>[-0.01; 0.47]                | <b>0.33</b><br>[ <b>0.07; 0.59</b> ] | 0.12<br>[-0.08; 0.32]                   | <b>0.35</b><br>[ <b>0.08; 0.62</b> ] | <b>0.44</b><br>[ <b>0.23; 0.66</b> ] |
| 0.09<br>[-0.06; 0.25]                | <b>Sequential</b>                    | 0.22<br>[-0.004; 0.44]               | <b>0.32</b><br>[ <b>0.13; 0.51</b> ] | 0.11<br>[-0.05; 0.27]                   | <b>0.34</b><br>[ <b>0.13; 0.55</b> ] | <b>0.43</b><br>[ <b>0.24; 0.63</b> ] |
| <b>0.25</b><br>[ <b>0.06; 0.45</b> ] | 0.16<br>[-0.02; 0.33]                | <b>Exergaming</b>                    | 0.10<br>[-0.16; 0.36]                | -0.11<br>[-0.32; 0.09]                  | 0.12<br>[-0.15; 0.39]                | <b>0.21</b><br>[ <b>0.04; 0.38</b> ] |
| 0.11<br>[-0.06; 0.28]                | 0.02<br>[-0.11; 0.14]                | -0.14<br>[-0.34; 0.06]               | <b>Cognitive training</b>            | <b>-0.21</b><br>[ <b>-0.41; -0.01</b> ] | 0.02<br>[-0.20; 0.24]                | 0.11<br>[-0.13; 0.36]                |
| <b>0.24</b><br>[ <b>0.10; 0.38</b> ] | <b>0.15</b><br>[ <b>0.03; 0.26</b> ] | -0.01<br>[-0.18; 0.16]               | 0.13<br>[-0.003; 0.26]               | <b>Physical exercise</b>                | <b>0.23</b><br>[ <b>0.02; 0.44</b> ] | <b>0.32</b><br>[ <b>0.13; 0.52</b> ] |
| <b>0.31</b><br>[ <b>0.17; 0.46</b> ] | <b>0.22</b><br>[ <b>0.09; 0.35</b> ] | 0.06<br>[-0.13; 0.25]                | <b>0.20</b><br>[ <b>0.07; 0.34</b> ] | 0.07<br>[-0.05; 0.20]                   | <b>Sham</b>                          | 0.09<br>[-0.16; 0.35]                |
| <b>0.43</b><br>[ <b>0.27; 0.60</b> ] | <b>0.34</b><br>[ <b>0.21; 0.47</b> ] | <b>0.18</b><br>[ <b>0.03; 0.33</b> ] | <b>0.32</b><br>[ <b>0.16; 0.49</b> ] | <b>0.19</b><br>[ <b>0.05; 0.34</b> ]    | 0.12<br>[-0.04; 0.28]                | <b>Passive</b>                       |

402

403

404

### 405 **3.5.2 Physical function**

406           The network meta-analysis for physical outcomes included 32 studies, 24 in cognitively  
407 healthy older adults and eight in MCI. Indirect evidence was calculated for the same four  
408 comparisons as above for which direct evidence was unavailable. Simultaneous training,  
409 sequential training, exergaming and physical exercise were all significantly more efficacious for  
410 physical function than passive control ( $g$  range 0.21 to 0.44, Table 2). Simultaneous training,  
411 sequential training and physical exercise were significantly more efficacious for physical  
412 function than cognitive training ( $g$  range 0.21 to 0.33) and sham intervention ( $g$  range 0.23 to  
413 0.35). Certainty of the evidence was low or very low for the majority of the comparisons, mainly  
414 due to within-study bias, imprecision and heterogeneity, with the exception of high certainty for  
415 the comparison between sequential training and passive control and moderate certainty for the  
416 comparison between simultaneous training and passive control; and physical exercise and  
417 passive control (Appendix K).

418

### 419 **3.5.3 Ranking of interventions**

420           Figure 3 shows the relative rankings of the interventions with passive control as the  
421 reference treatment. For cognitive function, simultaneous training ranked best (P-score 0.96,  
422 Hedges'  $g$  0.43) followed by sequential training (P-score 0.78, Hedges'  $g$  0.34) and cognitive  
423 training (P-score 0.73, Hedges'  $g$  0.32). For physical function, simultaneous training ranked best  
424 (P-score 0.90, Hedges'  $g$  0.44), followed by sequential training (P-score 0.89, Hedges'  $g$  0.43)  
425 and physical exercise (P-score 0.67, Hedges'  $g$  0.32).

426



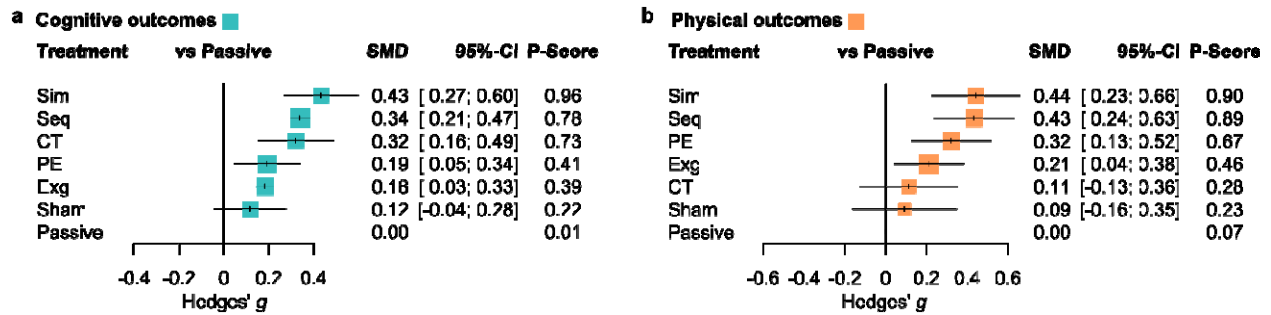

427

428 **Fig. 3.** Forest plot showing the relative ranking and effect estimate of interventions with passive

429 control as reference for overall (a) cognitive and (b) physical outcomes. CT = cognitive training.

430 Exg = exergaming. Passive = passive control. PE = physical exercise. Seq = sequential training.

431 Sham = sham intervention. Sim = simultaneous training.

432

### 433 3.5.4 Sensitivity analyses

434 The results from the sensitivity analyses are shown in Appendix L. The first sensitivity

435 analysis excluded studies with a high risk of bias. In the second sensitivity analysis, we

436 performed separate analyses for studies with cognitively healthy older adults and MCI. Overall,

437 results were highly convergent to the main analysis, although the small number of studies

438 including participants with MCI ( $k=13$  for cognitive outcomes and  $k=8$  for physical outcomes)

439 reduced the precision of effect estimates.

440

## 441 4. Discussion

442 Across 41 RCTs of narrowly defined combined cognitive training and physical exercise

443 interventions, we found that in cognitively healthy older adults and those with MCI,

444 simultaneous and sequential training lead to comparable cognitive benefits as cognitive training

445 alone, while their efficacy on physical function is similar to that of physical exercise. Thus,

446 although combined physical and cognitive interventions do not seem to induce additive cognitive

447 effects beyond that of cognitive training, their physical efficacy make these a compelling strategy  
448 for maintaining cognitive alongside physical health in late life. Given the average dose of  
449 simultaneous training was substantially lower than that of sequential designs (mean total training  
450 hours: 33 [range 8 to 72] and 60 [range 21 to 252], respectively) with comparable efficacy, the  
451 former might be considered as a more feasible option in clinical and community settings.  
452 Conversely, our results reveal small effect estimates and lower relative rankings for exergaming  
453 and thus do not support the efficacy of such interventions, at least at this stage.

454

#### 455 **4.1 Interpretation of results and comparison with previous research**

456 Our results provide a significant update to the current understanding of the effects of  
457 combined cognitive and physical training. We confirm the positive effects of combined  
458 interventions on cognition reported in previous meta-analyses (Gheysen et al., 2018; Stanmore et  
459 al., 2017; Zhu et al., 2016) and extend these findings by showing benefits also for overall  
460 physical function. Cognitive gains were found across most cognitive domains, whereas for  
461 physical function, a statistically significant effect was only observed for functional mobility,  
462 which was also the most frequently investigated outcome category. The overall cognitive and  
463 physical benefits were similar for cognitively healthy older adults and those with MCI and were  
464 not substantially influenced by bias within or across studies. Cognitive effect estimates did not  
465 depend on training duration; however, for physical outcomes, significant benefits were only  
466 observed for shorter ( $\leq 12$  weeks) interventions. No evidence for a moderating effect of training  
467 supervision was found, although this should be interpreted with caution given that the majority  
468 of the included studies involved supervised training. Moreover, moderate heterogeneity was  
469 observed in several of the domain-specific pairwise meta-analyses; therefore, a more detailed

470 investigation of potential effect modifiers, such as training content, dose, frequency and  
471 intensity, might be warranted to outline the intervention and design characteristics that could  
472 benefit specific cognitive and physical abilities.

473         Conversely, we did not find robust evidence that combined interventions improve  
474 psychosocial function, nor did we identify enough studies reporting on functional outcomes to  
475 synthesize the results in a pooled analysis. Although a statistically significant effect was  
476 observed for psychosocial function after outlier removal, the effect size was small and likely not  
477 of clinical relevance. Previous systematic reviews have reported mixed results for psychosocial  
478 and functional outcomes (Bruderer-Hofstetter et al., 2018; Karssemeijer et al., 2017; Zhu et al.,  
479 2016). The efficacy of combined interventions on everyday function and well-being therefore  
480 warrants further investigation and likely requires more consistent inclusion of these outcomes in  
481 primary trials in order to examine the extent to which these interventions can improve a wider  
482 range of clinically meaningful endpoints (Gavelin et al., 2020). Moreover, the number of  
483 identified studies for dementia and Parkinson’s disease was too small to allow for reliable  
484 pooling of the data. Based on the limited evidence available the observed benefits on cognitive,  
485 physical and psychosocial function for these populations appear to be more modest, however, the  
486 heterogeneous intervention and control conditions included across a small set of studies limits  
487 firm conclusions.

488         The results from the network meta-analysis showed that the cognitive effects of  
489 simultaneous and sequential training exceeded all control conditions apart from cognitive  
490 training alone, and that simultaneous training was likely to be the most beneficial approach.  
491 Systematic reviews indicate that both physical (Firth et al., 2018) and cognitive training (van  
492 Balkom et al., 2020) lead to positive neurobiological changes with potential therapeutic

493 relevance. The therapeutic premise of combined interventions is that physical and cognitive  
494 activities might influence brain plasticity through distinct and complementary pathways,  
495 whereby physical exercise induces physiological changes (e.g., upregulation of brain-derived  
496 neurotrophic factor, stimulation of hippocampal neurogenesis) which, in turn, facilitates the  
497 experience-dependent neuroplastic effects of cognitive engagement (Fissler et al., 2013;  
498 Kempermann et al., 2010). Due to the transient release of neurotrophic factors following physical  
499 exercise (Knaepen et al., 2010), it has been suggested that the physical and cognitive activity  
500 should be conducted in close temporal proximity to achieve maximal benefit (Fissler et al.,  
501 2013), with potential order effect (Nilsson et al., 2020). This provides a potential mechanistic  
502 account for the observed cognitive benefits of simultaneous training, but the evidence base is still  
503 inconclusive and likely dependent on exercise intensity. Therefore, the optimal combination  
504 method remains an open question in the field, warranting head-to-head trials aiming to optimise  
505 efficacy and adherence while taking into account the feasibility of practical implementation.

506         Moreover, our results confirm that both simultaneous and sequential training augment the  
507 cognitive effects of physical exercise alone. While this is consistent with findings from previous  
508 meta-analyses (Gheysen et al., 2018; Zhu et al., 2016), the current network meta-analysis  
509 focusing specifically on RCTs and with moderate confidence ratings for the relevant  
510 comparisons provides more robust evidence on the benefits of enriching physical exercise with  
511 structured cognitive challenge in order to maximize cognitive gains.

512         For physical function, the results from the network meta-analysis showed comparable  
513 efficacy of simultaneous training, sequential training and physical exercise alone. This suggests  
514 that combining physical exercise with cognitive training, even in a simultaneous design, does not  
515 come at the cost of reduced efficacy of the physical intervention component. In contrast, the

516 cognitive and physical benefits of exergaming appear to be smaller than those of simultaneous  
517 and sequential training. One potential explanation for this observation is that the cognitive and  
518 physical demands of exergaming might be lower compared to more traditional cognitive and  
519 physical training. Our results contrast the medium-sized cognitive effect found for active  
520 videogames by Stanmore et al. (2017) and are closer to those reported in a re-analysis by Sala et  
521 al. (2019). While gamification of health interventions, such as exergaming, may facilitate  
522 intervention design characteristics that motivate behaviour change (Johnson et al., 2016),  
523 ensuring that the cognitive and physical demands of exergaming interventions match those of  
524 more traditional physical exercise and cognitive training interventions seems imperative.

525         From a clinical and practical perspective, the cognitive and physical improvements  
526 observed following simultaneous training are encouraging, since this is a time- and resource-  
527 effective approach for targeting multiple risk factors for cognitive and functional decline.  
528 Sequential physical and cognitive training interventions generally require high-frequency  
529 training, which may induce stress and fatigue reactions that counteract training effects (Lampit et  
530 al., 2014; Zhu et al., 2016). Additionally, it has been suggested that simultaneous training may  
531 have positive effects on training enjoyment, as compared to sequential training (McEwen et al.,  
532 2018) and physical exercise (Eggenberger et al., 2015a), although this issue needs further  
533 clarification. Based on the results from the sensitivity analyses, we found no evidence to suggest  
534 that simultaneous training is less feasible or efficacious for cognition in MCI compared to  
535 cognitively healthy older adults, indicating that this approach can be successfully implemented  
536 also for those with mildly impaired cognition. An important avenue for future research is to  
537 delineate the specific intervention characteristics of simultaneous training, such as physical and

538 cognitive training content, dose and frequency that are the most important for training  
539 effectiveness, to inform practical implementation.

540

#### 541 **4.2 Strengths and limitations**

542 To the best of our knowledge, this is the first systematic review and multivariate meta-  
543 analysis of RCTs investigating combined cognitive physical and cognitive training across a wide  
544 range of outcomes of relevance for health and functional independence in older age, thus  
545 providing a comprehensive synthesis of the current evidence-base for combined interventions.  
546 Moreover, our use of a network meta-analytical approach facilitates simultaneous treatment  
547 comparisons and improves precision of the effect size estimates (Salanti, 2012) and the current  
548 review is substantially larger than the previous network meta-analysis in the field (Bruderer-  
549 Hofstetter et al., 2018). This allows firmer conclusions regarding the comparative effectiveness  
550 and relative rankings of the different types of combined interventions, and evaluation of the  
551 confidence in the findings. Nevertheless, some limitations should be addressed. First, although  
552 we used stringent inclusion criteria to ensure that the interventions were reasonably similar  
553 across studies, the included treatments nevertheless consisted of a variety of physical exercise  
554 (e.g., aerobic, strength, mobility and balance) and cognitive training (e.g., computerized or non-  
555 computerized, targeting single or multiple cognitive domains, videogames) elements. This  
556 suggests that further dismantling of the specific cognitive and physical components that make up  
557 an effective combined intervention should be explored; this could be achieved through  
558 component network meta-analysis (Rücker et al., 2020b). Nevertheless, there was no substantial  
559 statistical heterogeneity or inconsistency in the results of the network meta-analyses and the  
560 certainty of the evidence was moderate to high for most comparisons of cognitive outcomes. In

561 contrast, the confidence in the results of the network meta-analysis for physical outcomes was  
562 low to very low for several of the comparisons, mainly owing to concerns regarding imprecision  
563 in the effect estimates and within-study bias. Thus, while these initial results are encouraging, the  
564 low certainty of the evidence for physical outcomes suggests that the relative treatment estimates  
565 may change as a consequence of future, high-quality research. Second, we did not identify  
566 enough studies for dementia and Parkinson's disease to allow for reliable pooling of the data.  
567 Consequently, further research is needed to establish the potential benefits and comparative  
568 efficacy of combined interventions for individuals with more prominent cognitive and/or  
569 physical impairment. Third, investigation of potential effect modifiers such as exercise type,  
570 intensity or training frequency was not feasible under the network meta-analysis framework due  
571 to insufficient number of studies within each node. Although a larger meta-analysis of physical  
572 exercise did not find evidence to support exercise modalities as a mediator of cognitive outcomes  
573 (Falck et al., 2019), such effects are likely and would be informative for future research and  
574 practice in the field. Additionally, the relevance of intervention settings and provision of social  
575 support should be explored; these considerations might be particularly relevant for individuals  
576 with cognitive and functional impairment. Fourth, trials that recruited community dwelling  
577 elderly participants did not always provide information on global cognitive status (e.g., Mini-  
578 Mental State Examination scores), and the methods for defining MCI varied across studies. Thus,  
579 some heterogeneity within these groups is likely. Future trials should make efforts to describe the  
580 cognitive status of participants and use established diagnostic criteria for MCI. Finally, this  
581 meta-analysis was restricted to investigation of post-intervention effects and the effects of  
582 combined interventions in the medium-long term should be explored.

583

584 **4.3 Conclusions**

585 Combined cognitive and physical training, delivered either simultaneously or  
586 sequentially, is efficacious in promoting both cognitive and physical health in older age, at least  
587 in the short term. These benefits were observed in cognitively healthy older adults, as well as for  
588 people with MCI. Simultaneous training showed comparable cognitive effects as sequential  
589 training and cognitive training alone, while also achieving similar physical improvements as  
590 physical exercise, suggesting this is a resource-effective approach for targeting multiple  
591 dementia risk factors. Exergaming interventions might incorporate elements from simultaneous  
592 training in game design to augment their cognitive and physical efficacy. More research is  
593 needed to establish whether cognitive and physical improvements following combined  
594 interventions translate into improved everyday function and well-being, particularly so for  
595 individuals with cognitive and functional impairment, as well as what specific components make  
596 up an effective combined intervention and what regimens are needed in order to maintain long-  
597 term gains.

598

599 **Acknowledgements:** We thank Sahar Aghajari for help with data entry and the authors of  
600 primary studies for providing data and advice. MLM was funded by a scholarship from  
601 Dementia Australia. ATW is funded by a grant from the Australian National Health and Medical  
602 Research Council (NHMRC GNT1171313). AL is funded by a CR Roper Fellowship from the  
603 University of Melbourne.

604 **Declarations of interest:** None



605 **References**

- 606 Adcock, M., Fankhauser, M., Post, J., Lutz, K., Zizlsperger, L., Luft, A.R., Guimaraes, V., Schattin, A.,  
607 de Bruin, E.D., 2020. Effects of an in-home multicomponent exergame training on physical  
608 functions, cognition, and brain volume of older adults: a randomized controlled trial. *Frontiers in*  
609 *Medicine* 6, 321.
- 610 Anderson-Hanley, C., Barcelos, N.M., Zimmerman, E.A., Gillen, R.W., Dunnam, M., Cohen, B.D.,  
611 Yerokhin, V., Miller, K.E., Hayes, D.J., Arciero, P.J., Maloney, M., Kramer, A.F., 2018. The  
612 Aerobic and Cognitive Exercise Study (ACES) for community-dwelling older adults with or at-  
613 risk for mild cognitive impairment (MCI): neuropsychological, neurobiological and neuroimaging  
614 outcomes of a randomized clinical trial. *Front. Aging Neurosci.* 10, 76.
- 615 Bacha, J.M.R., Gomes, G.C.V., de Freitas, T.B., Viveiro, L.A.P., da Silva, K.G., Bueno, G.C., Varise,  
616 E.M., Torriani-Pasin, C., Alonso, A.C., Luna, N.M.S., D'Andrea Greve, J.M., Pompeu, J.E.,  
617 2018. Effects of Kinect Adventures games versus conventional physical therapy on postural  
618 control in elderly people: a randomized controlled trial. *Games for Health Journal* 7, 24-36.
- 619 Barban, F., Annicchiarico, R., Melideo, M., Federici, A., Lombardi, M.G., Giuli, S., Ricci, C., Adriano,  
620 F., Griffini, I., Silvestri, M., Chiusso, M., Neglia, S., Arino-Blasco, S., Perez, R.C., Dionyssiotis,  
621 Y., Koumanakos, G., Kovaceic, M., Montero-Fernandez, N., Pino, O., Boye, N., Cortes, U.,  
622 Barrue, C., Cortes, A., Levene, P., Pantelopoulos, S., Rosso, R., Serra-Rexach, J.A., Sabatini,  
623 A.M., Caltagirone, C., 2017. Reducing fall risk with combined motor and cognitive training in  
624 elderly fallers. *Brain Sciences* 7.
- 625 Barcelos, N., Shah, N., Cohen, K., Hogan, M.J., Mulkerrin, E., Arciero, P.J., Cohen, B.D., Kramer, A.F.,  
626 Anderson-Hanley, C., 2015. Aerobic and Cognitive Exercise (ACE) pilot study for older adults:  
627 executive function improves with cognitive challenge while exergaming. *J. Int. Neuropsychol.*  
628 *Soc.* 21, 768-779.

- 629 Barnes, D.E., Santos-Modesitt, W., Poelke, G., Kramer, A.F., Castro, C., Middleton, L.E., Yaffe, K.,  
630 2013. The Mental Activity and eXercise (MAX) trial: A randomized controlled trial to enhance  
631 cognitive function in older adults. *JAMA Internal Medicine* 173, 797-804.
- 632 Boa Sorte Silva, N.C., Gill, D.P., Gregory, M.A., Bocti, J., Petrella, R.J., 2018a. Multiple-modality  
633 exercise and mind-motor training to improve mobility in older adults: a randomized controlled  
634 trial. *Exp. Gerontol.* 103, 17-26.
- 635 Boa Sorte Silva, N.C., Gill, D.P., Owen, A.M., Liu-Ambrose, T., Hachinski, V., Shigematsu, R., Petrella,  
636 R.J., 2018b. Cognitive changes following multiple-modality exercise and mind-motor training in  
637 older adults with subjective cognitive complaints: The M4 study. *PLoS One* 13, e0196356.
- 638 Boa Sorte Silva, N.C., Gregory, M.A., Gill, D.P., Petrella, R.J., 2017. Multiple-modality exercise and  
639 mind-motor training to improve cardiovascular health and fitness in older adults at risk for  
640 cognitive impairment: a randomized controlled trial. *Arch. Gerontol. Geriatr.* 68, 149-160.
- 641 Borenstein, M., Higgins, J.P., Hedges, L.V., Rothstein, H.R., 2017. Basics of meta-analysis: I(2) is not an  
642 absolute measure of heterogeneity. *Res Synth Methods* 8, 5-18.
- 643 Bruderer-Hofstetter, M., Rausch-Osthoff, A.K., Meichtry, A., Munzer, T., Niedermann, K., 2018.  
644 Effective multicomponent interventions in comparison to active control and no interventions on  
645 physical capacity, cognitive function and instrumental activities of daily living in elderly people  
646 with and without mild impaired cognition - A systematic review and network meta-analysis.  
647 *Ageing Research Reviews* 45, 1-14.
- 648 Combourieu Donnezan, L., Perrot, A., Belleville, S., Bloch, F., Kemoun, G., 2018. Effects of  
649 simultaneous aerobic and cognitive training on executive functions, cardiovascular fitness and  
650 functional abilities in older adults with mild cognitive impairment. *Mental Health and Physical  
651 Activity* 15, 78-87.
- 652 Damirchi, A., Hosseini, F., Babaei, P., 2018. Mental training enhances cognitive function and BDNF  
653 more than either physical or combined training in elderly women with MCI: a small-scale study.  
654 *Am. J. Alzheimers Dis. Other Demen.* 33, 20-29.

- 655 Delbroek, T., Vermeulen, W., Spildooren, J., 2017. The effect of cognitive-motor dual task training with  
656 the biorescue force platform on cognition, balance and dual task performance in institutionalized  
657 older adults: a randomized controlled trial. *J Phys Ther Sci* 29, 1137-1143.
- 658 Desjardins-Crepeau, L., Berryman, N., Fraser, S.A., Vu, T.T.M., Kergoat, M.J., Li, K.Z.H., Bosquet, L.,  
659 Bherer, L., 2016. Effects of combined physical and cognitive training on fitness and  
660 neuropsychological outcomes in healthy older adults. *Clin. Interv. Aging* 11, 1287-1299.
- 661 Eggenberger, P., Schumacher, V., Angst, M., Theill, N., de Bruin, E.D., 2015a. Does multicomponent  
662 physical exercise with simultaneous cognitive training boost cognitive performance in older  
663 adults? A 6-month randomized controlled trial with a 1-year follow-up. *Clin. Interv. Aging* 10,  
664 1335-1349.
- 665 Eggenberger, P., Theill, N., Holenstein, S., Schumacher, V., de Bruin, E.D., 2015b. Multicomponent  
666 physical exercise with simultaneous cognitive training to enhance dual-task walking of older  
667 adults: a secondary analysis of a 6-month randomized controlled trial with 1-year follow-up. *Clin.*  
668 *Interv. Aging* 10, 1711-1732.
- 669 Eggenberger, P., Wolf, M., Schumann, M., de Bruin, E.D., 2016. Exergame and balance training  
670 modulate prefrontal brain activity during walking and enhance executive function in older adults.  
671 *Front. Aging Neurosci.* 8, 66.
- 672 Egger, M., Davey Smith, G., Schneider, M., Minder, C., 1997. Bias in meta-analysis detected by a simple,  
673 graphical test. *BMJ* 315, 629-634.
- 674 Fabre, C., Chamari, K., Mucci, P., Masse-Biron, J., Prefaut, C., 2002. Improvement of cognitive function  
675 by mental and/or individualized aerobic training in healthy elderly subjects. *Int. J. Sports Med.*  
676 23, 415-421.
- 677 Falck, R.S., Davis, J.C., Best, J.R., Crockett, R.A., Liu-Ambrose, T., 2019. Impact of exercise training on  
678 physical and cognitive function among older adults: a systematic review and meta-analysis.  
679 *Neurobiol. Aging* 79, 119-130.

680 Fiatarone Singh, M.A., Gates, N., Saigal, N., Wilson, G.C., Meiklejohn, J., Brodaty, H., Wen, W., Singh,  
681 N., Baune, B.T., Suo, C., Baker, M.K., Foroughi, N., Wang, Y., Sachdev, P.S., Valenzuela, M.,  
682 2014. The Study of Mental and Resistance Training (SMART) study-resistance training and/or  
683 cognitive training in mild cognitive impairment: a randomized, double-blind, double-sham  
684 controlled trial. *J. Am. Med. Dir. Assoc.* 15, 873-880.

685 Firth, J., Stubbs, B., Vancampfort, D., Schuch, F., Lagopoulos, J., Rosenbaum, S., Ward, P.B., 2018.  
686 Effect of aerobic exercise on hippocampal volume in humans: a systematic review and meta-  
687 analysis. *Neuroimage* 166, 230-238.

688 Fisher, Z., Tipton, E., Zhipeng, H., 2017. robumeta: Robust variance meta-regression. R package version  
689 2.0.

690 Fissler, P., Kuster, O., Schlee, W., Kolassa, I.T., 2013. Novelty interventions to enhance broad cognitive  
691 abilities and prevent dementia: synergistic approaches for the facilitation of positive plastic  
692 change. *Prog. Brain Res.* 207, 403-434.

693 Fraser, S.A., Li, K.Z.-H., Berryman, N., Desjardins-Crépeau, L., Lussier, M., Vadaga, K., Lehr, L., Vu,  
694 M., Tuong, T., Bosquet, L., 2017. Does combined physical and cognitive training improve dual-  
695 task balance and gait outcomes in sedentary older adults? *Front. Hum. Neurosci.* 10, 688.

696 Gavelin, H.M., Lampit, A., Hallock, H., Sabates, J., Bahar-Fuchs, A., 2020. Cognition-Oriented  
697 Treatments for Older Adults: a Systematic Overview of Systematic Reviews. *Neuropsychol. Rev.*  
698 30, 167-193.

699 Gheysen, F., Poppe, L., DeSmet, A., Swinnen, S., Cardon, G., De Bourdeaudhuij, I., Chastin, S., Fias, W.,  
700 2018. Physical activity to improve cognition in older adults: can physical activity programs  
701 enriched with cognitive challenges enhance the effects? A systematic review and meta-analysis.  
702 *International Journal of Behavioral Nutrition and Physical Activity* 15.

703 Gschwind, Y.J., Eichberg, S., Ejupi, A., de Rosario, H., Kroll, M., Marston, H.R., Drobnics, M., Annegarn,  
704 J., Wieching, R., Lord, S.R., Aal, K., Vaziri, D., Woodbury, A., Fink, D., Delbaere, K., 2015.

- 705 ICT-based system to predict and prevent falls (iStoppFalls): results from an international  
706 multicenter randomized controlled trial. *Eur. Rev. Aging Phys. Act.* 12, 10.
- 707 Hagovska, M., Nagyova, I., 2017. The transfer of skills from cognitive and physical training to activities  
708 of daily living: a randomised controlled study. *European journal of ageing* 14, 133-142.
- 709 Hagovska, M., Olekszyova, Z., 2016. Impact of the combination of cognitive and balance training on gait,  
710 fear and risk of falling and quality of life in seniors with mild cognitive impairment. *Geriatrics  
711 and Gerontology International* 16, 1043-1050.
- 712 Hagovska, M., Takáč, P., Dzvonik, O., 2016. Effect of a combining cognitive and balanced training on  
713 the cognitive, postural and functional status of seniors with a mild cognitive deficit in a  
714 randomized, controlled trial. *Eur. J. Phys. Rehabil. Med.* 52, 101-109.
- 715 Hedges, L.V., Tipton, E., Johnson, M.C., 2010. Robust variance estimation in meta-regression with  
716 dependent effect size estimates. *Res Synth Methods* 1, 39-65.
- 717 Heffernan, M., Andrews, G., Fiatarone Singh, M.A., Valenzuela, M., Anstey, K.J., Maeder, A.J., McNeil,  
718 J., Jorm, L., Lautenschlager, N.T., Sachdev, P.S., Ginige, J.A., Hobbs, M.J., Boulamatsis, C.,  
719 Chau, T., Cobiac, L., Cox, K.L., Daniel, K., Flood, V.M., Guerrero, Y., Gunn, J., Jain, N.,  
720 Kochan, N.A., Lampit, A., Mavros, Y., Meiklejohn, J., Noble, Y., O'Leary, F., Radd-Vagenas, S.,  
721 Walton, C.C., Maintain Your Brain Collaborative, T., Brodaty, H., 2019. Maintain Your Brain:  
722 Protocol of a 3-Year Randomized Controlled Trial of a Personalized Multi-Modal Digital Health  
723 Intervention to Prevent Cognitive Decline Among Community Dwelling 55 to 77 Year Olds. *J.  
724 Alzheimers Dis.* 70, S221-S237.
- 725 Hill, N.T., Mowszowski, L., Naismith, S.L., Chadwick, V.L., Valenzuela, M., Lampit, A., 2017.  
726 Computerized cognitive training in older adults with mild cognitive impairment or dementia: A  
727 systematic review and meta-analysis. *Am. J. Psychiatry* 174, 329-340.
- 728 Hiyamizu, M., Morioka, S., Shomoto, K., Shimada, T., 2012. Effects of dual task balance training on dual  
729 task performance in elderly people: a randomized controlled trial. *Clin. Rehabil.* 26, 58-67.

- 730 Htut, T.Z.C., Hiengkaew, V., Jalayondeja, C., Vongsirinavarat, M., 2018. Effects of physical, virtual  
731 reality-based, and brain exercise on physical, cognition, and preference in older persons: a  
732 randomized controlled trial. *Eur. Rev. Aging Phys. Act.* 15, 10.
- 733 Hughes, T.F., Flatt, J.D., Fu, B., Butters, M.A., Chang, C.C.H., Ganguli, M., 2014. Interactive video  
734 gaming compared with health education in older adults with mild cognitive impairment: A  
735 feasibility study. *Int. J. Geriatr. Psychiatry* 29, 890-898.
- 736 Hutton, B., Salanti, G., Caldwell, D.M., Chaimani, A., Schmid, C.H., Cameron, C., Ioannidis, J.P., Straus,  
737 S., Thorlund, K., Jansen, J.P., Mulrow, C., Catala-Lopez, F., Gotzsche, P.C., Dickersin, K.,  
738 Boutron, I., Altman, D.G., Moher, D., 2015. The PRISMA extension statement for reporting of  
739 systematic reviews incorporating network meta-analyses of health care interventions: checklist  
740 and explanations. *Ann. Intern. Med.* 162, 777-784.
- 741 Johnson, D., Deterding, S., Kuhn, K.A., Staneva, A., Stoyanov, S., Hides, L., 2016. Gamification for  
742 health and wellbeing: A systematic review of the literature. *Internet Interventions* 6, 89-106.
- 743 Karssemeijer, E.G.A., Aaronson, J.A., Bossers, W.J., Smits, T., Olde Rikkert, M.G.M., Kessels, R.P.C.,  
744 2017. Positive effects of combined cognitive and physical exercise training on cognitive function  
745 in older adults with mild cognitive impairment or dementia: A meta-analysis. *Ageing Research*  
746 *Reviews* 40, 75-83.
- 747 Karssemeijer, E.G.A., Aaronson, J.A., Bossers, W.J.R., Donders, R., Olde Rikkert, M.G.M., Kessels,  
748 R.P.C., 2019. The quest for synergy between physical exercise and cognitive stimulation via  
749 exergaming in people with dementia: a randomized controlled trial. *Alzheimers Research &*  
750 *Therapy* 11, 3.
- 751 Kempermann, G., Fabel, K., Ehninger, D., Babu, H., Leal-Galicia, P., Garthe, A., Wolf, S.A., 2010. Why  
752 and how physical activity promotes experience-induced brain plasticity. *Front. Neurosci.* 4, 189.
- 753 Kitazawa, K., Showa, S., Hiraoka, A., Fushiki, Y., Sakauchi, H., Mori, M., 2015. Effect of a dual-task  
754 net-step exercise on cognitive and gait function in older adults. *J. Geriatr. Phys. Ther.* 38, 133-  
755 140.

- 756 Kivipelto, M., Mangialasche, F., Snyder, H.M., Allegri, R., Andrieu, S., Arai, H., Baker, L., Belleville, S.,  
757 Brodaty, H., Brucki, S.M., Calandri, I., Caramelli, P., Chen, C., Chertkow, H., Chew, E., Choi,  
758 S.H., Chowdhary, N., Crivelli, L., Torre, R., Du, Y., Dua, T., Espeland, M., Feldman, H.H.,  
759 Hartmanis, M., Hartmann, T., Heffernan, M., Henry, C.J., Hong, C.H., Hakansson, K., Iwatsubo,  
760 T., Jeong, J.H., Jimenez-Maggiora, G., Koo, E.H., Launer, L.J., Lehtisalo, J., Lopera, F.,  
761 Martinez-Lage, P., Martins, R., Middleton, L., Molinuevo, J.L., Montero-Odasso, M., Moon,  
762 S.Y., Morales-Perez, K., Nitrini, R., Nygaard, H.B., Park, Y.K., Peltonen, M., Qiu, C., Quiroz,  
763 Y.T., Raman, R., Rao, N., Ravindranath, V., Rosenberg, A., Sakurai, T., Salinas, R.M., Scheltens,  
764 P., Sevlever, G., Soininen, H., Sosa, A.L., Suemoto, C.K., Tainta-Cuezva, M., Velilla, L., Wang,  
765 Y., Whitmer, R., Xu, X., Bain, L.J., Solomon, A., Ngandu, T., Carrillo, M.C., 2020. World-Wide  
766 FINGERS Network: A global approach to risk reduction and prevention of dementia. *Alzheimer's*  
767 *& dementia : the journal of the Alzheimer's Association* 16, 1078-1094.
- 768 Knaepen, K., Goekint, M., Heyman, E.M., Meeusen, R., 2010. Neuroplasticity - exercise-induced  
769 response of peripheral brain-derived neurotrophic factor: a systematic review of experimental  
770 studies in human subjects. *Sports Med.* 40, 765-801.
- 771 Laatar, R., Kachouri, H., Borji, R., Rebai, H., Sahli, S., 2018. Combined physical-cognitive training  
772 enhances postural performances during daily life tasks in older adults. *Exp. Gerontol.* 107, 91-97.
- 773 Lampit, A., Hallock, H., Valenzuela, M., 2014. Computerized cognitive training in cognitively healthy  
774 older adults: a systematic review and meta-analysis of effect modifiers. *PLoS Med.* 11, e1001756.
- 775 Legault, C., Jennings, J.M., Katula, J.A., Dagenbach, D., Gaussoin, S.A., Sink, K.M., Rapp, S.R., Rejeski,  
776 W.J., Shumaker, S.A., Espeland, M.A., Group, S.-P.S., 2011. Designing clinical trials for  
777 assessing the effects of cognitive training and physical activity interventions on cognitive  
778 outcomes: the Seniors Health and Activity Research Program Pilot (SHARP-P) study, a  
779 randomized controlled trial. *BMC Geriatr.* 11, 27.
- 780 Leon, J., Urena, A., Bolanos, M.J., Bilbao, A., Ona, A., 2015. A combination of physical and cognitive  
781 exercise improves reaction time in persons 61-84 years old. *J. Aging Phys. Act.* 23, 72-77.

- 782 Leung, I.H., Walton, C.C., Hallock, H., Lewis, S.J., Valenzuela, M., Lampit, A., 2015. Cognitive training  
783 in Parkinson disease: A systematic review and meta-analysis. *Neurology* 85, 1843-1851.
- 784 Liberati, A., Altman, D.G., Tetzlaff, J., Mulrow, C., Gotzsche, P.C., Ioannidis, J.P., Clarke, M.,  
785 Devereaux, P.J., Kleijnen, J., Moher, D., 2009. The PRISMA statement for reporting systematic  
786 reviews and meta-analyses of studies that evaluate health care interventions: explanation and  
787 elaboration. *PLoS Med.* 6, e1000100.
- 788 Linde, K., Alfermann, D., 2014. Single versus combined cognitive and physical activity effects on fluid  
789 cognitive abilities of healthy older adults: a 4-month randomized controlled trial with follow-up.  
790 *J. Aging Phys. Act.* 22, 302-313.
- 791 Livingston, G., Huntley, J., Sommerlad, A., Ames, D., Ballard, C., Banerjee, S., Brayne, C., Burns, A.,  
792 Cohen-Mansfield, J., Cooper, C., Costafreda, S.G., Dias, A., Fox, N., Gitlin, L.N., Howard, R.,  
793 Kales, H.C., Kivimaki, M., Larson, E.B., Ogunniyi, A., Orgeta, V., Ritchie, K., Rockwood, K.,  
794 Sampson, E.L., Samus, Q., Schneider, L.S., Selbaek, G., Teri, L., Mukadam, N., 2020a. Dementia  
795 prevention, intervention, and care: 2020 report of the Lancet Commission. *Lancet*.
- 796 Livingston, G., Huntley, J., Sommerlad, A., Ames, D., Ballard, C., Banerjee, S., Brayne, C., Burns, A.,  
797 Cohen-Mansfield, J., Cooper, C., Costafreda, S.G., Dias, A., Fox, N., Gitlin, L.N., Howard, R.,  
798 Kales, H.C., Kivimaki, M., Larson, E.B., Ogunniyi, A., Orgeta, V., Ritchie, K., Rockwood, K.,  
799 Sampson, E.L., Samus, Q., Schneider, L.S., Selbaek, G., Teri, L., Mukadam, N., 2020b. Dementia  
800 prevention, intervention, and care: 2020 report of the Lancet Commission. *Lancet* 396, 413-446.
- 801 Lustig, C., Shah, P., Seidler, R., Reuter-Lorenz, P.A., 2009. Aging, training, and the brain: a review and  
802 future directions. *Neuropsychol. Rev.* 19, 504-522.
- 803 Maffei, L., Picano, E., Andreassi, M., Angelucci, A., Baldacci, F., Baroncelli, L., Begenisic, T., Bellinvia,  
804 P., Berardi, N., Biagi, L., 2017. Randomized trial on the effects of a combined physical/cognitive  
805 training in aged MCI subjects: the Train the Brain study. *Sci. Rep.* 7, 39471.
- 806 Maillot, P., Perrot, A., Hartley, A., 2012. Effects of interactive physical-activity video-game training on  
807 physical and cognitive function in older adults. *Psychol. Aging* 27, 589-600.



808 Mavros, Y., Gates, N., Wilson, G.C., Jain, N., Meiklejohn, J., Brodaty, H., Wen, W., Singh, N., Baune,  
809 B.T., Suo, C., Baker, M.K., Foroughi, N., Wang, Y., Sachdev, P.S., Valenzuela, M., Fiatarone  
810 Singh, M.A., 2017. Mediation of cognitive function improvements by strength gains after  
811 resistance training in older adults with mild cognitive impairment: outcomes of the study of  
812 mental and resistance training. *J. Am. Geriatr. Soc.* 65, 550-559.

813 McDaniel, M.A., Binder, E.F., Bugg, J.M., Waldum, E.R., Dufault, C., Meyer, A., Johanning, J., Zheng,  
814 J., Schechtman, K.B., Kudelka, C., 2014. Effects of cognitive training with and without aerobic  
815 exercise on cognitively demanding everyday activities. *Psychol. Aging* 29, 717-730.

816 McEwen, S.C., Siddarth, P., Abedelsater, B., Kim, Y., Mui, W., Wu, P., Emerson, N.D., Lee, J.,  
817 Greenberg, S., Shelton, T., Kaiser, S., Small, G.W., Merrill, D.A., 2018. Simultaneous Aerobic  
818 Exercise and Memory Training Program in Older Adults with Subjective Memory Impairments.  
819 *J. Alzheimers Dis.* 62, 795-806.

820 Middleton, L.E., Ventura, M.I., Santos-Modesitt, W., Poelke, G., Yaffe, K., Barnes, D.E., 2018. The  
821 Mental Activity and eXercise (MAX) trial: effects on physical function and quality of life among  
822 older adults with cognitive complaints. *Contemp. Clin. Trials* 64, 161-166.

823 Mrakic-Sposta, S., Di Santo, S.G., Franchini, F., Arlati, S., Zangiacomi, A., Greci, L., Moretti, S.,  
824 Jesuthasan, N., Marzorati, M., Rizzo, G., Sacco, M., Vezzoli, A., 2018. Effects of combined  
825 physical and cognitive virtual reality-based training on cognitive impairment and oxidative stress  
826 in MCI patients: a pilot study. *Front. Aging Neurosci.* 10, 282.

827 Ngandu, T., Lehtisalo, J., Solomon, A., Levalahti, E., Ahtiluoto, S., Antikainen, R., Backman, L.,  
828 Hanninen, T., Jula, A., Laatikainen, T., Lindstrom, J., Mangialasche, F., Pajananen, T., Pajala, S.,  
829 Peltonen, M., Rauramaa, R., Stigsdotter-Neely, A., Strandberg, T., Tuomilehto, J., Soininen, H.,  
830 Kivipelto, M., 2015. A 2 year multidomain intervention of diet, exercise, cognitive training, and  
831 vascular risk monitoring versus control to prevent cognitive decline in at-risk elderly people  
832 (FINGER): a randomised controlled trial. *Lancet* 385, 2255-2263.

- 833 Nikolakopoulou, A., Higgins, J.P.T., Papakonstantinou, T., Chaimani, A., Del Giovane, C., Egger, M.,  
834 Salanti, G., 2020. CINeMA: An approach for assessing confidence in the results of a network  
835 meta-analysis. *PLoS Med.* 17, e1003082.
- 836 Nilsson, J., Ekblom, O., Ekblom, M., Lebedev, A., Tarassova, O., Moberg, M., Lovden, M., 2020. Acute  
837 increases in brain-derived neurotrophic factor in plasma following physical exercise relates to  
838 subsequent learning in older adults. *Sci. Rep.* 10, 4395.
- 839 Nishiguchi, S., Yamada, M., Tanigawa, T., Sekiyama, K., Kawagoe, T., Suzuki, M., Yoshikawa, S., Abe,  
840 N., Otsuka, Y., Nakai, R., Aoyama, T., Tsuboyama, T., 2015. A 12-week physical and cognitive  
841 exercise program can improve cognitive function and neural efficiency in community-dwelling  
842 older adults: a randomized controlled trial. *J. Am. Geriatr. Soc.* 63, 1355-1363.
- 843 Norouzi, E., Vaezmosavi, M., Gerber, M., Puhse, U., Brand, S., 2019. Dual-task training on cognition and  
844 resistance training improved both balance and working memory in older people. *The Physician  
845 and Sportsmedicine* 47, 471-478.
- 846 Northey, J.M., Cherbuin, N., Pumpa, K.L., Smee, D.J., Rattray, B., 2018. Exercise interventions for  
847 cognitive function in adults older than 50: a systematic review with meta-analysis. *British  
848 Journal of Sports Medicine* 52, 154-160.
- 849 Papakonstantinou, T., Nikolakopoulou, A., Higgins, J.P., Egger, M., Salanti, G., 2020. CINeMA:  
850 Software for semiautomated assessment of the confidence in the results of network  
851 meta-analysis. *Campbell Systematic Reviews* 16, e1080.
- 852 Park, H., Park, J.H., Na, H.R., Hiroyuki, S., Kim, G.M., Jung, M.K., Kim, W.K., Park, K.W., 2019.  
853 Combined intervention of physical activity, aerobic exercise, and cognitive exercise intervention  
854 to prevent cognitive decline for patients with mild cognitive impairment: a randomized controlled  
855 clinical study. *J* 8, 940.
- 856 Petersen, R.C., Lopez, O., Armstrong, M.J., Getchius, T.S.D., Ganguli, M., Gloss, D., Gronseth, G.S.,  
857 Marson, D., Pringsheim, T., Day, G.S., Sager, M., Stevens, J., Rae-Grant, A., 2018. Practice  
858 guideline update summary: Mild cognitive impairment. *Neurology* 90, 126-135.

- 859 Pompeu, J.E., Mendes, F.A., Silva, K.G., Lobo, A.M., Oliveira Tde, P., Zomignani, A.P., Piemonte, M.E.,  
860 2012. Effect of Nintendo Wii-based motor and cognitive training on activities of daily living in  
861 patients with Parkinson's disease: a randomised clinical trial. *Physiotherapy* 98, 196-204.
- 862 Pustejovsky, J., 2020. clubSandwich: Cluster-robust (sandwich) variance estimators with small-sample  
863 corrections. R package version 0.4.2.
- 864 Rahe, J., Becker, J., Fink, G.R., Kessler, J., Kukulja, J., Rahn, A., Rosen, J.B., Szabados, F., Wirth, B.,  
865 Kalbe, E., 2015. Cognitive training with and without additional physical activity in healthy older  
866 adults: Cognitive effects, neurobiological mechanisms, and prediction of training success. *Front.*  
867 *Aging Neurosci.* 7, 187.
- 868 Reigal, R., Mendo, A.H., 2014. Efectos de un programa cognitivo-motriz sobre la función ejecutiva en  
869 una muestra de personas mayores. *RICYDE. Revista Internacional de Ciencias del Deporte* 10,  
870 206-220.
- 871 Rezola-Pardo, C., Arrieta, H., Gil, S.M., Zarrazquin, I., Yanguas, J.J., Lopez, M.A., Irazusta, J.,  
872 Rodriguez-Larrad, A., 2019. Comparison between multicomponent and simultaneous dual-task  
873 exercise interventions in long-term nursing home residents: the Ageing-ONDUAL-TASK  
874 randomized controlled study. *Age Ageing* 48, 817-823.
- 875 Riley, R.D., Higgins, J.P., Deeks, J.J., 2011. Interpretation of random effects meta-analyses. *BMJ* 342,  
876 d549.
- 877 Romera-Liebana, L., Orfila, F., Segura, J.M., Real, J., Fabra, M.L., Moller, M., Lancho, S., Ramirez, A.,  
878 Marti, N., Cullell, M., Bastida, N., Martinez, D., Gine, M., Cendros, P., Bistuer, A., Perez, E.,  
879 Fabregat, M.A., Foz, G., 2018. Effects of a primary care-based multifactorial intervention on  
880 physical and cognitive function in frail, elderly individuals: a randomized controlled trial.  
881 *Journals of Gerontology: Medical Sciences* 73, 1688-1674.
- 882 Rucker, G., Krahn, U., König, J., Efthimiou, O., Schwarzer, G., 2020a. netmeta: Network meta-analysis  
883 using frequentist methods. R package. Version 1.2-1.

- 884 Rucker, G., Petropoulou, M., Schwarzer, G., 2020b. Network meta-analysis of multicomponent  
885 interventions. *Biom J* 62, 808-821.
- 886 Rucker, G., Schwarzer, G., 2015. Ranking treatments in frequentist network meta-analysis works without  
887 resampling methods. *BMC Med. Res. Methodol.* 15, 58.
- 888 Sala, G., Tatlidil, K.S., Gobet, F., 2019. Still no evidence that exergames improve cognitive ability: A  
889 commentary on Stanmore et al. (2017). *Neurosci. Biobehav. Rev.*
- 890 Salanti, G., 2012. Indirect and mixed-treatment comparison, network, or multiple-treatments meta-  
891 analysis: many names, many benefits, many concerns for the next generation evidence synthesis  
892 tool. *Research Synthesis Methods* 3, 80-97.
- 893 Schattin, A., Arner, R., Gennaro, F., de Bruin, E.D., 2016. Adaptations of prefrontal brain activity,  
894 executive functions, and gait in healthy elderly following exergame and balance training: A  
895 randomized-controlled study. *Front. Aging Neurosci.* 8, 278.
- 896 Schoene, D., Lord, S.R., Delbaere, K., Severino, C., Davies, T.A., Smith, S.T., 2013. A randomized  
897 controlled pilot study of home-based step training in older people using videogame technology.  
898 *PLoS One* 8, e57734.
- 899 Schoene, D., Valenzuela, T., Toson, B., Delbaere, K., Severino, C., Garcia, J., Davies, T.A., Russell, F.,  
900 Smith, S.T., Lord, S.R., 2015. Interactive cognitive-motor step training improves cognitive risk  
901 factors of falling in older adults - a randomized controlled trial. *PLoS One* 10, e0145161.
- 902 Shatil, E., 2013. Does combined cognitive training and physical activity training enhance cognitive  
903 abilities more than either alone? A four-condition randomized controlled trial among healthy  
904 older adults. *Front. Aging Neurosci.* 5, 8.
- 905 Shimada, H., Makizako, H., Doi, T., Park, H., Tsutsumimoto, K., Verghese, J., Suzuki, T., 2018. Effects  
906 of combined physical and cognitive exercises on cognition and mobility in patients with mild  
907 cognitive impairment: a randomized clinical trial. *J. Am. Med. Dir. Assoc.* 19, 584-591.
- 908 Song, J., Paul, S.S., Caetano, M.J.D., Smith, S., Dibble, L.E., Love, R., Schoene, D., Menant, J.C.,  
909 Sherrington, C., Lord, S.R., Canning, C.G., Allen, N.E., 2018. Home-based step training using

910 videogame technology in people with Parkinson's disease: A single-blinded randomised  
911 controlled trial. *Clin. Rehabil.* 32, 299-311.

912 Stanmore, E., Mavroei, A., de Jong, L.D., Skelton, D.A., Sutton, C.J., Benedetto, V., Munford, L.A.,  
913 Meekes, W., Bell, V., Todd, C., 2019. The effectiveness and cost-effectiveness of strength and  
914 balance Exergames to reduce falls risk for people aged 55 years and older in UK assisted living  
915 facilities: a multi-centre, cluster randomised controlled trial. *BMC Med.* 17, 49.

916 Stanmore, E., Stubbs, B., Vancampfort, D., de Bruin, E.D., Firth, J., 2017. The effect of active video  
917 games on cognitive functioning in clinical and non-clinical populations: A meta-analysis of  
918 randomized controlled trials. *Neurosci. Biobehav. Rev.* 78, 34-43.

919 Sterne, J.A., Savovic, J., Page, M.J., Elbers, R.G., Blencowe, N.S., Boutron, I., Cates, C.J., Cheng, H.Y.,  
920 Corbett, M.S., Eldridge, S.M., Emberson, J.R., Hernan, M.A., Hopewell, S., Hrobjartsson, A.,  
921 Junqueira, D.R., Juni, P., Kirkham, J.J., Lasserson, T., Li, T., McAleenan, A., Reeves, B.C.,  
922 Shepperd, S., Shrier, I., Stewart, L.A., Tilling, K., White, I.R., Whiting, P.F., Higgins, J.P.T.,  
923 2019. RoB 2: a revised tool for assessing risk of bias in randomised trials. *BMJ* 366, 14898.

924 Sterne, J.A., Sutton, A.J., Ioannidis, J.P., Terrin, N., Jones, D.R., Lau, J., Carpenter, J., Rucker, G.,  
925 Harbord, R.M., Schmid, C.H., Tetzlaff, J., Deeks, J.J., Peters, J., Macaskill, P., Schwarzer, G.,  
926 Duval, S., Altman, D.G., Moher, D., Higgins, J.P., 2011. Recommendations for examining and  
927 interpreting funnel plot asymmetry in meta-analyses of randomised controlled trials. *BMJ* 343,  
928 d4002.

929 Ten Brinke, L.F., Best, J.R., Chan, J.L.C., Ghag, C., Erickson, K.I., Handy, T.C., Liu-Ambrose, T., 2019.  
930 The effects of computerized cognitive training with and without physical exercise on cognitive  
931 function in older adults: an 8-week randomized controlled trial. *J. Gerontol. A Biol. Sci. Med.*  
932 *Sci.* 04, 755-763.

933 van Balkom, T.D., van den Heuvel, O.A., Berendse, H.W., van der Werf, Y.D., Vriend, C., 2020. The  
934 Effects of Cognitive Training on Brain Network Activity and Connectivity in Aging and  
935 Neurodegenerative Diseases: a Systematic Review. *Neuropsychol. Rev.* 30, 267-286.

- 936 van het Reve, E., de Bruin, E.D., 2014. Strength-balance supplemented with computerized cognitive  
937 training to improve dual task gait and divided attention in older adults: a multicenter randomized-  
938 controlled trial. *BMC Geriatr.* 14, 134.
- 939 Webb, S.L., Loh, V., Lampit, A., Bateman, J.E., Birney, D.P., 2018. Meta-Analysis of the Effects of  
940 Computerized Cognitive Training on Executive Functions: a Cross-Disciplinary Taxonomy for  
941 Classifying Outcome Cognitive Factors. *Neuropsychol. Rev.* 28, 232-250.
- 942 World Health Organization and Alzheimer's Disease International, 2012. Dementia: a public health  
943 priority. World Health Organization, Geneva, p. 112.
- 944 Yang, C., Moore, A., Mpofu, E., Dorstyn, D., Li, Q., Yin, C., 2019. Effectiveness of combined cognitive  
945 and physical interventions to enhance functioning in older adults with mild cognitive impairment:  
946 a systematic review of randomized controlled trials. *Gerontologist.*
- 947 Zhu, X.Y., Yin, S.F., Lang, M.J., He, R.Q., Li, J., 2016. The more the better? A meta-analysis on effects  
948 of combined cognitive and physical intervention on cognition in healthy older adults. *Ageing  
949 Research Reviews* 31, 67-79.
- 950

**Table 1.** Characteristics of Included Studies

| Study                             | Population                                 | n   | Age  | % female | MMSE (or equivalent)     | Cognitive Intervention Component                               | Physical Intervention Component                   | Combination method | Supervision  | Duration | Sessions / week | Session length (min)                       | Dose (hrs) | Comparison group(s)                                                                                                             | Country                      |
|-----------------------------------|--------------------------------------------|-----|------|----------|--------------------------|----------------------------------------------------------------|---------------------------------------------------|--------------------|--------------|----------|-----------------|--------------------------------------------|------------|---------------------------------------------------------------------------------------------------------------------------------|------------------------------|
| Adcock et al. (2020)              | Cognitively healthy                        | 31  | 73.9 | 52       | 29.05                    | Step-based cognitive exercises                                 | Tai Chi, dancing, step training                   | Exergaming         | Unsupervised | 16       | 3               | 30                                         | 24         | Passive control                                                                                                                 | Switzerland                  |
| Anderson-Hanley et al. (2018)     | MCI                                        | 13  | 78.1 | 50       | 21.8 (MoCA)              | Cybercycling exergame                                          | Cycling                                           | Exergaming         | Supervised   | 24       | 4               | 45                                         | 72         | PE: Cycling with scenic bike tour                                                                                               | USA                          |
| Bacha et al. (2018)               | Cognitively healthy                        | 46  | 68   | 34       | 23.00 (MoCA)             | Kinect Adventure games                                         | Kinect Adventure games                            | Exergaming         | Supervised   | 7        | 2               | 60                                         | 14         | PE: Balance and strength                                                                                                        | Brazil                       |
| Barban et al. (2017)              | Cognitively healthy (at risk of falls)     | 481 | 75   | 65       | ≥20                      | Multidomain CCT                                                | Motor training                                    | Sequential         | Supervised   | 12       | 2               | 60 (CT: 30, PE: 30)                        | 24         | CT: Multidomain CCT<br>PE: Motor training<br>Sham: Data entry on computer                                                       | Italy, Greece, Spain, Serbia |
| Barcelos et al. (2015)            | MCI                                        | 17  | 85.1 | 56       | 22.6 (MoCA)              | Cybercycling exergame                                          | Cycling                                           | Exergaming         | Supervised   | 12       | 2-5             | 20 – 45                                    | 18         | PE: Cycling with scenic bike tour                                                                                               | USA, Ireland                 |
| Barnes et al. (2013)              | Cognitively healthy (cognitive complaints) | 126 | 73.4 | 63       | 28.34 (3MS) <sup>a</sup> | Multidomain CCT                                                | Aerobic and strength                              | Sequential         | Supervised   | 12       | 6 (CT:3, PE: 3) | 60                                         | 72         | CT: Multidomain CCT + stretching<br>PE: Aerobic and strength training + educational DVDs<br>Sham: Educational DVDs + stretching | USA                          |
| Boa Sorte Silva et al. (2018b)    | Cognitively healthy (cognitive complaints) | 127 | 67.5 | 45       | 29.1                     | Square-stepping exercise, memorizing complex stepping patterns | Aerobic, resistance and stepping training         | Simultaneous       | Supervised   | 24       | 3               | 60                                         | 72         | PE: Aerobic, resistance and balance                                                                                             | Canada                       |
| Combourieu Donnezan et al. (2018) | MCI                                        | 69  | 76.7 | Nr       | 27.78                    | Multidomain CCT                                                | Aerobic training on bikes                         | Simultaneous       | Supervised   | 12       | 2               | 60                                         | 24         | CT: Multidomain CCT<br>PE: Aerobic training on bikes<br>Passive control                                                         | France                       |
| Damirchi et al. (2018)            | MCI                                        | 44  | 68.3 | 100      | 23.43                    | Multidomain CCT                                                | Aerobic exercise, muscular strength and movements | Sequential         | Supervised   | 8        | 3               | 60 (CT: 30, PE: 30) - 120 (CT: 60, PE: 60) | 36         | CT: Multidomain CCT<br>PE: Aerobic and strength<br>Passive control                                                              | Iran                         |

|                                  |                     |     |      |    |              |                                                                                                     |                                                                                                       |                                                  |              |    |                  |                      |    |                                                                                                                                      |                           |
|----------------------------------|---------------------|-----|------|----|--------------|-----------------------------------------------------------------------------------------------------|-------------------------------------------------------------------------------------------------------|--------------------------------------------------|--------------|----|------------------|----------------------|----|--------------------------------------------------------------------------------------------------------------------------------------|---------------------------|
| Delbroek et al. (2017)           | MCI                 | 17  | 87.2 | 65 | 17.25 (MoCA) | BioRescue platform training memory, attention and dual tasking                                      | Balance and weight bearing                                                                            | Exergaming                                       | Supervised   | 6  | 2                | 18-30                | 5  | Passive control                                                                                                                      | Belgium                   |
| Desjardins-Crepeau et al. (2016) | Cognitively healthy | 76  | 72.4 | 70 | 28.89        | Single domain CCT (dual task)                                                                       | Treadmill walking and resistance training                                                             | Sequential                                       | Supervised   | 12 | 3 (CT: 1, PE: 2) | 60                   | 36 | CT: Single domain CCT + Stretching/toning<br>PE: Aerobic/resistance + computer lessons<br>Sham: Stretching/toning + computer lessons | Canada                    |
| Eggenberger et al. (2015a)       | Cognitively healthy | 71  | 78.9 | 65 | 28.23        | Group 1: Videogame dancing<br><br>Group 2: Verbal memory training                                   | Group 1: Videogame dancing<br><br>Group 2: Treadmill walking<br><br>Both groups: strength and balance | Group 1: Exergaming<br><br>Group 2: Simultaneous | Supervised   | 26 | 2                | 60                   | 52 | PE: Treadmill walking, strength and balance                                                                                          | Switzerland               |
| Eggenberger et al. (2016)        | Cognitively healthy | 33  | 74.9 | 64 | 26.24 (MoCA) | Videogame dancing                                                                                   | Videogame dancing                                                                                     | Exergaming                                       | Supervised   | 8  | 3                | 30                   | 12 | PE: Balance and stretching                                                                                                           | Switzerland               |
| Fabre et al. (2002)              | Cognitively healthy | 32  | 65.9 | 84 | Nr           | Multidomain CT                                                                                      | Aerobic exercise                                                                                      | Sequential                                       | Supervised   | 8  | 3 (CT: 1, PE: 2) | CT: 90<br>PE: 60     | 28 | CT: Multidomain CT<br>PE: Aerobic exercise<br>Sham: Leisure activities                                                               | France                    |
| Fiatarone Singh et al. (2014)    | MCI                 | 100 | 70.1 | 68 | 27           | Multidomain CCT                                                                                     | Progressive resistance training                                                                       | Sequential                                       | Supervised   | 26 | 2                | 100 (PE: 50, CT: 50) | 86 | CT: Multidomain CCT + stretching<br>PE: Progressive resistance training + documentaries<br>Sham: Documentaries + stretching          | Australia                 |
| Gschwind et al. (2015)           | Cognitively healthy | 153 | 74.7 | 61 | Nr           | iStoppFalls exergame with additional cognitive tasks in higher levels (semantic and working memory) | Strength and balance                                                                                  | Exergaming                                       | Unsupervised | 16 | 3                | 60                   | 48 | Passive control:<br>Education booklet                                                                                                | Germany, Spain, Australia |



|                            |                     |     |      |    |                              |                                                                                                                          |                            |              |            |    |                     |                         |    |                                                                                    |                 |
|----------------------------|---------------------|-----|------|----|------------------------------|--------------------------------------------------------------------------------------------------------------------------|----------------------------|--------------|------------|----|---------------------|-------------------------|----|------------------------------------------------------------------------------------|-----------------|
| Hagovska et al. (2016)     | MCI                 | 80  | 67   | 49 | 26.4                         | Multidomain CCT with cognitive-motor elements                                                                            | Dynamic balance training   | Sequential   | Supervised | 10 | 9<br>(CT: 2, PE: 7) | 30                      | 45 | PE: Dynamic balance training                                                       | Slovak Republic |
| Hiyamizu et al. (2012)     | Cognitively healthy | 36  | 72   | 72 | Nr                           | Cognitive tasks (calculation task, visual search task, verbal fluency task)                                              | Strength and balance       | Simultaneous | Supervised | 12 | 2                   | 60                      | 24 | PE: Strength and balance                                                           | Japan           |
| Htut et al. (2018)         | Cognitively healthy | 84  | 75.8 | 44 | 25.2                         | X-box 360 games                                                                                                          | X-box 360 games            | Exergaming   | Supervised | 8  | 3                   | 30                      | 12 | PE: Strength and balance training<br>Sham: Board and card games<br>Passive control | Thailand        |
| Hughes et al. (2014)       | MCI                 | 20  | 77.4 | 70 | 27.2                         | Nintendo Wii games                                                                                                       | Nintendo Wii games         | Exergaming   | Supervised | 24 | 1                   | 90                      | 36 | Sham: Health education                                                             | USA             |
| Karssemeijer et al. (2019) | Dementia            | 101 | 79.2 | 46 | 22.9                         | Bicycle exergame with cognitive tasks targeting inhibition, switching and processing speed                               | Cycling                    | Exergaming   | Supervised | 12 | 3                   | 30-50                   | 24 | PE: Cycling<br>Sham: Relaxation and flexibility                                    | Netherlands     |
| Kitazawa et al. (2015)     | Cognitively healthy | 60  | 76.4 | 55 | Nr                           | Dual-task net-step exercise (learning step sequences)                                                                    | Net-step exercise          | Simultaneous | Supervised | 8  | 1                   | 60                      | 8  | Passive control                                                                    | Japan           |
| Laatar et al. (2018)       | Cognitively healthy | 24  | 66.9 | Nr | Nr                           | Cognitive tasks (objects manipulation, calculations, visual searching, naming, memory, visual imaginary) during exercise | Balance-strength exercises | Simultaneous | Supervised | 24 | 3                   | 60                      | 72 | PE: Balance-strength exercises                                                     | Tunisia         |
| Legault et al. (2011)      | Cognitively healthy | 67  | 76.4 | 51 | 28.41<br>(3MSE) <sup>a</sup> | Single domain CCT (memory)                                                                                               | Aerobic and flexibility    | Sequential   | Supervised | 16 | 2                   | 105<br>(CT: 45, PE: 60) | 56 | CT: Single domain CCT<br>PE: Aerobic and flexibility<br>Sham: Health education     | USA             |
| Leon et al. (2015)         | Cognitively healthy | 138 | 71.3 | 77 | Nr                           | Cognitive tasks                                                                                                          | Strength, resistance and   | Simultaneous | Supervised | 12 | 2                   | 60                      | 24 | PE: strength, resistance and                                                       | Spain           |

|                             |                     |     |      |    |       |                                                                                  |                                                                         |              |            |                       |                           |                             |      |                                                                                              |         |
|-----------------------------|---------------------|-----|------|----|-------|----------------------------------------------------------------------------------|-------------------------------------------------------------------------|--------------|------------|-----------------------|---------------------------|-----------------------------|------|----------------------------------------------------------------------------------------------|---------|
|                             |                     |     |      |    |       | (stimulus processing, decision-making, and movement programming) during exercise | aerobic                                                                 |              |            |                       |                           |                             |      | aerobic<br>Passive control                                                                   |         |
| Linde and Alfermann (2014)  | Cognitively healthy | 55  | 67.1 | 59 | Nr    | Multidomain CT                                                                   | Aerobic and strength                                                    | Sequential   | Supervised | 16                    | 2<br>(Combined: 1, PE: 1) | 60 - 90<br>(CT: 30, PE: 60) | 40   | CT: Multidomain CT<br>PE: Aerobic and strength<br>Passive control                            | Germany |
| Maffei et al. (2017)        | MCI                 | 113 | 74.5 | 49 | 25.6  | Multidomain CT (paper and pencil and computerized tasks)                         | Aerobic, strength and flexibility                                       | Sequential   | Supervised | 28                    | 6<br>(CT: 3, PE: 3)       | CT: 120<br>PE: 60           | 252  | Passive control                                                                              | Italy   |
| Maillot et al. (2012)       | Cognitively healthy | 32  | 73.5 | 84 | 28.97 | Nintendo Wii games                                                               | Nintendo Wii games                                                      | Exergaming   | Supervised | 12                    | 2                         | 60                          | 24   | Passive control                                                                              | France  |
| McDaniel et al. (2014)      | Cognitively healthy | 79  | 65   | 64 | 29    | Multidomain CT                                                                   | Aerobic exercise                                                        | Sequential   | Supervised | 24<br>(PE: 24, CT: 8) | 6<br>(CT: 3, PE: 3)       | 60                          | 96   | CT: Multidomain CT<br>PE: Aerobic exercise<br>Sham: Low-intensity exercise, health education | USA     |
| Mrakic-Sposta et al. (2018) | MCI                 | 10  | 73.3 | 60 | 23    | Virtual reality training including cycling, crossing roads and shopping          | Virtual reality training including cycling, crossing roads and shopping | Simultaneous | Supervised | 6                     | 3                         | 45                          | 13.5 | Passive control                                                                              | Italy   |
| Nishiguchi et al. (2015)    | Cognitively healthy | 48  | 73.2 | 46 | 27.6  | Cognitive tasks (verbal fluency, cognitive-motor tasks) during exercise          | Strength and stepping exercise                                          | Simultaneous | Supervised | 12                    | 1                         | 90                          | 18   | Passive control                                                                              | Japan   |
| Norouzi et al. (2019)       | Cognitively healthy | 60  | 68.3 | 0  | 26.3  | Cognitive tasks (matching, arithmetic, counting, remembering) during exercise    | Resistance                                                              | Simultaneous | Supervised | 4                     | 3                         | 60-80                       | 14   | PE: Motor-motor dual task training<br>Sham: Group discussions                                | Iran    |
| Park et al. (2019)          | MCI                 | 49  | 71.6 | 69 | 24.5  | Cognitive tasks (word games, numerical                                           | Aerobic and balance                                                     | Simultaneous | Supervised | 24                    | 1                         | 110                         | 44   | Passive control                                                                              | Korea   |

|                              |                                               |     |      |     |                            |                                                                                                    |                                                                                            |              |              |                  |   |                     |    |                                |             |
|------------------------------|-----------------------------------------------|-----|------|-----|----------------------------|----------------------------------------------------------------------------------------------------|--------------------------------------------------------------------------------------------|--------------|--------------|------------------|---|---------------------|----|--------------------------------|-------------|
|                              |                                               |     |      |     |                            | calculations, memory span) during exercise                                                         |                                                                                            |              |              |                  |   |                     |    |                                |             |
| Pompeu et al. (2012)         | Parkinson's disease                           | 32  | 67.4 | 33  | 26.80 (MoCA)               | Nintendo Wii games                                                                                 | Nintendo Wii games and global exercises                                                    | Exergaming   | Supervised   | 7                | 2 | 60                  | 14 | PE: Balance training           | Brazil      |
| Rahe et al. (2015)           | Cognitively healthy                           | 68  | 68.4 | 68  | Nr                         | Group 1: Multidomain CT<br>Group 2: Multidomain CT + counseling                                    | Multicomponent physical activity (strength, flexibility, coordination, endurance, aerobic) | Sequential   | Supervised   | 7                | 2 | 90 (PE: 20; CT: 70) | 21 | CT: Multidomain CT             | Germany     |
| Reigal and Mendo (2014)      | Cognitively healthy                           | 57  | 66.1 | 100 | Nr                         | Cognitive tasks (focusing on executive function, attention, cognitive-motor tasks) during exercise | Aerobic exercise                                                                           | Simultaneous | Supervised   | 20               | 2 | 75                  | 50 | PE: Aerobic exercise           | Spain       |
| Rezola-Pardo et al. (2019)   | Long-term nursing home residents <sup>b</sup> | 68  | 85.1 | 67  | 12.8 (MoCA)                | Cognitive tasks (attention, executive function, semantic memory) during exercise                   | Strength and balance                                                                       | Simultaneous | Supervised   | 12               | 2 | 60                  | 24 | PE: Strength and balance       | Spain       |
| Romera-Liebana et al. (2018) | Cognitively healthy (frail)                   | 352 | 77.3 | 75  | 26.5 (MEC-35) <sup>a</sup> | Multidomain CT                                                                                     | Multicomponent physical activity (aerobic, strength and balance)                           | Sequential   | Supervised   | 12 (PE: 6 CT: 6) | 2 | PE: 60 CT: 90       | 30 | Passive control                | Spain       |
| Schattin et al. (2016)       | Cognitively healthy                           | 27  | 80   | 44  | 28.7                       | Videogame dancing                                                                                  | Videogame dancing                                                                          | Exergaming   | Supervised   | 8                | 3 | 30                  | 12 | PE: Balance training           | Switzerland |
| Schoene et al. (2013)        | Cognitively healthy                           | 32  | 77.9 | Nr  | 28.85                      | Exergame step pad training                                                                         | Exergame step pad training                                                                 | Exergaming   | Unsupervised | 8                | 3 | 15-20               | 8  | Passive control                | Australia   |
| Schoene et al. (2015)        | Cognitively healthy                           | 81  | 81.5 | 67  | Nr                         | Exergame step pad training                                                                         | Exergame step pad training                                                                 | Exergaming   | Unsupervised | 16               | 3 | 20                  | 16 | Passive control: Health advice | Australia   |

|                                  |                                                          |     |      |    |       |                                |                                                                        |              |              |    |                     |                        |    |                                                                   |             |
|----------------------------------|----------------------------------------------------------|-----|------|----|-------|--------------------------------|------------------------------------------------------------------------|--------------|--------------|----|---------------------|------------------------|----|-------------------------------------------------------------------|-------------|
| Shatil (2013)                    | Cognitively healthy                                      | 122 | 79.8 | 69 | >24   | Multidomain CCT                | Aerobic and strength                                                   | Sequential   | Supervised   | 16 | 6<br>(CT: 3, PE: 3) | CT: 40<br>PE: 45       | 68 | CT: Multidomain CT<br>PE: Aerobic and strength<br>Sham: Book club | USA         |
| Shimada et al. (2018)            | MCI                                                      | 308 | 71.6 | 50 | 26.7  | Dual-task "cognicize" training | Aerobic, strength and balance                                          | Simultaneous | Supervised   | 40 | 1                   | 90                     | 60 | Sham: Health education                                            | Japan       |
| Song et al. (2018)               | Parkinson's disease                                      | 53  | 66.6 | 60 | 28.48 | Exergame step pad training     | Exergame step pad training                                             | Exergaming   | Unsupervised | 12 | 3                   | 15                     | 9  | Passive control                                                   | Australia   |
| Stanmore et al. (2019)           | People living in assisted living facilities <sup>c</sup> | 92  | 77.8 | 78 | Nr    | Exergames                      | Exergames implementing strength, balance, coordination and flexibility | Exergaming   | Supervised   | 12 | 3                   | 10                     | 6  | Passive control                                                   | UK          |
| Ten Brinke et al. (2019)         | Cognitively healthy                                      | 117 | 72.2 | 60 | 28.6  | Multidomain CCT                | Brisk walk                                                             | Sequential   | Supervised   | 8  | 6                   | 60<br>(PE: 15, CT: 45) | 48 | CT: Multidomain CCT<br>Sham: Sham CT + sham PE + health education | Canada      |
| van het Reve and de Bruin (2014) | Cognitively healthy                                      | 151 | 81.5 | 70 | 27.65 | Single domain CCT (attention)  | Strength and balance                                                   | Sequential   | Supervised   | 12 | 5<br>(CT: 3, PE: 2) | CT: 10<br>PE: 40       | 22 | PE: Strength and balance                                          | Switzerland |

<sup>a</sup> Converted to a 0-30 scale

<sup>b</sup> Classified as dementia

<sup>c</sup> Classified as mild cognitive impairment

*Note.* CCT = computerized cognitive training. CT = cognitive training. MCI = mild cognitive impairment. MEC-35 = Mini-Examination Cognitive of Lobo.

MMSE = Mini-Mental State Examination. MoCA = Montreal Cognitive Assessment. PE = physical exercise. 3MSE = Modified Mini-Mental State Examination



## **Appendix**

**Appendix A.** Search strategy

**Appendix B.** Classification of cognitive and physical outcomes

**Appendix C.** List of excluded studies

**Appendix D.** Risk of bias within individual studies

**Appendix E.** Funnel plots for cognitive, physical and psychosocial outcomes

**Appendix F.** Results of individual studies and comparisons: Overall cognition

**Appendix G.** Results of individual studies and comparisons: Physical outcomes

**Appendix H.** Results of individual studies and comparisons: Psychosocial outcomes

**Appendix I.** Results of individual studies and comparisons: Dementia and Parkinson's disease

**Appendix J.** Distribution of potential effect modifiers

**Appendix K.** CINEMA grading of the certainty of the evidence

**Appendix L.** Sensitivity analyses

## Appendix A. Search strategy (Ovid)

1. (cognitive training or brain training or attention training or reasoning training or memory training or mental training or mental skills training or neurocognitive training).mp
2. (cognitive exercise or brain exercise or memory exercise or attention exercise or reasoning exercise).mp
3. (cognitive stimulation or memory stimulation or memory enhanc\$ or cognitive enhanc\$).mp
4. (cognitive rehabilitat\$ or cognitive remediation or cognitive restructur\$).mp
5. (cognitive activit\$ or mental activit\$).mp
6. (speed and processing and training).mp
7. (mnemonic\$ or method of loci).mp
8. (video game\$ or videogame\$ or wii or computer game\$ or virtual reality).mp
9. (cognitive intervention\$ or neurocognitive intervention\$ or neuropsychological intervention\$).mp
10. exercis\$.mp
11. sport\$.mp
12. exp Exercise/
13. exp Physical fitness/
14. (aerobic exercis\$ or aerobic train\$ or aerobic fitness or aerobic program\$).mp
15. (resistance exercis\$ or resistance train\$ or anaerobic exercis\$ or anaerobic train\$ or resistance program\$).mp
16. (physical or aerobic or endurance or cardiorespiratory or cardiovascular or resistance or strength).mp
17. (bicycl\$ or bike rid\$ or bicycle rid\$).mp
18. (multimodal or multidomain or multicomponent or multi-modal or multi-domain or multi-component or dual task or dual-task or tai chi or taiji or tai chi chuan or danc\$).mp
19. (exergam\$ or active video game\$ or active videogame\$ or kinect or active play or interactive video).mp
20. (cognitive adj2 physical).mp
21. (cognition or cognitive or memory or executive function\$ or executive control or attention or visuospatial or processing speed or language).mp
22. (older adults or elder\$ or senior\$ or adult\$ or older or ag?ing).mp
23. (mild cognitive impairment or mildly cognitively impaired or Parkins\$ or dement\$ or alzheimer\$).mp
24. 1 or 2 or 3 or 4 or 5 or 6 or 7 or 8 or 9
25. 10 or 11 or 12 or 13 or 14 or 15 or 16 or 17
26. 22 or 23
27. 24 and 25
28. 18 or 19 or 20
29. (27 or 28) and 21 and 26

## Appendix B. Classification of cognitive and physical outcomes

---

### COGNITIVE OUTCOMES

---

#### **Executive Functions**

1-Back  
2-Back  
Attention Network Test, conflict  
Attentional Network Test executive  
Avoiding Distracters  
Baddeley DT-Dual task index  
Brief Test of Attention  
Color trails  
Dimensional Change Card Sort  
Divided Attention  
EFT congruent RT  
EFT incongruent RT  
Flanker task  
Go/No-go  
Inhibition  
Set-shifting  
Shifting  
Stroop Color-Words  
Task switching test  
TMT B

#### **Short-Term and Working Memory**

Auditory Working Memory  
Babcock short story immediate  
Benton Visual Retention Test  
Corsi test forward  
Digit Span backwards  
Digit span forwards  
Executive control  
Global Visual Memory  
List sorting working memory test  
Logical Memory I - WMS  
Mental control (WMS)  
Paired-Associates  
RCFT immediate recall  
Self-ordered pointing task  
Spatial span  
Visual reproductions (WMS)

#### **Global Cognition**

ADAS-Cog  
Addenbrooke's Cognitive Examination  
CAMCI total  
DemTect Cognitive status  
MMSE  
MoCA  
TDAS total score

#### **Processing Speed**

Age concentration test A  
Age concentration test B  
Attention Network Test, alert (ms)  
Attention Network Test, orient (ms)  
Attention Network Test, reaction time (ms)  
Attentional Matrices  
Baddeley DT (Xs)  
Cancellation  
d2 Test of attention  
Decision time: simple and choice RT  
Digit symbol coding  
Digit-symbol substitution test  
Divided attention MA upper channel  
Divided attention RT lower channel  
DRT(A) number of correct reactions  
DRT(N) number of incorrect reactions  
Hand RT  
Movement time: simple and choice RT  
Number comparison  
Pattern comparison processing speed test  
Sensor-based Hand Reaction Time  
Simple RT  
Speed of visual-spatial IP  
Stroop Colors  
Stroop Words  
Symbol Digits Modalities Test  
Symbol search  
Symbol-Digit Substitution Test  
Tapping Test  
TMT A  
UFOV divided attention  
UFOV processing speed  
UFOV selective attention

#### **Visual Processing**

Copy of drawings with programming elements  
Copy of freehand drawings  
Direction headings  
Mental rotation  
RCFT copy  
Spatial relations (LPS 50+)  
Visual Scanning

#### **Fluid Reasoning**

Cooking Breakfast Task  
Letter Sets  
Matrix Reasoning Test  
Raven Coloured Progressive Matrices  
Reasoning (LPS 50+)  
Rule Shift cards test  
WAIS-III Matrices

---



---

**Long-Term Storage and Retrieval**

Babcock short story delayed  
COWAT  
DemTect Verbal memory delayed  
DemTect Verbal memory immediate  
Designation of famous people's names  
Evocation of words  
Hopkins Verbal Learning Task - delayed recall  
Hopkins Verbal Learning Task - immediate recall  
List learning memory sum from ADAS-Cog  
Location learning test displacement score delayed recall  
Logical Memory II - WMS  
Medium-term verbal memory  
Memory for Health Information  
Naming  
Oral reading recognition test  
Picture sequence memory test  
Picture vocabulary test  
RAVLT - delayed recall  
RAVLT - immediate recall  
RAVLT recognition  
Story recall  
Verbal designation of images  
Verbal fluency - category  
Verbal fluency - letter  
Virtual week

WAIS-III Similarities  
Verbal abstraction of word pairs

---

**PHYSICAL OUTCOMES**

**Aerobic capacity**

6 min walk test  
6 min step test  
Max O2 pulse  
Senior fitness test 2 min stepping test  
VO2 max

**Balance**

Berg balance scale  
BESTest Total score  
Coordinated stability  
SPPB extended balance test  
Maximum balance range, anterior-posterior  
Mini-BESTest  
Tandem stance  
SPPB adapted balance test  
Sway  
Tinetti balance  
Unipedal Stance Test

**Cognitive-motor**

10 m walking time, dual-tasking (s)  
Cadence Dual-task  
Choice stepping movement time  
Choice stepping reaction time  
Dual task walking  
Dual task Cycle time variability  
Dual task Gait speed  
Dual task Step length  
Gait speed Dual task  
iTUG dual task  
Sensor-based Stepping Reaction Time  
Simple Reaction Time Foot  
Stride Length Dual task walking  
Sway Length of Center of gravity, Stroop task  
Unipedal Stance Test with eyes open, dual task condition  
Walk speed (m/s), 0-back  
Walk speed (m/s), 1-back

**Strength**

Arm curls  
Chest press  
Handgrip strength  
Hip abduction  
Knee extension  
Leg press  
Seated row

---

---

**Gait**

Cadence  
Cycle duration, walking  
Cycle time variability  
Functional gait assessment (FGA)  
Gait adaptability test (GAT) accuracy (cm)  
Gait adaptability test (GAT) velocity (cm/s)  
Gait speed  
Step length  
Step length variability  
Tinetti gait  
Walking speed (m/s)

**Functional mobility**

10 m walking time  
4-meter walk  
5 Chair rises  
5TSTS (times)  
8-Foot up and go  
Back scratch  
Chair sit and reach  
Chair stand  
Functional reach  
Functional Stretching  
iTUG  
Get up and go test  
Senior fitness test 30s chair rises  
Sensor-based chair stand test  
Short physical performance battery  
Sit & reach  
Sit to standing time  
Timed up and go

---

**PSYCHOSOCIAL OUTCOMES**

---

Geriatric Depression Scale  
Short Form-12  
European Quality of Life 5 Dimensions  
9-item Patient Health Questionnaire  
The quality of life test  
Medical Outcome Study Short Form-8  
Anxiety and Depression Goldberg Scale  
de Jong Gierveld Loneliness Scale  
Quality of Life Alzheimer's Disease scale  
VAS Fatigue

---

**FUNCTIONAL OUTCOMES**

---

Bristol Activities of Daily Living Scale  
Functional Activities Questionnaire  
Bayer Activities of Daily Living

---

**Appendix C.** List of excluded studies. (Note: a study could be ineligible for multiple reasons but appear only once in this table.)

| Authors                                                                                                                                                                     | Year | Title                                                                                                                                                                                                                                | Exclusion reason    |
|-----------------------------------------------------------------------------------------------------------------------------------------------------------------------------|------|--------------------------------------------------------------------------------------------------------------------------------------------------------------------------------------------------------------------------------------|---------------------|
| Tang, H.                                                                                                                                                                    | 2012 | Non-drug therapies against dementia: Physical exercises or mental training or both?                                                                                                                                                  | Conference abstract |
| Thom, J.; Cooney, J.; Nelis, S.; Hindle, J.; Nixon, J.; Jones, I.; Whitaker, C.; Clare, L.                                                                                  | 2014 | Behaviour change to promote healthy ageing in over 1950s: Physical activity, function and health results from the Agewell trial                                                                                                      | Conference abstract |
| Solomon, A.; Ngandu, T.; Ahtiluoto, S.; Jula, A.; Laatikainen, T.; Rauramaa, R.; Strandberg, T.; Tuomilehto, J.; Soininen, H.; Kivipelto, M.                                | 2012 | Results and experiences from scandinavian multi-domain intervention trials (drs extra and finger)                                                                                                                                    | Conference abstract |
| Solomon, A.; Levalhti, E.; Antikainen, R.; Laatikainen, T.; Soininen, H.; Strandberg, T.; Tuomilehto, J.; Kivipelto, M.; Ngandu, T.                                         | 2018 | Effects of a Multidomain Lifestyle Intervention on Overall Risk for Dementia: The Finger Randomized Controlled Trial                                                                                                                 | Conference abstract |
| Thunborg, C.; Sindi, S.; Faxen, G.; Storskog, T.; Soininen, H.; Hartmann, T.; Andrieu, S.; Solomon, A.; Kivipelto, M.                                                       | 2017 | Multimodal lifestyle and nutritional intervention in prodromal Alzheimer's disease: Mind-Admini pilot trial                                                                                                                          | Conference abstract |
| Tsapanou, A.; Margiotti, L.; Beratis, I.; Papatriantafyllou, J.; Kamsadeli, V.; Nika, A.; Tsilikopoulou, G.; Kalfakis, N.; Sakka, P.; Bamidis, P.; Papageorgiou, S. G.      | 2011 | Cognitive and physical training for the prevention of cognitive decline in the elderly: Preliminary data of the Long Lasting Memories European project                                                                               | Conference abstract |
| Preminger, S.; Sarfaty, S.; Lemor, B.; Blumenfeld, B.; Maoz, S.                                                                                                             | 2016 | Cognitive benefits of combining cognitive training with physical activity in computerized training of executive functions                                                                                                            | Conference abstract |
| Eichberg, S.                                                                                                                                                                | 2013 | Different Effects of Different Physical Training Programs on Cognitive Function in Older Men                                                                                                                                         | Conference abstract |
| Gregory, M. A.; Gill, D. P.; De Cruz, A.; Petrella, R. J.                                                                                                                   | 2016 | Dual-task gait training and aerobic exercise training improves cognition in older adults with early indications of cognitive impairment                                                                                              | Conference abstract |
| Kanemaru, A.; Kato, T.; Sugawara, Y.; Kawaji, Y.; Honda, T.; Itakura, A.; Hiraoka, T.; Makita, A.; Nakajima, R.; Yamazaki, R.; Ota, T.; Kanemaru, K.                        | 2018 | The Short-Term Effect of the Rehabilitation Program of Physical and Cognitive Rec-Exercise (Reprecc) for the Elderly with Mild Cognitive Impairment                                                                                  | Conference abstract |
| Karssemeijer, E. G. A.; Aaronson, J. A.; Olde Rikkert, M. G. M.; Kessels, R. P. C.                                                                                          | 2018 | A Randomized Controlled Trial on the Effect of Exergaming and Single Aerobic Training on Cognitive Functioning in Older Adults with Dementia                                                                                         | Conference abstract |
| Karssemeijer, E. G. A.; Olde Rikkert, M. G. M.                                                                                                                              | 2017 | A randomized controlled trial on the effect of physical and combined physical and cognitive dual-task training on frailty in early stage dementia patients                                                                           | Conference abstract |
| Santos, G.; Ortega, L.; Yassuda, M.; Forlenza, O.; Nunes, P.                                                                                                                | 2011 | The effects of a multiprofessional cognitive and functional rehabilitation program for patients with Alzheimer's disease and mild cognitive impairment                                                                               | Conference abstract |
| Rosenberg, A.; Solomon, A.; Ngandu, T.; Levalhti, E.; Laatikainen, T.; Paajanen, T.; Hanninen, T.; Antikainen, R.; Strandberg, T.; Soininen, H.; Kivipelto, M.              | 2017 | Multidomain lifestyle intervention benefits a large elderly population at risk for cognitive decline: Subgroup analyses of the Finnish geriatric intervention study to prevent cognitive impairment and disability (FINGER)          | Conference abstract |
| Rosenberg, A.; Solomon, A.; Turunen, H.; Ngandu, T.; Levalhti, E.; Laatikainen, T.; Paajanen, T.; Hanninen, T.; Antikainen, R.; Strandberg, T.; Soininen, H.; Kivipelto, M. | 2016 | Influence of apoe, age, sex, education and baseline cognition on intervention effects on cognition in the finnish geriatric intervention study to prevent cognitive impairment and disability (FINGER)                               | Conference abstract |
| Kato, T.; Kanemaru, A.; Sugawara, Y.; Kawaji, Y.; Hiraoka, T.; Honda, T.; Nakajima, R.; Makita, A.; Itakura, A.; Yamazaki, R.; Ohta, T.                                     | 2017 | A combination intervention (cognitive training and physical exercise) could improve or maintain cognitive functioning in MCI subjects                                                                                                | Conference abstract |
| Gary, R.; Waldrop-Valverde, D.; Paul, S.                                                                                                                                    | 2017 | Exercise and cognitive re-training as a strategy to improve cognitive outcomes in heart failure                                                                                                                                      | Conference abstract |
| Franco-Martin, M.; Gonzalez Palau, F.; Ruiz, Y.; Vargas, E.; Solis, A.; G. Mellado J; Toribio, J. M.; Losada, R.; Gomez, P.; Bueno, Y.; Bartolome, L.                       | 2011 | Usability of a cognitive (Gradior) and physical training program based in new software technologies in patients with mild dementia, mild cognitive impairment and healthy elderly people: Long Lasting Memories preliminary findings | Conference abstract |
| Cleverley, M.; Walker, Z.; Dannhauser, T.                                                                                                                                   | 2012 | Engaging patients at high risk of dementia in multimodal cognitive health promoting activities: The thinkingfit study                                                                                                                | Conference abstract |
| Kivipelto, M.                                                                                                                                                               | 2016 | Lifestyle intervention to prevent cognitive impairment                                                                                                                                                                               | Conference abstract |

|                                                                                                                                                                                                                                     |      |                                                                                                                                                                                       |                     |
|-------------------------------------------------------------------------------------------------------------------------------------------------------------------------------------------------------------------------------------|------|---------------------------------------------------------------------------------------------------------------------------------------------------------------------------------------|---------------------|
| Kivipelto, M.; Ngandu, T.; Lehtisalo, J.; Hanninen, T.; Jula, A.; Laatikainen, T.; Lindstrom, J.; Paajanen, T.; Pajala, S.; Peltonen, M.; Stigsdotter-Neely, A.; Levalahti, E.; Strandberg, T. E.; Tuomilehto, J.; Soininen, H.     | 2014 | A multidomain two-year randomized controlled trial to prevent cognitive impairment - The FINGER study                                                                                 | Conference abstract |
| Kuh, D.                                                                                                                                                                                                                             | 2012 | A life course approach to physical capability: Findings from the HALCYon research programme                                                                                           | Conference abstract |
| Lam, L.; Fung, A.                                                                                                                                                                                                                   | 2012 | Interim findings of a randomized controlled trial of leisure activity intervention on preservation of cognitive function in Chinese older adults with mild cognitive impairment       | Conference abstract |
| Kanemaru, A.; Kato, T.; Sugawara, Y.; Kawaji, Y.; Hiraoka, T.; Honda, T.; Nakajima, R.; Makita, A.; Itakura, A.; Yamazaki, R.; Ota, T.; Kanemaru, K.                                                                                | 2017 | An intervention study of a rehabilitation program using physical and cognitive reexercise for mild cognitive impairment                                                               | Conference abstract |
| Kanemaru, A.; Kato, T.; Sugawara, Y.; Kawaji, Y.; Hiraoka, T.; Honda, T.; Nagajima, R.; Makita, A.; Itakura, A.; Yamazaki, R.; Ota, T.                                                                                              | 2017 | The effects of the intervention using physical exercise and cognitive training on the mental status of the elderly with mild cognitive impairment or mild dementia                    | Conference abstract |
| Han, M. I.; Shin, M. O.; Lee, K. H.                                                                                                                                                                                                 | 2018 | Effects of a Manualized, Group-Based Cognitive Training on Cognitive Performance in Community-Dwelling Elderly                                                                        | Conference abstract |
| Gregory, M. A.; Gill, D. P.; Morton, H.; De Cruz, A.; Gonzalez, L.; Petrella, R.                                                                                                                                                    | 2014 | The effects of mind-motor and aerobic exercise on cognition and mobility in older adults with cognitive impairment but not dementia                                                   | Conference abstract |
| McCulloch, K.; Giuliani, C.; Shubert, T.; Hartman, M.                                                                                                                                                                               | 2010 | Community-based group exercise program with dualtask training components improves balance during dual-task conditions in ambulatory older adults                                      | Conference abstract |
| Middleton, L. E.; Poelke, G.; Santos, W. M.; Yaffe, K.; Barnes, D. E.; Goodson, W.                                                                                                                                                  | 2012 | Impact of a 12-week exercise intervention on non-cognitive outcomes in sedentary elders with cognitive complaints or mild cognitive impairment: Findings from the max trial           | Conference abstract |
| Middleton, L.; Santos, W. M.; Poelke, G.; Yaffe, K.; Barnes, D.                                                                                                                                                                     | 2012 | Aerobic exercise versus stretching and toning: Changes in physical function and mediation of cognitive effects in the max trial                                                       | Conference abstract |
| Ngandu, T.; Lehtisalo, J.; Solomon, A.; Coley, N.; Antikainen, R.; Hanninen, T.; Lindstrom, J.; Laatikainen, T.; Paajanen, T.; Pajala, S.; Peltonen, M.; Strandberg, T.; Tuomilehto, J.; Soininen, H.; Kivipelto, M.                | 2017 | The impact of adherence to multidomain lifestyle intervention on cognition: the finnish geriatric intervention study to prevent cognitive impairment and disability (FINGER)          | Conference abstract |
| Ortega, L.; Yassuda, M.; Nunes, P.; Arahamian, I.; Santos, F.; Santos, G.; Brum, P.; Borges, S.; Oliveira, A.; Chaves, G.; Ciasca, E.; Ferreira, R.; De Paula, V.; Takeda, O.; Mirandez, R.; Falcao, D.; Cachioni, M.; Forlenza, O. | 2011 | The effects of a multiprofessional cognitive and functional rehabilitation program for patients with mild Alzheimer's disease                                                         | Conference abstract |
| Parfitt, G.; Corlis, M.; Penington, A.; Post, D.                                                                                                                                                                                    | 2017 | Evaluation of an implementation project: Improving cognitive and functional capacity of older people with dementia in residential aged care through an exercise prescription approach | Conference abstract |
| Park, K. W.; Park, J. H.; Park, H.; Choi, S. H.; Jeong, M. K.                                                                                                                                                                       | 2016 | Effects of multi-task exercise program on cognitive and physical function in patients with mild cognitive impairment: A randomized controlled trial                                   | Conference abstract |
| Scioli-Salter, E. R.; White, K. B.; Ashare, A.; Andrade, G.; Iannuccilli, M.; Soscia, J.; White, W. T.                                                                                                                              | 2017 | The effect of endurance exercise and activation coaching on cognition and mood in a population of older adults at risk for dementia                                                   | Conference abstract |
| Gregory, M. A.; Gill, D. P.; De Cruz, A.; Shigematsu, R.; Petrella, R. J.                                                                                                                                                           | 2015 | A multiple-modality exercise program plus dual-task training improved mobility but did not impact vascular health in active older adults without dementia                             | Conference abstract |
| Gill, D. P.; Gregory, M. A.; Liu-Ambrose, T.; Hachinski, V.; Zou, G. Y.; Fitzgerald, C.; Shigematsu, R.; De Cruz, A.; Petrella, R. J.                                                                                               | 2014 | A randomized controlled trial to examine combined multiple-modality and mind-motor exercise on cognitive functioning in community-dwelling older adults: A pilot study                | Conference abstract |
| Gill, D.; Koblinsky, N.; Gregory, M.; Morton, H.; Fitzgerald, C.; Petrella, R.                                                                                                                                                      | 2013 | Preliminary findings from a 6-month randomized controlled trial of combined dual-task gait training and aerobic exercise in older adults with cognitive impairment but no dementia    | Conference abstract |
| Weicker, J.; Hudl, N.; Marichal, E.; Muller, K.; Lepsien, J.; Trapp, S.; Frisch, S.; Thone-Otto, A.                                                                                                                                 | 2013 | Training of workingmemory in healthy elderly subjects-a randomized controlled trial                                                                                                   | Conference abstract |
| Young, J.; Watt, P.; Tabet, N.; Rusted, J.                                                                                                                                                                                          | 2013 | Are there cognitive benefits fromlongterm high-intensity exercise in older adults?                                                                                                    | Conference abstract |
| Youn Youn Hong, S.; Park, Y.                                                                                                                                                                                                        | 2018 | Effects of a Senior Center Based Multi-Intervention on Physical and Cognitive Function in Elders with Mci                                                                             | Conference abstract |

|                                                                                                                                                                                                                                                                                                                                                                               |      |                                                                                                                                                                                                                           |                     |
|-------------------------------------------------------------------------------------------------------------------------------------------------------------------------------------------------------------------------------------------------------------------------------------------------------------------------------------------------------------------------------|------|---------------------------------------------------------------------------------------------------------------------------------------------------------------------------------------------------------------------------|---------------------|
| Wu, C. Y.; Yeh, T. T.; Hu, Y. T.; Chang, K. C.                                                                                                                                                                                                                                                                                                                                | 2018 | The beneficial effects of sequential combination of cognitive training and aerobic exercise in stroke patients with cognitive decline                                                                                     | Conference abstract |
| Wall, K. M.; Stark, J.; Karla-Lall, A.; Schillaci, A.; Christian, H.; Doty, C.; McLaren, E.; Saulnier, T.; Cohen, B. D.; Anderson-Hanley, C.                                                                                                                                                                                                                                  | 2018 | Biomarkers and components of the interactive physical and cognitive exercise system (iPACESTM v2.0) for mild cognitive impairment (MCI): Cortisol, dehydroepiandrosterone (Dhea-S), and insulin-like growth factor (IGF1) | Conference abstract |
| Viscogliosi, C.; Desrosiers, J.; Gauthier, P.; Beauchemin, R.                                                                                                                                                                                                                                                                                                                 | 2000 | Impact of a multi-strategic group program on the level of daily life functioning of elderly persons with mild cognitive deficits living at home. [French]                                                                 | Conference abstract |
| Vellas, B.; Carrie, I.; Guyonnet, S.; Touchon, J.; Dantoine, T.; Dartigues, J. F.; Cufi, M. N.; Bordes, S.; Gasnier, Y.; Robert, P.; Bories, L.; Rouaud, O.; Desclaux, F.; Sudres, K.; Bonnefoy, M.; Pesce, A.; Fougere, B.; Delrieu, J.; Faisant, C.; Lala, F.; Dupuy, C.; Cantet, C.; Coley, N.; Belleville, S.; Willis, S. L.; Weiner, M. W.; Jean Ousset, P.; Andrieu, S. | 2015 | MAPT (multi-domain Alzheimer's prevention trial): Results at 36 months                                                                                                                                                    | Conference abstract |
| Doniger, G. M.; Plotnik, M.; Bahar-Fuchs, A.; Gottlieb, A.; Tkachov, A.; Bahat, Y.; Sharon, H.; Ben-Gal, O.; Zeilig, G.; Beeri, M. S.                                                                                                                                                                                                                                         | 2017 | Virtual reality-based cognitivemotor training for middle-aged adults at high ad risk: Study design and baseline characteristics from a randomized controlled trial                                                        | Conference abstract |
| Fotuhi, M.; Pradhan, D.; Trullinger, M.; Riloff, T.                                                                                                                                                                                                                                                                                                                           | 2015 | High impact of a brain fitness program in improving cognitive function and brain activity in elderly with mild cognitive impairment                                                                                       | Conference abstract |
| Edwards, J. D.; Xu, H.; Clark, D.; Ross, L. A.; Unverzagt, F. W.                                                                                                                                                                                                                                                                                                              | 2016 | The active study: What we have learned and what is next? cognitive training reduces incident dementia across ten years                                                                                                    | Conference abstract |
| Dominguez, J. C.; Del Moral, C.; De Guzman, M. F. P.; Dominguez, J. V. D.; Dominguez-Awao, J. K.; Domingo, J.; Natividad, B. P.; Decena, J.; Citron, R. L. B.; Villaruel, S. G.; Yabut, M. J.; Reandelar, M.                                                                                                                                                                  | 2017 | A community-based ballroom dance intervention "indak" improved cognition among elderly with mild cognitive impairment                                                                                                     | Conference abstract |
| Daffner, K. R.; Feng, N. C.; Ryan, E.; Kidane, M.; Tusch, E. S.; Carlsson, R.; Mohammed, A. H.; Hakansson, K.                                                                                                                                                                                                                                                                 | 2017 | The feasibility of a home-based, subject-controlled, interactive physical exercise program to promote cognitive health in older adults                                                                                    | Conference abstract |
| Coley, N.; Ngandu, T.; Cantet, C.; Lehtisalo, J.; Vellas, B.; Kivipelto, M.; Andrieu, S.                                                                                                                                                                                                                                                                                      | 2017 | Adherence to multidomain interventions for the prevention of Alzheimer's disease: Data from the MAPT and finger trials                                                                                                    | Conference abstract |
| Bondoc, S.; Hewitt, P.; Frey, N.; McQuide, B.; Johnson, A.                                                                                                                                                                                                                                                                                                                    | 2011 | The effect of wii-based interventions on physical, cognitive and social functioning among pre-frail elderly persons                                                                                                       | Conference abstract |
| Bherer, L.                                                                                                                                                                                                                                                                                                                                                                    | 2012 | Enhancing cognitive performances in older adults at risk of cognitive decline: The benefits of exercise training and cognitive stimulation. [French, English]                                                             | Conference abstract |
| Bamidis, P.; Frantzidis, C.; Kyrillidou, A.; Ladas, A.; Grigoriadou, E.; Billis, A.; Konstantinidis, E.; Zilidou, V.; Mouzakidis, C.; Semertzidou, A.; Karagianni, M.; Vivas, A.; Tsolaki, M.                                                                                                                                                                                 | 2011 | Cognitive training, physical exercise and information technology: Neuroscientific challenges and first evidence from the LLM project                                                                                      | Conference abstract |
| Bahar-Fuchs, A.; Cherbuin, N.; Rebok, G.; Herath, P.; Anstey, K.                                                                                                                                                                                                                                                                                                              | 2013 | The body, brain, life program: Baseline characteristics of an online multidomain intervention to reduce the risk of Alzheimer's disease                                                                                   | Conference abstract |
| Ang, J. O.; Dominguez, J. C.; Del Moral, C.; Decena, J. M.; Natividad, B. P.                                                                                                                                                                                                                                                                                                  | 2015 | Development and compliance to a community-based intervention for mci                                                                                                                                                      | Conference abstract |
| Silva, N. C. B. S.; Gill, D. P.; Gregory, M. A.; De Cruz, A.; Petrella, R. J.                                                                                                                                                                                                                                                                                                 | 2016 | The efficacy of a multi-modality exercise program combined with mind motortask training for older adults at risk of cognitive impairment on usual and dual-task gait: A randomized controlled trial                       | Conference abstract |
| Realdon, O.; Rossetto, F.; Nalin, M.; Baroni, I.; Romano, M.; Catania, F.; Mancastroppa, S.; Frontini, D.; Bandini, S.; Nemni, R.; Mantovani, F.; Baglio, F.                                                                                                                                                                                                                  | 2016 | Experienced usability and adherence to treatment in a technology-enhanced continuum of care program with respect to usual care in MCI and outpatients with Alzheimer: The ability program                                 | Conference abstract |
| Trushkova-Zhuravleva, N.; Zelano, G.                                                                                                                                                                                                                                                                                                                                          | 2016 | Combined training of motor coordination and working memory exercises is an effective tool to improve cognitive functions in the elderly                                                                                   | Conference abstract |
| Ploughman, M.; Eskes, G. A.; Kelly, L. P.; Kirkland, M. C.; Devasahayam, A. J.; Wallack, E. M.; Abraha, B.; Hasan, S. M. M.; Downer, M. B.; Wilson, G. C.; Skene,                                                                                                                                                                                                             | 2018 | Combining aerobic exercise and cognitive training in chronic stroke; enhanced cognition predicted by IGF-1                                                                                                                | Conference abstract |

|                                                                                                                                                                                   |      |                                                                                                                                                                                                 |                     |
|-----------------------------------------------------------------------------------------------------------------------------------------------------------------------------------|------|-------------------------------------------------------------------------------------------------------------------------------------------------------------------------------------------------|---------------------|
| E.; Sharma, I.; Chaves, A. R.; Curtis, M. E.; Robertson, G. S.; Moore, C.; McCarthy, J.; MacKay-Lyons, M.                                                                         |      |                                                                                                                                                                                                 |                     |
| Ng, T. P.; Lim, L. M.; Niti, M.; Nyunt, M. S. Z.; Feng, L.; Gwee, X.; Ling, A.; Tan, B. Y.; Chan, G.; Khoo, S. M. C.; Ann, S.; Yap, P.; Yap, K. B.                                | 2014 | Effects of nutritional, physical, cognitive interventions on cognitive outcomes in the Singapore frailty intervention trial (S-FIT)                                                             | Conference abstract |
| Cuesta-Vargas, A.; Bedoya-Belmonte, J.; Bueno-Caro, E.; Diaz-Caro, E.; Gonzalez-Sanchez, M.; Ortega-Nunez, G.; Rodriguez-Gonzalez, M.; Galan-Mercant, A.                          | 2016 | Effectiveness of a multicomponent physical training integrated into a multimodal primary care program in hyperfrailty older: A randomized clinical trial-study power-aging                      | Conference abstract |
| Combourieu, L.; Perrot, A.; Bloch, F.; Seux, M. L.; Kemoun, G.                                                                                                                    | 2014 | Effect of three different trainings on executive function and gait speed in MCI old adults                                                                                                      | Conference abstract |
| Caciula, M. C.; Horvat, M.; Croce, R.                                                                                                                                             | 2015 | High-frequency exercise improves executive function in individuals with Parkinson's disease                                                                                                     | Conference abstract |
| Bruno, R.; Del Turco, S.; Stea, F.; Iannarella, R.; Ghiadoni, L.; Taddei, S.; Tognoni, G.; Maffei, L.; Berardi, N.; Picano, E.; Sicari, R.                                        | 2014 | Effect of combined cognitive exercise training on vascular and cognitive function in patients with mild cognitive impairment: The "train the brain" study                                       | Conference abstract |
| Bruno, M. R.; Sicari, R.; Stea, F.; Ghiadoni, L.; Taddei, S.; Ungar, A.; Bonuccelli, U.; Tognoni, G.; Gargani, L.; D'Angelo, G.; Pratali, L.; Berardi, N.; Maffei, L.; Picano, E. | 2017 | Effect of a multimodality training on cognitive and vascular function in MCI patients with or without hypertension: The train the brain-mind the vessel study                                   | Conference abstract |
| Bittner, D. M.; Bittner, V.; Hausmann, J.; Reinhold, D.; Machts, J.; Westphal, S.; Heinze, H. J.; Schott, B.; Kaufmann, J.; Muller, N. J.                                         | 2013 | Training Intervention Improves Memory in Mild Cognitive Impairment and Healthy Controls, but Plasma BDNF Acts Differentially                                                                    | Conference abstract |
| Binder, J.; Zollig, J.; Martin, M.; Eschen, A.; Merillat, S.; Roche, C.; Jancke, L.                                                                                               | 2013 | A Comparison of Multi-Domain and Single-Domain Cognitive Trainings in Old Age                                                                                                                   | Conference abstract |
| Pompeu, J. E.; Silva, K. G.; Freitas, T. B.; Nuvolini, R. A.; Dona, F.; Torriani-Pasin, C.; Ganaca, F. F.; Ferraz, H. B.                                                          | 2016 | Effect of European physiotherapy guideline for Parkinson's disease and Microsoft Kinect adventures games training on postural control, cognition and quality of life: Randomized clinical trial | Conference abstract |
| Rehfeld, K.; Hokelmann, A.; Lehmann, W.; Blaser, P.                                                                                                                               | 2013 | The Impact of a Sportive Dance Program on Cognitive Skills (Fluid Intelligence, General Intelligence and Working Memory) in Elderly                                                             | Conference abstract |
| Fernandez-Del-Olmo, M.; Sanchez-Molina, Ja; Fernandez-Lago, H.; Morenilla-Burlo, L.; Gomez-Varela, J.; Fogelson, N.                                                               | 2018 | Effects of computerized cognitive training, with and without concurrent exercise, on executive functions in Parkinson's disease                                                                 | Conference abstract |
| Fujibayashi, M.; Nishiwaki, M.; Ogawa, N.; Nanayama, C.                                                                                                                           | 2019 | The effect of exercise intervention depends on cognitive level                                                                                                                                  | Conference abstract |
| Hung, J. W.; Chou, C. X.; Wu, W. C.; Hsieh, Y. W.; Yu, M. Y.; Chen, P. C.                                                                                                         | 2017 | Comparing effects of two exergaming systems and traditional weight shifting training on executive and balance functions in patients with chronic stroke-a randomized control trial              | Conference abstract |
| Katula, J. A.                                                                                                                                                                     | 2011 | Physical activity, cognitive training, and cognitive functioning in older adults: The seniors health and activity research program                                                              | Conference abstract |
| Bourkel, E.; Hubsch, G.; Federspiel, C.; Steinmetz, J. P.                                                                                                                         | 2017 | The influence of cognitive and mobility training programmes on cognitive functioning among healthy elderly people and people with MCI                                                           | Conference abstract |
| Bherer, L.                                                                                                                                                                        | 2013 | Benefits of Exercise Training Intervention on Attentional Control and Quality of Life in Healthy and Frail Older Adults                                                                         | Conference abstract |
| Bherer, L.                                                                                                                                                                        | 2011 | Physical exercise and cognitive training for attentional control in older adults                                                                                                                | Conference abstract |
| Anonymous,                                                                                                                                                                        | 2012 | 'Mental exercise' boosts cognitive function in dementia                                                                                                                                         | Conference abstract |
| Schumacher, V.; Theill, N.; Martin, M.                                                                                                                                            | 2013 | Improving Cognitive Performance and Motor-Cognition Adaptability of Older Adults Using an Integrative Motor-Cognitive Training Approach                                                         | Conference abstract |
| Wang, L.; Denny, K.; Bergman, S. R.; Potter, G.; Steffens, D.                                                                                                                     | 2012 | Neural mechanisms of wii fit plus: Reducing depressive symptoms and improving cognition in older adults                                                                                         | Conference abstract |
| Yesilyaprak, S. S.; Senduran, M.; Tomruk, M.; Altin, O.; Algun, Z. C.                                                                                                             | 2014 | The effects of exercises performed with virtual reality system on balance and fall risk in the elderly. [Turkish, English]                                                                      | Conference abstract |
| Barbosa, A. R.; Guimaraes, A. V.                                                                                                                                                  | 2015 | Effects of exergames on cognitive performance and functional fitness in older adults: A pilot study                                                                                             | Conference abstract |
| Shah, T.; Verdile, G.; Sohrabi, H.; Martins, R.                                                                                                                                   | 2012 | Physical activity and cognitive stimulation improve cognition and alter levels of plasma beta-amyloid in healthy elderly                                                                        | Conference abstract |
| Simonetto, M.; Dong, C.; Gutierrez, C. M.; Wright, C. B.; Loewenstein, D.; Sacco, R.                                                                                              | 2018 | Gender disparities in cognitive, motor and mood outcomes: Preliminary data from the bugher foundation's combined aerobic                                                                        | Conference abstract |

|                                                                                                                                                                                                                                                                                                                                                                    |      |                                                                                                                                                                                                                                                                                   |                         |
|--------------------------------------------------------------------------------------------------------------------------------------------------------------------------------------------------------------------------------------------------------------------------------------------------------------------------------------------------------------------|------|-----------------------------------------------------------------------------------------------------------------------------------------------------------------------------------------------------------------------------------------------------------------------------------|-------------------------|
| L.; Koch, S.; Rundek, T.                                                                                                                                                                                                                                                                                                                                           |      | and resistance exercise training (CARET) program and cognitive training intervention (CTI) study                                                                                                                                                                                  |                         |
| Gschwind, Y. J.; Schoene, D.; Lord, S. R.; Ejupi, A.; Valenzuela, T.; Aal, K.; Woodbury, A.; Delbaere, K.                                                                                                                                                                                                                                                          | 2015 | The effect of sensor-based exercise at home on functional performance associated with fall risk in older people - a comparison of two exergame interventions                                                                                                                      | Data appears elsewhere  |
| Vermeylen, W.; Delbroek, T.; Spildooren, J.                                                                                                                                                                                                                                                                                                                        | 2016 | Effects of cognitive-motor dual task training with the Bio Rescue force platform on cognition, balance and dual task performance in institutionalized older adults                                                                                                                | Data appears elsewhere  |
| Hagovska, M.; Olekszyova, Z.                                                                                                                                                                                                                                                                                                                                       | 2016 | Relationships between balance control and cognitive functions, gait speed, and activities of daily living                                                                                                                                                                         | Data appears elsewhere  |
| Heath, M.; Shellington, E.; Titheridge, S.; Gill, D. P.; Petrella, R. J.                                                                                                                                                                                                                                                                                           | 2017 | A 24-week multi-modality exercise program improves executive control in older adults with a self-reported cognitive complaint: Evidence from the antisaccade task                                                                                                                 | Data appears elsewhere  |
| Preiss, M.; Waidingerova, I.; Steinova, D.                                                                                                                                                                                                                                                                                                                         | 2012 | Subjective effectivity of memory training and physical exercises in seniors - 6-month follow-up. [Czech]                                                                                                                                                                          | Full text not available |
| Kalbe, E.; Roheger, M.; Paluszak, K.; Meyer, J.; Becker, J.; Fink, G. R.; Kukulja, J.; Rahn, A.; Szabados, F.; Wirth, B.; Kessler, J.                                                                                                                                                                                                                              | 2018 | Effects of a Cognitive Training With and Without Additional Physical Activity in Healthy Older Adults: A Follow-Up 1 Year After a Randomized Controlled Trial                                                                                                                     | Long-term follow-up     |
| van Santen, J.; Droes, R. M.; Bosmans, J. E.; Blanson Henkemans, O. A.; van Bommel, S.; Hakvoort, E.; Valk, R.; Scholten, C.; Wiersinga, J.; van Straten, A.; Meiland, F.                                                                                                                                                                                          | 2019 | The (cost-) effectiveness of exergaming in people living with dementia and their informal caregivers: protocol for a randomized controlled trial                                                                                                                                  | Protocol paper          |
| Smith, G.; Chandler, M.; Locke, D. E.; Fields, J.; Phatak, V.; Crook, J.; Hanna, S.; Lunde, A.; Morris, M.; Graff-Radford, M.; Hughes, C. A.; Lepore, S.; Cuc, A.; Caselli, M.; Hurst, D.; Wethe, J.; Francone, A.; Eilertsen, J.; Lucas, P.; Hoffman Snyder, C.; Kuang, L.; Becker, M.; Dean, P.; Diehl, N.; Lofquist, M.; Vanderhook, S.; Myles, D.; Cochran, D. | 2017 | Behavioral Interventions to Prevent or Delay Dementia: Protocol for a Randomized Comparative Effectiveness Study                                                                                                                                                                  | Protocol paper          |
| Pothier, K.; Soriano, G.; Lussier, M.; Naudin, A.; Costa, N.; Guyonnet, S.; Piau, A.; Ousset, P. J.; Nourhashemi, F.; Vellas, B.; de Souto Barreto, P.                                                                                                                                                                                                             | 2018 | A web-based multidomain lifestyle intervention with connected devices for older adults: research protocol of the eMIND pilot randomized controlled trial                                                                                                                          | Protocol paper          |
| Gregory, M. A.; Gill, D. P.; Shellington, E. M.; Liu-Ambrose, T.; Shigematsu, R.; Zou, G.; Shoemaker, K.; Owen, A. M.; Hachinski, V.; Stuckey, M.; Petrella, R. J.                                                                                                                                                                                                 | 2016 | Group-based exercise and cognitive-physical training in older adults with self-reported cognitive complaints: The Multiple-Modality, Mind-Motor (M4) study protocol                                                                                                               | Protocol paper          |
| Mc Master, M.; Clare, L.; Kim, S.; Torres, S.; Anstey, K. J.                                                                                                                                                                                                                                                                                                       | 2017 | A protocol for a randomised controlled trial of multidomain dementia risk reduction for mild cognitive impairment                                                                                                                                                                 | Protocol paper          |
| McMaster, M.; Kim, S.; Clare, L.; Torres, S. J.; D'Este, C.; Anstey, K. J.                                                                                                                                                                                                                                                                                         | 2018 | Body, brain, life for cognitive decline (BBL-CD): Protocol for a multidomain dementia risk reduction randomized controlled trial for subjective cognitive decline and mild cognitive impairment                                                                                   | Protocol paper          |
| Nouchi, R.; Taki, Y.; Takeuchi, H.; Hashizume, H.; Nozawa, T.; Sekiguchi, A.; Nouchi, H.; Kawashima, R.                                                                                                                                                                                                                                                            | 2012 | Beneficial effects of short-term combination exercise training on diverse cognitive functions in healthy older people: study protocol for a randomized controlled trial                                                                                                           | Protocol paper          |
| Salmoirago-Blotcher, E.; DeCosta, J.; Harris, K.; Breault, C.; Dunsiger, S.; Santos, C.; Snyder, P.                                                                                                                                                                                                                                                                | 2018 | Exploring synergistic effects of aerobic exercise and mindfulness training on cognitive function in older adults: Protocol for a pilot randomized controlled trial                                                                                                                | Protocol paper          |
| Best, J. R.; Eng, J. J.; Davis, J. C.; Hsiung, R.; Hall, P. A.; Middleton, L. E.; Graf, P.; Goldsmith, C. H.; Liu-Ambrose, T.                                                                                                                                                                                                                                      | 2018 | Study protocol for Vitality: A proof-of-concept randomised controlled trial of exercise training or complex mental and social activities to promote cognition in adults with chronic stroke                                                                                       | Protocol paper          |
| Beishon, L.; Evley, R.; Panerai, R. B.; Subramaniam, H.; Mukaetova-Ladinska, E.; Robinson, T.; Haunton, V.                                                                                                                                                                                                                                                         | 2019 | Effects of brain training on brain blood flow (The Cognition and Flow Study - CogFlowS): Protocol for a feasibility randomised controlled trial of cognitive training in dementia                                                                                                 | Protocol paper          |
| Rodriguez-Larrad, A.; Arrieta, H.; Rezola, C.; Kortajarena, M.; Yanguas, J. J.; Iturburu, M.; Susana, M. G.; Irazusta, J.                                                                                                                                                                                                                                          | 2017 | Effectiveness of a multicomponent exercise program in the attenuation of frailty in long-term nursing home residents: study protocol for a randomized clinical controlled trial                                                                                                   | Protocol paper          |
| Yeh, T. T.; Chang, K. C.; Wu, C. Y.; Lee, Y. Y.; Chen, P. Y.; Hung, J. W.                                                                                                                                                                                                                                                                                          | 2018 | Effects and mechanism of the HECT study (hybrid exercise-cognitive trainings) in mild ischemic stroke with cognitive decline: fMRI for brain plasticity, biomarker and behavioral analysis                                                                                        | Protocol paper          |
| Sipila, S.; Tirkkonen, A.; Hanninen, T.; Laukkanen, P.; Alen, M.; Fielding, R. A.; Kivipelto, M.; Kokko, K.; Kulmala, J.; Rantanen, T.; Sihvonen, S. E.; Sillanpaa, E.; Stigsdotter-Neely, A.; Tormakangas, T.                                                                                                                                                     | 2018 | Promoting safe walking among older people: the effects of a physical and cognitive training intervention vs. physical training alone on mobility and falls among older community-dwelling men and women (the PASSWORD study): design and methods of a randomized controlled trial | Protocol paper          |

|                                                                                                                                                                                                                                                                                             |      |                                                                                                                                                                                                                                      |                            |
|---------------------------------------------------------------------------------------------------------------------------------------------------------------------------------------------------------------------------------------------------------------------------------------------|------|--------------------------------------------------------------------------------------------------------------------------------------------------------------------------------------------------------------------------------------|----------------------------|
| Witlox, L.; Schagen, S. B.; De Ruiter, M. B.; Geerlings, M. I.; Peeters, P. H. M.; Koevoets, E. W.; Van Der Wall, E.; Stuiver, M.; Sonke, G.; Velthuis, M. J.; Palen, J. A. M. V. D.; Jobsen, J. J.; May, A. M.; Monnikhof, E. M.                                                           | 2019 | Effect of physical exercise on cognitive function and brain measures after chemotherapy in patients with breast cancer (PAM study): Protocol of a randomised controlled trial                                                        | Protocol paper             |
| Yeh, T. T.; Wu, C. Y.; Hsieh, Y. W.; Chang, K. C.; Lee, L. C.; Hung, J. W.; Lin, K. C.; Teng, C. H.; Liao, Y. H.                                                                                                                                                                            | 2017 | Synergistic effects of aerobic exercise and cognitive training on cognition, physiological markers, daily function, and quality of life in stroke survivors with cognitive decline: Study protocol for a randomized controlled trial | Protocol paper             |
| Monteiro-Junior, R. S.; Figueiredo, L. F. D. S.; Maciel-Pinheiro, P. D. T.; Abud, E. L. R.; Engedal, K.; Barca, M. L.; Nascimento, O. J. M.; Laks, J.; Deslandes, A. C.                                                                                                                     | 2017 | Virtual Reality-Based Physical Exercise With Exergames (PhysEx) Improves Mental and Physical Health of Institutionalized Older Adults                                                                                                | Control group not eligible |
| Schattin, A.; Baier, C.; Mai, D.; Klamroth-Marganska, V.; Herter-Aeberli, I.; de Bruin, E. D.                                                                                                                                                                                               | 2019 | Effects of exergame training combined with omega-3 fatty acids on the elderly brain: a randomized double-blind placebo-controlled trial                                                                                              | Control group not eligible |
| Gill, D. P.; Gregory, M. A.; Zou, G.; Liu-Ambrose, T.; Shigematsu, R.; Hachinski, V.; Fitzgerald, C.; Petrella, R. J.                                                                                                                                                                       | 2016 | The Healthy Mind, Healthy Mobility Trial: A Novel Exercise Program for Older Adults                                                                                                                                                  | Control group not eligible |
| Choi, W.; Lee, S.                                                                                                                                                                                                                                                                           | 2019 | Virtual Kayak Paddling Exercise Improves Postural Balance, Muscle Performance, and Cognitive Function in Older Adults with Mild Cognitive Impairment: A Randomized Controlled Trial                                                  | Intervention not eligible  |
| Eleni, P.; Fotini, K.; Christina, A.; Evaggelia, B.; Aikaterini, S.; Stavros, Z.; Georgia, B.; Despoina, L.; Evdokia, N.; Maria, V.; Fani, O.; Nefeli, M.; Myrto, Z.; Christos, M.; Magda, T.                                                                                               | 2017 | Use it more and keep it alive: A Longitudinal Randomized Controlled Trial in people with Mild Cognitive Impairment                                                                                                                   | Intervention not eligible  |
| Brown, D. R.; Wang, Y.; Ward, A.; Ebbeling, C. B.; Fortlage, L.; Puleo, E.; Benson, H.; Rippe, J. M.                                                                                                                                                                                        | 1995 | Chronic psychological effects of exercise and exercise plus cognitive strategies                                                                                                                                                     | Intervention not eligible  |
| Lam, L. C. W.; Chau, R. C. M.; Wong, B. M. L.; Fung, A. W. T.; Tam, C. W. C.; Leung, G. T. Y.; Kwok, T. C. Y.; Leung, T. Y. S.; Ng, S. P.; Chan, W. M.                                                                                                                                      | 2012 | A 1-Year Randomized Controlled Trial Comparing Mind Body Exercise (Tai Chi) With Stretching and Toning Exercise on Cognitive Function in Older Chinese Adults at Risk of Cognitive Decline                                           | Intervention not eligible  |
| Lam, L.; Fung, A.; Chan, W.                                                                                                                                                                                                                                                                 | 2013 | A one year randomized controlled trial of structured lifestyle activity intervention on cognitive function in Chinese older adults with very mild cognitive deficits                                                                 | Intervention not eligible  |
| Hernandez, S. S.; Coelho, F. G.; Gobbi, S.; Stella, F.                                                                                                                                                                                                                                      | 2010 | [Effects of physical activity on cognitive functions, balance and risk of falls in elderly patients with Alzheimer's dementia]                                                                                                       | Intervention not eligible  |
| Vigano, G.; Squassoni, N.; Pancaldi, L.; Evangelisti, E.; Balzarolo, C.                                                                                                                                                                                                                     | 2012 | Wii gaming system for the rehabilitation in nursing home residents suffering from motor and mild to moderate cognitive impairment                                                                                                    | Intervention not eligible  |
| Venturelli, M.; Sollima, A.; Ce, E.; Limonta, E.; Bisconti, A. V.; Brasioli, A.; Muti, E.; Esposito, F.                                                                                                                                                                                     | 2016 | Effectiveness of Exercise- and Cognitive-Based Treatments on Salivary Cortisol Levels and Sundowning Syndrome Symptoms in Patients with Alzheimer's Disease                                                                          | Intervention not eligible  |
| Rosenberg, A.; Ngandu, T.; Rusanen, M.; Antikainen, R.; Backman, L.; Havulinna, S.; Hanninen, T.; Laatikainen, T.; Lehtisalo, J.; Levalahti, E.; Lindstrom, J.; Paajanen, T.; Peltonen, M.; Soininen, H.; Stigsdotter-Neely, A.; Strandberg, T.; Tuomilehto, J.; Solomon, A.; Kivipelto, M. | 2018 | Multidomain lifestyle intervention benefits a large elderly population at risk for cognitive decline and dementia regardless of baseline characteristics: The FINGER trial                                                           | Intervention not eligible  |
| Park, J. E.; Jeon, S. Y.; Kim, S. A.; Kim, J. H.; Kim, S. H.; Lee, K. W.; Hwang, Y. J.; Jung, G.; Suk, H. W.; Park, S.; Lee, D. Y.                                                                                                                                                          | 2019 | A Multidomain Intervention for Modifying Lifestyle Habits Reduces the Dementia Risk in Community-Dwelling Older Adults: A Single-Blinded Randomized Controlled Pilot Study                                                           | Intervention not eligible  |
| Mirelman, A.; Rochester, L.; Maidan, I.; Del Din, S.; Alcock, L.; Nieuwhof, F.; Rikkert, M. O.; Bloem, B. R.; Pelosin, E.; Avanzino, L.; Abbruzzese, G.; Dockx, K.; Bekkers, E.; Giladi, N.; Nieuwboer, A.; Hausdorff, J. M.                                                                | 2016 | Addition of a non-immersive virtual reality component to treadmill training to reduce fall risk in older adults (V-TIME): a randomised controlled trial                                                                              | Intervention not eligible  |
| Ordnung, M.; Hoff, M.; Kaminski, E.; Villringer, A.; Ragert, P.                                                                                                                                                                                                                             | 2017 | No overt effects of a 6-week exergame training on sensorimotor and cognitive function in older adults. A preliminary investigation                                                                                                   | Intervention not eligible  |
| Okamura, H.; Otani, M.; Shimoyama, N.; Fujii, T.                                                                                                                                                                                                                                            | 2018 | Combined Exercise and Cognitive Training System for Dementia Patients: A Randomized Controlled Trial                                                                                                                                 | Intervention not eligible  |
| Lam, L. C. W.; Chau, R. C. M.; Wong, B. M. L.; Fung, A. W. T.; Lui, V. W. C.; Tam,                                                                                                                                                                                                          | 2011 | Interim follow-up of a randomized controlled trial comparing Chinese style mind body (Tai Chi) and stretching exercises on                                                                                                           | Intervention not eligible  |



|                                                                                                                                                                        |      |                                                                                                                                                                                                                       |                           |
|------------------------------------------------------------------------------------------------------------------------------------------------------------------------|------|-----------------------------------------------------------------------------------------------------------------------------------------------------------------------------------------------------------------------|---------------------------|
| C. C. W.; Leung, G. T. Y.; Kwok, T. C. Y.; Chiu, H. F. K.; Ng, S.; Chan, W. M.                                                                                         |      | cognitive function in subjects at risk of progressive cognitive decline                                                                                                                                               |                           |
| Kattenstroth, J. C.; Kalisch, T.; Holt, S.; Tegenthoff, M.; Dinse, H. R.                                                                                               | 2013 | Six months of dance intervention enhances postural, sensorimotor, and cognitive performance in elderly without affecting cardio-respiratory functions                                                                 | Intervention not eligible |
| Bae, S.; Lee, S.; Jung, S.; Makino, K.; Harada, K.; Shinkai, Y.; Chiba, I.; Shimada, H.                                                                                | 2019 | The effect of a multicomponent intervention to promote community activity on cognitive function in older adults with mild cognitive impairment: A randomized controlled trial                                         | Intervention not eligible |
| Tabei, K. I.; Satoh, M.; Ogawa, J. I.; Tokita, T.; Nakaguchi, N.; Nakao, K.; Kida, H.; Tomimoto, H.                                                                    | 2017 | Physical exercise with music reduces gray and white matter loss in the frontal cortex of elderly people: The mihama-kiho scan project                                                                                 | Intervention not eligible |
| Prick, A. E.; de Lange, J.; Scherder, E.; Twisk, J.; Pot, A. M.                                                                                                        | 2017 | The Effects of a Multicomponent Dyadic Intervention With Physical Exercise on the Cognitive Functioning of People With Dementia: A Randomized Controlled Trial                                                        | Intervention not eligible |
| Law, L. L. F.; Barnett, F.; Yau, M. K.; Gray, M. A.                                                                                                                    | 2014 | Effects of functional tasks exercise on older adults with cognitive impairment at risk of Alzheimer's disease: A randomised controlled trial                                                                          | Intervention not eligible |
| Hu, J. P.; Guo, Y. H.; Wang, F.; Zhao, X. P.; Zhang, Q. H.; Song, Q. H.                                                                                                | 2014 | Exercise improves cognitive function in aging patients                                                                                                                                                                | Intervention not eligible |
| Hsieh, C. C.; Lin, P. S.; Hsu, W. C.; Wang, J. S.; Huang, Y. C.; Lim, A. Y.; Hsu, Y. C.                                                                                | 2019 | The effectiveness of a virtual reality-based tai chi exercise on cognitive and physical function in older adults with cognitive impairment                                                                            | Intervention not eligible |
| Nouchi, R.; Taki, Y.; Takeuchi, H.; Sekiguchi, A.; Hashizume, H.; Nozawa, T.; Nouchi, H.; Kawashima, R.                                                                | 2014 | Four weeks of combination exercise training improved executive functions, episodic memory, and processing speed in healthy elderly people: Evidence from a randomized controlled trial                                | Intervention not eligible |
| Park, J.; Yim, J. E.                                                                                                                                                   | 2016 | A new approach to improve cognition, muscle strength, and postural balance in community-dwelling elderly with a 3-D virtual reality Kayak program                                                                     | Intervention not eligible |
| Anderson-Hanley, C.; Maloney, M.; Barcelos, N.; Striegnitz, K.; Kramer, A.                                                                                             | 2017 | Neuropsychological Benefits of Neuro-Exergaming for Older Adults: A Pilot Study of an Interactive Physical and Cognitive Exercise System (iPACES)                                                                     | Intervention not eligible |
| Yokoyama, H.; Okazaki, K.; Imai, D.; Yamashina, Y.; Takeda, R.; Naghavi, N.; Ota, A.; Hirasawa, Y.; Miyagawa, T.                                                       | 2015 | The effect of cognitive-motor dual-task training on cognitive function and plasma amyloid beta peptide 42/40 ratio in healthy elderly persons: a randomized controlled trial                                          | Intervention not eligible |
| Wollesen, B.; Mattes, K.; Schulz, S.; Bischoff, L. L.; Seydell, L.; Bell, J. W.; von Duvillard, S. P.                                                                  | 2017 | Effects of dual-task management and resistance training on gait performance in older individuals: A randomized controlled trial                                                                                       | Intervention not eligible |
| Young, D. K.                                                                                                                                                           | 2018 | Multicomponent intervention combining a cognitive stimulation group and tai chi to reduce cognitive decline among community-dwelling older adults with probable dementia: A multi-center, randomized controlled trial | Intervention not eligible |
| Suzuki, T.; Shimada, H.; Makizako, H.; Doi, T.; Yoshida, D.; Tsutsumimoto, K.; Anan, Y.; Uemura, K.; Lee, S.; Park, H.                                                 | 2012 | Effects of multicomponent exercise on cognitive function in older adults with amnesic mild cognitive impairment: A randomized controlled trial                                                                        | Intervention not eligible |
| Suzuki, T.; Shimada, H.; Makizako, H.; Doi, T.; Yoshida, D.; Ito, K.; Shimokata, H.; Washimi, Y.; Endo, H.; Kato, T.                                                   | 2013 | A Randomized Controlled Trial of Multicomponent Exercise in Older Adults with Mild Cognitive Impairment                                                                                                               | Intervention not eligible |
| Rehfeld, K.; Luders, A.; Hokelmann, A.; Lessmann, V.; Kaufmann, J.; Brigadski, T.; Muller, P.; Muller, N. G.                                                           | 2018 | Dance training is superior to repetitive physical exercise in inducing brain plasticity in the elderly                                                                                                                | Intervention not eligible |
| Anderson-Hanley, C.; Arciero, P. J.; Westen, S. C.; Nimon, J.; Zimmerman, E.                                                                                           | 2012 | Neuropsychological benefits of stationary bike exercise and a cybicycle exergame for older adults with diabetes: An exploratory analysis                                                                              | Intervention not eligible |
| Anderson-Hanley, C.; Arciero, P. J.; Brickman, A. M.; Nimon, J. P.; Okuma, N.; Westen, S. C.; Merz, M. E.; Pence, B. D.; Woods, J. A.; Kramer, A. F.; Zimmerman, E. A. | 2012 | Exergaming and older adult cognition: A cluster randomized clinical trial                                                                                                                                             | Intervention not eligible |
| Yoon, D. H.; Kang, D.; Kim, H. J.; Kim, J. S.; Song, H. S.; Song, W.                                                                                                   | 2017 | Effect of elastic band-based high-speed power training on cognitive function, physical performance and muscle strength in older women with mild cognitive impairment                                                  | Intervention not eligible |
| Yoon, D. H.; Lee, J. Y.; Song, W.                                                                                                                                      | 2018 | Effects of Resistance Exercise Training on Cognitive Function and Physical Performance in Cognitive Frailty: A Randomized Controlled Trial                                                                            | Intervention not eligible |
| Walsh, J. N.; Manor, B.; Hausdorff, J.; Novak, V.; Lipsitz, L.; Gow, B.; Macklin, E. A.; Peng, C. K.; Wayne, P. M.                                                     | 2015 | Impact of short- and long-term Tai Chi mind-body exercise training on cognitive function in healthy adults: Results from a hybrid observational study and randomized trial                                            | Intervention not eligible |
| Sugano, K.; Yokogawa, M.; Yuki, S.; Dohmoto, C.; Yoshita, M.; Hamaguchi, T.;                                                                                           | 2012 | Effect of cognitive and aerobic training intervention on older adults with mild or no cognitive impairment: a derivative study                                                                                        | Intervention not eligible |

|                                                                                                                                                                                                                                                                                                                            |      |                                                                                                                                                                        |                           |
|----------------------------------------------------------------------------------------------------------------------------------------------------------------------------------------------------------------------------------------------------------------------------------------------------------------------------|------|------------------------------------------------------------------------------------------------------------------------------------------------------------------------|---------------------------|
| Yanase, D.; Iwasa, K.; Komai, K.; Yamada, M.                                                                                                                                                                                                                                                                               |      | of the nakajima project                                                                                                                                                |                           |
| Beck, Cornelia; Fausett, Jennifer Kleiner; Krukowski, Rebecca A.; Cornell, Carol E.; Prewitt, T.; Lensing, Shelly; Bursac, Zoran; Felix, Holly C.; Love, ShaRhonda; McDougall, Graham; West, Delia Smith                                                                                                                   | 2013 | A randomized trial of a community-based cognitive intervention for obese senior adults                                                                                 | Intervention not eligible |
| Gobbi, L. T. B.; Lahr, J.; Santos, P. C. R.; Pelicioni, P. H. S.; Batistela, R. A.; Rodrigues, M. M. L.; Hernandez, F.; Beretta, S.; Zampier, V.                                                                                                                                                                           | 2014 | Physical exercise can improve cognitive functions in Parkinson's disease                                                                                               | Intervention not eligible |
| Klusmann, V.; Evers, A.; Schwarzer, R.; Dimeo, F. C.; Reischies, F. M.; Heuser, I.                                                                                                                                                                                                                                         | 2009 | Complex mental and physical activity in older women maintains episodic memory and working memory: A 6-month randomized controlled trial                                | Intervention not eligible |
| Klusmann, V.; Evers, A.; Schwarzer, R.; Schlattmann, P.; Reischies, F. M.; Heuser, I.; Dimeo, F. C.                                                                                                                                                                                                                        | 2010 | Complex mental and physical activity in older women and cognitive performance: a 6-month randomized controlled trial                                                   | Intervention not eligible |
| Jansen, P.; Dahmen-Zimmer, K.                                                                                                                                                                                                                                                                                              | 2012 | Effects of cognitive, motor, and karate training on cognitive functioning and emotional well-being of elderly people                                                   | Intervention not eligible |
| Monteiro-Junior, R. S.; da Silva Figueiredo, L. F.; Maciel-Pinheiro, P. T.; Abud, E. L. R.; Braga, A. E. M. M.; Barca, M. L.; Engedal, K.; Nascimento, O. J. M.; Deslandes, A. C.; Laks, J.                                                                                                                                | 2017 | Acute effects of exergames on cognitive function of institutionalized older persons: a single-blinded, randomized and controlled pilot study                           | Intervention not eligible |
| Gajewski, P. D.; Falkenstein, M.                                                                                                                                                                                                                                                                                           | 2018 | ERP and behavioral effects of physical and cognitive training on working memory in aging: A randomized controlled study                                                | Intervention not eligible |
| Frantzidis, C. A.; Ladas, A. K. I.; Vivas, A. B.; Tsolaki, M.; Bamidis, P. D.                                                                                                                                                                                                                                              | 2014 | Cognitive and physical training for the elderly: Evaluating outcome efficacy by means of neurophysiological synchronization                                            | Intervention not eligible |
| Fissler, P.; Muller, H. P.; Kuster, O. C.; Laptinskaya, D.; Thurm, F.; Woll, A.; Elbert, T.; Kassubek, J.; von Arnim, C. A. F.; Kolassa, I. T.                                                                                                                                                                             | 2017 | No evidence that short-term cognitive or physical training programs or lifestyles are related to changes in white matter integrity in older adults at risk of dementia | Intervention not eligible |
| Gavelin, H. M.; Boraxbekk, C. J.; Stenlund, T.; Jarvholm, L. S.; Neely, A. S.                                                                                                                                                                                                                                              | 2015 | Effects of a process-based cognitive training intervention for patients with stress-related exhaustion                                                                 | Intervention not eligible |
| Goghari, Vina M.; Lawlor-Savage, Linette                                                                                                                                                                                                                                                                                   | 2018 | Self-perceived benefits of cognitive training in healthy older adults                                                                                                  | Intervention not eligible |
| Galindo Munoz, J. S.; Morillas-Ruiz, J. M.; Gallego, M. G.; Diaz Soler, I.; Del Carmen Barbera Ortega, M.; Martinez, C. M.; Morante, J. J. H.                                                                                                                                                                              | 2019 | Cognitive training therapy improves the effect of hypocaloric treatment on subjects with overweight/obesity: A randomised clinical trial                               | Intervention not eligible |
| Kim, G. H.; Jeon, S.; Im, K.; Kwon, H.; Lee, B. H.; Kim, G. Y.; Jeong, H.; Han, N. E.; Seo, S. W.; Cho, H.; Noh, Y.; Park, S. E.; Kim, H.; Hwang, J. W.; Yoon, C. W.; Kim, H. J.; Ye, B. S.; Chin, J. H.; Kim, J. H.; Suh, M. K.; Lee, J. M.; Kim, S. T.; Choi, M. T.; Kim, M. S.; Heilman, K. M.; Jeong, J. H.; Na, D. L. | 2015 | Structural brain changes after traditional and robot-assisted multi-domain cognitive training in community-dwelling healthy elderly                                    | Intervention not eligible |
| Jirayucharoensak, S.; Israsena, P.; Pan-Ngum, S.; Hemrungronj, S.; Maes, M.                                                                                                                                                                                                                                                | 2019 | A game-based neurofeedback training system to enhance cognitive performance in healthy elderly subjects and in patients with amnesic mild cognitive impairment         | Intervention not eligible |
| Jelcic, N.; Agostini, M.; Meneghello, F.; Busse, C.; Parise, S.; Galano, A.; Tonin, P.; Dam, M.; Cagnin, A.                                                                                                                                                                                                                | 2014 | Feasibility and efficacy of cognitive telerehabilitation in early Alzheimer's disease: A pilot study                                                                   | Intervention not eligible |
| Huang, Kuo-Ting                                                                                                                                                                                                                                                                                                            | 2018 | Moving with presence: A virtual reality-based exergames intervention to improve the executive functions of adults aged 50 and older                                    | Intervention not eligible |
| Marusic, U.; Giordani, B.; Moffat, S. D.; Petric, M.; Dolenc, P.; Pisot, R.; Kavcic, V.                                                                                                                                                                                                                                    | 2018 | Computerized cognitive training during physical inactivity improves executive functioning in older adults                                                              | Intervention not eligible |
| Hardy, J. L.; Nelson, R. A.; Thomason, M. E.; Sternberg, D. A.; Katovich, K.; Farzin, F.; Scanlon, M.                                                                                                                                                                                                                      | 2015 | Enhancing Cognitive Abilities with Comprehensive Training: A Large, Online, Randomized, Active-Controlled Trial                                                        | Intervention not eligible |
| Mozolic, J. L.; Long, A. B.; Morgan, A. R.; Rawley-Payne, M.; Laurienti, P. J.                                                                                                                                                                                                                                             | 2011 | A cognitive training intervention improves modality-specific attention in a randomized controlled trial of healthy older adults                                        | Intervention not eligible |
| Nozawa, T.; Taki, Y.; Kanno, A.; Akimoto, Y.; Ihara, M.; Yokoyama, R.; Kotozaki, Y.; Nouchi, R.; Sekiguchi, A.; Takeuchi, H.; Miyauchi, C. M.; Ogawa, T.; Goto, T.;                                                                                                                                                        | 2015 | Effects of Different Types of Cognitive Training on Cognitive Function, Brain Structure, and Driving Safety in Senior Daily Drivers: A Pilot Study                     | Intervention not eligible |

|                                                                                                                                                                                                                                                                                                                      |      |                                                                                                                                                                                                                                              |                           |
|----------------------------------------------------------------------------------------------------------------------------------------------------------------------------------------------------------------------------------------------------------------------------------------------------------------------|------|----------------------------------------------------------------------------------------------------------------------------------------------------------------------------------------------------------------------------------------------|---------------------------|
| Sunda, T.; Shimizu, T.; Tozuka, E.; Hirose, S.; Nanbu, T.; Kawashima, R.                                                                                                                                                                                                                                             |      |                                                                                                                                                                                                                                              |                           |
| Ross, L. A.; Sprague, B. N.; Phillips, C. B.; O'Connor, M. L.; Dodson, J. E.                                                                                                                                                                                                                                         | 2018 | The Impact of Three Cognitive Training Interventions on Older Adults' Physical Functioning Across 5 Years                                                                                                                                    | Intervention not eligible |
| Goghari, Vina M.; Lawlor-Savage, Linette                                                                                                                                                                                                                                                                             | 2017 | Comparison of cognitive change after working memory training and logic and planning training in healthy older adults                                                                                                                         | Intervention not eligible |
| Amjad, I.; Toor, H.; Niazi, I. K.; Pervaiz, S.; Jochumsen, M.; Shafique, M.; Haavik, H.; Ahmed, T.                                                                                                                                                                                                                   | 2019 | Xbox 360 Kinect Cognitive Games Improve Slowness, Complexity of EEG, and Cognitive Functions in Subjects with Mild Cognitive Impairment: A Randomized Control Trial                                                                          | Intervention not eligible |
| Walton, C. C.; Kavanagh, A.; Downey, L. A.; Lomas, J.; Camfield, D. A.; Stough, C.                                                                                                                                                                                                                                   | 2015 | Online cognitive training in healthy older adults: A preliminary study on the effects of single versus multi-domain training                                                                                                                 | Intervention not eligible |
| Varshney, S.; McCall, W.; Tampi, R.; Varshney, U.                                                                                                                                                                                                                                                                    | 2019 | Dementia: A Cognitive Disability and Role of Non-Pharmacological Intervention Alzhatv in Cognitive Remediation                                                                                                                               | Intervention not eligible |
| Vanoh, D.; Shahar, S.; Razali, R.; Ali, N. M.; Manaf, Z. A.; Noah, S. A. M.; Nur, A. M.                                                                                                                                                                                                                              | 2019 | The Effectiveness of a Web-Based Health Education Tool, WESIHAT 2.0, among Older Adults: A Randomized Controlled Trial                                                                                                                       | Intervention not eligible |
| Edwards, J. D.; Valdes, E. G.; Peronto, C.; Castora-Binkley, M.; Alwerdt, J.; Andel, R.; Lister, J. J.                                                                                                                                                                                                               | 2015 | The Efficacy of InSight Cognitive Training to Improve Useful Field of View Performance: A Brief Report                                                                                                                                       | Intervention not eligible |
| Finn, M.; McDonald, S.                                                                                                                                                                                                                                                                                               | 2011 | Computerised cognitive training for older persons with mild cognitive impairment: A pilot study using a randomised controlled trial design                                                                                                   | Intervention not eligible |
| Cuc, A. V.; Locke, D. E. C.; Duncan, N.; Fields, J. A.; Snyder, C. H.; Hanna, S.; Lunde, A.; Smith, G. E.; Chandler, M.                                                                                                                                                                                              | 2017 | A pilot randomized trial of two cognitive rehabilitation interventions for mild cognitive impairment: caregiver outcomes                                                                                                                     | Intervention not eligible |
| Bergamaschi, S.; Arcara, G.; Calza, A.; Villani, D.; Orgeta, V.; Mondini, S.                                                                                                                                                                                                                                         | 2013 | One-year repeated cycles of cognitive training (CT) for Alzheimer's disease                                                                                                                                                                  | Intervention not eligible |
| Belleville, Sylvie; Hudon, Carol; Bier, Nathalie; Brodeur, Catherine; Gilbert, Brigitte; Grenier, Sebastien; Ouellet, Marie-Christine; Viscogliosi, Chantal; Gauthier, Serge                                                                                                                                         | 2018 | MEMO+: Efficacy, durability and effect of cognitive training and psychosocial intervention in individuals with mild cognitive impairment                                                                                                     | Intervention not eligible |
| Barnes, D. E.; Yaffe, K.; Belfor, N.; Jagust, W. J.; DeCarli, C.; Reed, B. R.; Kramer, J. H.                                                                                                                                                                                                                         | 2009 | Computer-based cognitive training for mild cognitive impairment: Results from a pilot randomized, controlled trial                                                                                                                           | Intervention not eligible |
| Bahar-Fuchs, A.; Barendse, M. E. A.; Bloom, R.; Ravona-Springer, R.; Heymann, A.; Dabush, H.; Bar, L.; Slater, S.; Rassovsky, Y.; Beeri, M. S.                                                                                                                                                                       | 2019 | Computerized cognitive training for older adults at higher dementia risk due to diabetes: findings from a randomized controlled trial                                                                                                        | Intervention not eligible |
| Zimmermann, R.; Gschwandtner, U.; Benz, N.; Hatz, F.; Schindler, C.; Taub, E.; Fuhr, P.                                                                                                                                                                                                                              | 2014 | Cognitive training in Parkinson disease: Cognition-specific vs nonspecific computer training                                                                                                                                                 | Intervention not eligible |
| Ngandu, T.; Lehtisalo, J.; Solomon, A.; Levalhti, E.; Ahtiluoto, S.; Antikainen, R.; Backman, L.; Hanninen, T.; Jula, A.; Laatikainen, T.; Lindstrom, J.; Mangialasche, F.; Paajanen, T.; Pajala, S.; Peltonen, M.; Rauramaa, R.; Stigsdotter-Neely, A.; Strandberg, T.; Tuomilehto, J.; Soininen, H.; Kivipelto, M. | 2015 | A 2 year multidomain intervention of diet, exercise, cognitive training, and vascular risk monitoring versus control to prevent cognitive decline in at-risk elderly people (FINGER): A randomised controlled trial                          | Intervention not eligible |
| Reuter, I.; Mehnert, S.; Sammer, G.; Oechsner, M.; Engelhardt, M.                                                                                                                                                                                                                                                    | 2012 | Efficacy of a multimodal cognitive rehabilitation including psychomotor and endurance training in parkinsons disease                                                                                                                         | Intervention not eligible |
| Padala, K. P.; Padala, P. R.; Lensing, S. Y.; Dennis, R. A.; Bopp, M. M.; Parkes, C. M.; Garrison, M. K.; Dubbert, P. M.; Roberson, P. K.; Sullivan, D. H.                                                                                                                                                           | 2017 | Efficacy of Wii-Fit on Static and Dynamic Balance in Community Dwelling Older Veterans: A Randomized Controlled Pilot Trial                                                                                                                  | Intervention not eligible |
| Matz, K.; Teuschl, Y.; Firlinger, B.; Dachenhausen, A.; Keindl, M.; Seyfang, L.; Tuomilehto, J.; Brainin, M.                                                                                                                                                                                                         | 2015 | Multidomain lifestyle interventions for the prevention of cognitive decline after ischemic stroke randomized trial                                                                                                                           | Intervention not eligible |
| De Souto Barreto, P.; Rolland, Y.; Cesari, M.; Dupuy, C.; Andrieu, S.; Vellas, B.                                                                                                                                                                                                                                    | 2018 | Effects of multidomain lifestyle intervention, omega-3 supplementation or their combination on physical activity levels in older adults: Secondary analysis of the Multidomain Alzheimer Preventive Trial (MAPT) randomised controlled trial | Intervention not eligible |
| Suwardianto, H.; Prasetyo, A.; Utami, R. S.                                                                                                                                                                                                                                                                          | 2018 | Effects of physical-cognitive therapy (PCT) on critically ill patients in intensive care unit                                                                                                                                                | Intervention not eligible |
| Small, G. W.; Silverman, D. H. S.; Siddarth, P.; Ercoli, L. M.; Miller, K. J.; Lavretsky, H.; Wright, B. C.; Bookheimer, S. Y.; Barrio, J. R.; Phelps, M. E.                                                                                                                                                         | 2006 | Effects of a 14-day healthy longevity lifestyle program on cognition and brain function                                                                                                                                                      | Intervention not eligible |

|                                                                                                                                                                                                          |      |                                                                                                                                                                                                       |                           |
|----------------------------------------------------------------------------------------------------------------------------------------------------------------------------------------------------------|------|-------------------------------------------------------------------------------------------------------------------------------------------------------------------------------------------------------|---------------------------|
| Ng, T. P.; Ling, L. H. A.; Nyunt, M. S. Z.; Feng, L.; Niti, M.; Tan, B. Y.; Chan, G.; Khoo, S. A.; Chan, S. M.; Yap, P.; Yap, K. B.                                                                      | 2018 | Cognitive Effects of Multi-Domain Interventions Among Pre-Frail and Frail Community-Living Older Persons: Randomized Controlled Trial                                                                 | Intervention not eligible |
| Rand, D.; Eng, J. J.; Liu-Ambrose, T.; Tawashy, A. E.                                                                                                                                                    | 2010 | Feasibility of a 6-month exercise and recreation program to improve executive functioning and memory in individuals with chronic stroke                                                               | Intervention not eligible |
| Kim, M. J.; Han, C. W.; Min, K. Y.; Cho, C. Y.; Lee, C. W.; Ogawa, Y.; Mori, E.; Kohzuki, M.                                                                                                             | 2016 | Physical Exercise with Multicomponent Cognitive Intervention for Older Adults with Alzheimer's Disease: A 6-Month Randomized Controlled Trial                                                         | Intervention not eligible |
| Mastel-Smith, B.; Duke, G.; He, Z.                                                                                                                                                                       | 2019 | A Pilot Randomized Controlled Trial Examining the Effects of Tai Chi and Electronic Tablet Use on Older Adults' Cognition and Health                                                                  | Intervention not eligible |
| Matz-Costa, C.; Lubben, J.; Lachman, M. E.; Lee, H.; Choi, Y. J.                                                                                                                                         | 2018 | A Pilot Randomized Trial of an Intervention to Enhance the Health-Promoting Effects of Older Adults' Activity Portfolios: The Engaged4Life Program                                                    | Intervention not eligible |
| McEwen, S. C.; Siddarth, P.; Abedelsater, B.; Kim, Y.; Mui, W.; Wu, P.; Emerson, N. D.; Lee, J.; Greenberg, S.; Shelton, T.; Kaiser, S.; Small, G. W.; Merrill, D. A.                                    | 2018 | Simultaneous Aerobic Exercise and Memory Training Program in Older Adults with Subjective Memory Impairments                                                                                          | Intervention not eligible |
| Giuli, C.; Papa, R.; Lattanzio, F.; Postacchini, D.                                                                                                                                                      | 2016 | The Effects of Cognitive Training for Elderly: Results from My Mind Project                                                                                                                           | Intervention not eligible |
| Taheri, M.; Irandoust, K.                                                                                                                                                                                | 2017 | The effect of balance exercises and computerized cognitive training on psychomotor performance in elderly                                                                                             | Intervention not eligible |
| Lam, L. C. W.; Chan, W. C.; Leung, T.; Fung, A. W. T.; Leung, E. M. F.                                                                                                                                   | 2015 | Would older adults with mild cognitive impairment adhere to and benefit from a structured lifestyle activity intervention to enhance cognition?: A cluster randomized controlled trial                | Intervention not eligible |
| Yoon, J. E.; Lee, S. M.; Lim, H. S.; Kim, T. H.; Jeon, J. K.; Mun, M. H.                                                                                                                                 | 2013 | The effects of cognitive activity combined with active extremity exercise on balance, walking activity, memory level and quality of life of an older adult sample with dementia                       | Intervention not eligible |
| Zheng, Z.; Zhu, X.; Yin, S.; Wang, B.; Niu, Y.; Huang, X.; Li, R.; Li, J.                                                                                                                                | 2015 | Combined cognitive-psychological-physical intervention induces reorganization of intrinsic functional brain architecture in older adults                                                              | Intervention not eligible |
| Voelcker-Rehage, C.; Godde, B.; Staudinger, U. M.                                                                                                                                                        | 2011 | Cardiovascular and coordination training differentially improve cognitive performance and neural processing in older adults                                                                           | Intervention not eligible |
| Vieira, A.; Melo, C.; Machado, J.; Gabriel, J.                                                                                                                                                           | 2018 | Virtual reality exercise on a home-based phase III cardiac rehabilitation program, effect on executive function, quality of life and depression, anxiety and stress: a randomized controlled trial    | Intervention not eligible |
| Van Schaik, P.; Blake, J.; Pernet, F.; Spears, I.; Fencott, C.                                                                                                                                           | 2008 | Virtual augmented exercise gaming for older adults                                                                                                                                                    | Intervention not eligible |
| Fraser, S. A.; Li, K. Z. H.; Berryman, N.; Desjardins-Crepeau, L.; Lussier, M.; Vadaga, K.; Lehr, L.; Vu, T. T. M.; Bosquet, L.; Bherer, L.                                                              | 2017 | Does combined physical and cognitive training improve dual-task balance and gait outcomes in sedentary older adults?                                                                                  | Intervention not eligible |
| Fogarty, J. N.; Murphy, K. J.; McFarlane, B.; Montero-Odasso, M.; Wells, J.; Troyer, A. K.; Trinh, D.; Gutmanis, I.; Hansen, K. T.                                                                       | 2016 | Taoist Tai Chi and Memory Intervention for Individuals with Mild Cognitive Impairment                                                                                                                 | Intervention not eligible |
| Fabre, C.; Masse-Biron, J.; Chamari, K.; Varray, A.; Mucci, P.; Prefaut, C.                                                                                                                              | 1999 | Evaluation of quality of life in elderly healthy subjects after aerobic and/or mental training                                                                                                        | Intervention not eligible |
| Evers, A.; Klusmann, V.; Schwarzer, R.; Heuser, I.                                                                                                                                                       | 2011 | Improving cognition by adherence to physical or mental exercise: a moderated mediation analysis                                                                                                       | Intervention not eligible |
| Espeland, M. A.; Lipska, K.; Miller, M. E.; Rushing, J.; Cohen, R. A.; Vergheze, J.; McDermott, M. M.; King, A. C.; Strotmeyer, E. S.; Blair, S. N.; Pahor, M.; Reid, K.; Demons, J.; Kritchevsky, S. B. | 2017 | Effects of Physical Activity Intervention on Physical and Cognitive Function in Sedentary Adults With and Without Diabetes                                                                            | Intervention not eligible |
| Esmail, A.; Vrinceanu, T.; Lussier, M.; Predovan, D.; Berryman, N.; Houle, J.; Karelis, A.; Grenier, S.; Minh Vu, T. T.; Villalpando, J. M.; Bherer, L.                                                  | 2019 | Effects of Dance/Movement Training vs. Aerobic Exercise Training on cognition, physical fitness and quality of life in older adults: A randomized controlled trial                                    | Intervention not eligible |
| Dimitrova, J.; Hogan, M.; Khader, P.; O'Hara, D.; Kilmartin, L.; Walsh, J. C.; Roche, R.; Anderson-Hanley, C.                                                                                            | 2017 | Comparing the effects of an acute bout of physical exercise with an acute bout of interactive mental and physical exercise on electrophysiology and executive functioning in younger and older adults | Intervention not eligible |
| Dechamps, A.; Onifade, C.; Decamps, A.; Bourdel-Marchasson, I.                                                                                                                                           | 2009 | Health-related quality of life in frail institutionalized elderly: Effects of a cognition-action intervention and tai chi                                                                             | Intervention not eligible |
| de Oliveira Silva, F.; Ferreira, J. V.; Placido, J.; Sant'Anna, P.; Araujo, J.; Marinho, V.;                                                                                                             | 2019 | Three months of multimodal training contributes to mobility and executive function in elderly individuals with mild cognitive                                                                         | Intervention not eligible |

|                                                                                                                                                                                                                   |      |                                                                                                                                                                                                          |                           |
|-------------------------------------------------------------------------------------------------------------------------------------------------------------------------------------------------------------------|------|----------------------------------------------------------------------------------------------------------------------------------------------------------------------------------------------------------|---------------------------|
| Laks, J.; Camaz Deslandes, A.                                                                                                                                                                                     |      | impairment, but not in those with Alzheimer's disease: A randomized controlled trial                                                                                                                     |                           |
| Coetsee, C.; Terblanche, E.                                                                                                                                                                                       | 2017 | The effect of three different exercise training modalities on cognitive and physical function in a healthy older population                                                                              | Intervention not eligible |
| Choi, W.; Lee, S.                                                                                                                                                                                                 | 2019 | The Effects of Virtual Kayak Paddling Exercise on Postural Balance, Muscle Performance, and Cognitive Function in Older Adults with Mild Cognitive Impairment: A Randomized Controlled Trial             | Intervention not eligible |
| Chapman, S. B.; Aslan, S.; Spence, J. S.; DeFina, L. F.; Keebler, M. W.; Didehbani, N.; Lu, H.                                                                                                                    | 2013 | Shorter term aerobic exercise improves brain, cognition, and cardiovascular fitness in aging                                                                                                             | Intervention not eligible |
| Cassilhas, R. C.; Viana, V. A. R.; Grassmann, V.; Santos, R. T.; Santos, R. F.; Tufik, S.; Mello, M. T.                                                                                                           | 2007 | The impact of resistance exercise on the cognitive function of the elderly                                                                                                                               | Intervention not eligible |
| Candela, Filippo; Zucchetti, Giulia; Magistro, Daniele; Rabaglietti, Emanuela                                                                                                                                     | 2015 | The effects of a physical activity program and a cognitive training program on the long-term memory and selective attention of older adults: A comparative study                                         | Intervention not eligible |
| Burgener, S. C.; Yang, Y.; Gilbert, R.; Marsh-Yant, S.                                                                                                                                                            | 2008 | The effects of a multimodal intervention on outcomes of persons with early-stage dementia                                                                                                                | Intervention not eligible |
| Cherup, N.; Roberson, K.; Potiaumpai, M.; Widdowson, K.; Jaghab, A. M.; Chowdhari, S.; Armitage, C.; Seely, A.; Signorile, J.                                                                                     | 2018 | Improvements in cognition and associations with measures of aerobic fitness and muscular power following structured exercise                                                                             | Intervention not eligible |
| Cheng, Y.; Wu, W.; Feng, W.; Wang, J.; Chen, Y.; Shen, Y.; Li, Q.; Zhang, X.; Li, C.                                                                                                                              | 2012 | The effects of multi-domain versus single-domain cognitive training in non-demented older people: A randomized controlled trial                                                                          | Intervention not eligible |
| Chapman, S. B.; Aslan, S.; Spence, J. S.; Keebler, M. W.; DeFina, L. F.; Didehbani, N.; Perez, A. M.; Lu, H.; D'Esposito, M.                                                                                      | 2016 | Distinct brain and behavioral benefits from cognitive vs. Physical training: A randomized trial in aging adults                                                                                          | Intervention not eligible |
| Byun, J. E.; Kang, E. B.                                                                                                                                                                                          | 2016 | The effects of senior brain health exercise program on basic physical fitness, cognitive function and BDNF of elderly women - a feasibility study                                                        | Intervention not eligible |
| Brummel, N. E.; Girard, T. D.; Ely, E. W.; Pandharipande, P. P.; Morandi, A.; Hughes, C. G.; Graves, A. J.; Shintani, A.; Murphy, E.; Work, B.; Pun, B. T.; Boehm, L.; Gill, T. M.; Dittus, R. S.; Jackson, J. C. | 2014 | Feasibility and safety of early combined cognitive and physical therapy for critically ill medical and surgical patients: The Activity and Cognitive Therapy in ICU (ACT-ICU) trial                      | Intervention not eligible |
| Callisaya, M. L.; Daly, R. M.; Sharman, J. E.; Bruce, D.; Davis, T. M. E.; Greenaway, T.; Nolan, M.; Beare, R.; Schultz, M. G.; Phan, T.; Blizzard, L. C.; Srikanth, V. K.                                        | 2017 | Feasibility of a multi-modal exercise program on cognition in older adults with Type 2 diabetes - a pilot randomised controlled trial                                                                    | Intervention not eligible |
| Bossers, W. J. R.; Scherder, E. J. A.; Boersma, F.; Hortobagyi, T.; Van Der Woude, L. H. V.; Van Heuvelen, M. J. G.                                                                                               | 2014 | Feasibility of a combined aerobic and strength training program and its effects on cognitive and physical function in institutionalized dementia patients. A pilot study                                 | Intervention not eligible |
| Bherer, L.; Languard, A.; Kaushal, N.; Vrinceanu, T.; Desjardins-Crepeau, L.; Langlois, F.; Kramer, A. F.                                                                                                         | 2019 | Physical exercise training effect and mediation through cardiorespiratory fitness on dual-task performances differ in younger-old and older-old adults                                                   | Intervention not eligible |
| Berryman, N.; Bherer, L.; Nadeau, S.; Lauziere, S.; Lehr, L.; Bobeuf, F.; Lussier, M.; Kergoat, M. J.; Vu, T. T. M.; Bosquet, L.                                                                                  | 2014 | Multiple roads lead to Rome: combined high-intensity aerobic and strength training vs. gross motor activities leads to equivalent improvement in executive functions in a cohort of healthy older adults | Intervention not eligible |
| Baumeister, J.; Ssin, S. Y.; ElSayed, N. A. M.; Dorrian, J.; Webb, D. P.; Walsh, J. A.; Simon, T. M.; Irlitti, A.; Smith, R. T.; Kohler, M.; Thomas, B. H.                                                        | 2017 | Cognitive Cost of Using Augmented Reality Displays                                                                                                                                                       | Intervention not eligible |
| Baniqued, P. L.; Gallen, C. L.; Voss, M. W.; Burzynska, A. Z.; Wong, C. N.; Cooke, G. E.; Duffy, K.; Fanning, J.; Ehlers, D. K.; Salerno, E. A.; Aguinaga, S.; McAuley, E.; Kramer, A. F.; D'Esposito, M.         | 2018 | Brain network modularity predicts exercise-related executive function gains in older adults                                                                                                              | Intervention not eligible |
| Anonymous,                                                                                                                                                                                                        | 2019 | Erratum: Simultaneous aerobic exercise and memory training program in older adults with subjective memory impairments (Journal of Alzheimer's Disease (2018) 62:2 (795-806) DOI: 10.3233/JAD-170846)     | Intervention not eligible |
| Anonymous,                                                                                                                                                                                                        | 2019 | Simultaneous Aerobic Exercise and Memory Training Program in Older Adults with Subjective Memory Impairments                                                                                             | Intervention not eligible |
| Solomon, A.; Turunen, H.; Ngandu, T.; Peltonen, M.; Levalahti, E.; Helisalmi, S.; Antikainen, R.; Backman, L.; Hanninen, T.; Jula, A.; Laatikainen, T.; Lehtisalo, J.;                                            | 2018 | Effect of the apolipoprotein e genotype on cognitive change during a multidomain lifestyle intervention a subgroup analysis of a randomized clinical trial                                               | Intervention not eligible |

|                                                                                                                                                                                                                          |      |                                                                                                                                                                                                                                 |                           |
|--------------------------------------------------------------------------------------------------------------------------------------------------------------------------------------------------------------------------|------|---------------------------------------------------------------------------------------------------------------------------------------------------------------------------------------------------------------------------------|---------------------------|
| Lindstrom, J.; Paajanen, T.; Pajala, S.; Stigsdotter-Neely, A.; Strandberg, T.; Tuomilehto, J.; Soininen, H.; Kivipelto, M.                                                                                              |      |                                                                                                                                                                                                                                 |                           |
| Falkenstein, M.; Gajewski, P. D.                                                                                                                                                                                         | 2013 | The Influence of Different Training Regimes on Executive Functions and Brain Activity in Healthy Old Adults                                                                                                                     | Intervention not eligible |
| Kulmala, J.; Ngandu, T.; Havulinna, S.; Levalahti, E.; Lehtisalo, J.; Solomon, A.; Antikainen, R.; Laatikainen, T.; Pippola, P.; Peltonen, M.; Rauramaa, R.; Soininen, H.; Strandberg, T.; Tuomilehto, J.; Kivipelto, M. | 2019 | The Effect of Multidomain Lifestyle Intervention on Daily Functioning in Older People                                                                                                                                           | Intervention not eligible |
| Kwok, Yan Yan                                                                                                                                                                                                            | 2019 | The effects of mindfulness yoga versus stretching and resistance training exercises on psychological distress for people with mild-to-moderate Parkinson's disease: A randomised controlled trial                               | Intervention not eligible |
| Kao, C. C.; Chiu, H. L.; Liu, D.; Chan, P. T.; Tseng, I. J.; Chen, R.; Niu, S. F.; Chou, K. R.                                                                                                                           | 2018 | Effect of interactive cognitive motor training on gait and balance among older adults: A randomized controlled trial                                                                                                            | Intervention not eligible |
| Maltais, M.; de Souto Barreto, P.; Pothier, K.; Cantet, C.; Andrieu, S.; Rolland, Y.; Vellas, B.                                                                                                                         | 2019 | Lifestyle multidomain intervention, omega-3 supplementation, or both for reducing the risk of developing clinically relevant depressive symptoms in older adults with memory complaints? Secondary analysis from the MAPT trial | Intervention not eligible |
| Marengoni, A.; Rizzuto, D.; Fratiglioni, L.; Antikainen, R.; Laatikainen, T.; Lehtisalo, J.; Peltonen, M.; Soininen, H.; Strandberg, T.; Tuomilehto, J.; Kivipelto, M.; Ngandu, T.                                       | 2018 | The Effect of a 2-Year Intervention Consisting of Diet, Physical Exercise, Cognitive Training, and Monitoring of Vascular Risk on Chronic Morbidity-the FINGER Randomized Controlled Trial                                      | Intervention not eligible |
| Wollesen, B.; Voelcker-Rehage, C.; Willer, J.; Zech, A.; Mattes, K.                                                                                                                                                      | 2015 | Feasibility study of dual-task-managing training to improve gait performance of older adults                                                                                                                                    | Intervention not eligible |
| Maselli, M.; Fiorini, L.; Cecchi, F.; Castro, E.; Esposito, R.; Cavallo, F.; Mancioffi, G.; Ottino, S.; Pinori, F.; Sportiello, M. T.; Laschi, C.                                                                        | 2018 | Can physical and cognitive training based on episodic memory be combined in a new protocol for daily training?                                                                                                                  | Intervention not eligible |
| Falbo, S.; Condello, G.; Capranica, L.; Forte, R.; Pesce, C.                                                                                                                                                             | 2016 | Effects of Physical-Cognitive Dual Task Training on Executive Function and Gait Performance in Older Adults: A Randomized Controlled Trial                                                                                      | Intervention not eligible |
| You, J. H.; Shetty, A.; Jones, T.; Shields, K.; Belay, Y.; Brown, D.                                                                                                                                                     | 2009 | Effects of dual-task cognitive-gait intervention on memory and gait dynamics in older adults with a history of falls: A preliminary investigation                                                                               | Outcome not eligible      |
| de Bruin, E. D.; van Het Reve, E.; Murer, K.                                                                                                                                                                             | 2013 | A randomized controlled pilot study assessing the feasibility of combined motor-cognitive training and its effect on gait characteristics in the elderly                                                                        | Outcome not eligible      |
| Khan, K.; Ghous, M.; Malik, A. N.; Amjad, M. I.; Tariq, I.                                                                                                                                                               | 2018 | Effects of turning and cognitive training in fall prevention with dual task training in elderly with balance impairment                                                                                                         | Outcome not eligible      |
| Jehu, D. A.; Paquet, N.; Lajoie, Y.                                                                                                                                                                                      | 2017 | Balance and mobility training with or without concurrent cognitive training improves the timed up and go (TUG), TUG cognitive, and TUG manual in healthy older adults: an exploratory study                                     | Outcome not eligible      |
| Yang, Y. R.; Cheng, S. J.; Lee, Y. J.; Liu, Y. C.; Wang, R. Y.                                                                                                                                                           | 2019 | Cognitive and motor dual task gait training exerted specific training effects on dual task gait performance in individuals with Parkinson's disease: A randomized controlled pilot study                                        | Outcome not eligible      |
| Jehu, D.; Paquet, N.; Lajoie, Y.                                                                                                                                                                                         | 2017 | Balance and mobility training with or without concurrent cognitive training does not improve posture, but improves reaction time in healthy older adults                                                                        | Outcome not eligible      |
| Werner, C.; Rosner, R.; Wiloth, S.; Lemke, N. C.; Bauer, J. M.; Hauer, K.                                                                                                                                                | 2018 | Time course of changes in motor-cognitive exergame performances during task-specific training in patients with dementia: Identification and predictors of early training response                                               | Outcome not eligible      |
| Wongcharoen, S.; Sungkarat, S.; Munkhetvit, P.; Lugade, V.; Silsupadol, P.                                                                                                                                               | 2017 | Home-based interventions improve trained, but not novel, dual-task balance performance in older adults: A randomized controlled trial                                                                                           | Outcome not eligible      |
| Pichierri, G.; Murer, K.; de Bruin, E. D.                                                                                                                                                                                | 2012 | A cognitive-motor intervention using a dance video game to enhance foot placement accuracy and gait under dual task conditions in older adults: a randomized controlled trial                                                   | Outcome not eligible      |
| Lemke, N. C.; Werner, C.; Wiloth, S.; Oster, P.; Bauer, J. M.; Hauer, K.                                                                                                                                                 | 2019 | Transferability and Sustainability of Motor-Cognitive Dual-Task Training in Patients with Dementia: A Randomized Controlled Trial                                                                                               | Outcome not eligible      |
| Wiloth, S.; Werner, C.; Lemke, N. C.; Bauer, J.; Hauer, K.                                                                                                                                                               | 2018 | Motor-cognitive effects of a computerized game-based training method in people with dementia: a randomized controlled trial                                                                                                     | Outcome not eligible      |
| Grasso, M. G.; Broccoli, M.; Casillo, P.; Catani, S.; Pace, L.; Pompa, A.; Rizzi, F.; Troisi, E.                                                                                                                         | 2017 | Evaluation of the Impact of Cognitive Training on Quality of Life in Patients with Multiple Sclerosis                                                                                                                           | Population not eligible   |

|                                                                                                                                                                                                                                                                                                      |      |                                                                                                                                                                                                                          |                         |
|------------------------------------------------------------------------------------------------------------------------------------------------------------------------------------------------------------------------------------------------------------------------------------------------------|------|--------------------------------------------------------------------------------------------------------------------------------------------------------------------------------------------------------------------------|-------------------------|
| Prasertsakul, T.; Kaimuk, P.; Chinjenpradit, W.; Limroongreungrat, W.; Charoensuk, W.                                                                                                                                                                                                                | 2018 | The effect of virtual reality-based balance training on motor learning and postural control in healthy adults: a randomized preliminary study                                                                            | Population not eligible |
| Ploughman, M.; Eskes, G. A.; Kelly, L. P.; Kirkland, M. C.; Devasahayam, A. J.; Wallack, E. M.; Abraha, B.; Hasan, S. M. M.; Downer, M. B.; Keeler, L.; Wilson, G.; Skene, E.; Sharma, I.; Chaves, A. R.; Curtis, M. E.; Bedford, E.; Robertson, G. S.; Moore, C. S.; McCarthy, J.; Mackay-Lyons, M. | 2019 | Synergistic Benefits of Combined Aerobic and Cognitive Training on Fluid Intelligence and the Role of IGF-1 in Chronic Stroke                                                                                            | Population not eligible |
| Meester, D.; Al-Yahya, E.; Dennis, A.; Collett, J.; Wade, D. T.; Ovington, M.; Liu, F.; Meaney, A.; Cockburn, J.; Johansen-Berg, H.; Dawes, H.                                                                                                                                                       | 2019 | A randomized controlled trial of a walking training with simultaneous cognitive demand (dual-task) in chronic stroke                                                                                                     | Population not eligible |
| Bo, W.; Lei, M.; Tao, S.; Jie, L. T.; Qian, L.; Lin, F. Q.; Ping, W. X.                                                                                                                                                                                                                              | 2019 | Effects of combined intervention of physical exercise and cognitive training on cognitive function in stroke survivors with vascular cognitive impairment: a randomized controlled trial                                 | Population not eligible |
| Park, M. O.; Lee, S. H.                                                                                                                                                                                                                                                                              | 2018 | Effects of cognitive-motor dual-Task training combined with auditory motor synchronization training on cognitive functioning in individuals with chronic stroke                                                          | Population not eligible |
| Heisz, J. J.; Clark, I. B.; Bonin, K.; Paolucci, E. M.; Michalski, B.; Becker, S.; Fahnestock, M.                                                                                                                                                                                                    | 2017 | The effects of physical exercise and cognitive training on memory and neurotrophic factors                                                                                                                               | Population not eligible |
| Kimhy, D.; Vakhrusheva, J.; Bartels, M. N.; Armstrong, H. F.; Ballon, J. S.; Khan, S.; Chang, R. W.; Hansen, M. C.; Ayanruoh, L.; Lister, A.; Castren, E.; Smith, E. E.; Sloan, R. P.                                                                                                                | 2015 | The impact of aerobic exercise on brain-derived neurotrophic factor and neurocognition in individuals with schizophrenia: A single-blind, randomized clinical trial                                                      | Population not eligible |
| Niederer, D.; Engeroff, T.; Wallner, F.; Plaumann, U.; Banzer, W.                                                                                                                                                                                                                                    | 2018 | The acute physical and cognitive effects of a classical workplace physical activity program versus a motor-cognitive coordination workplace program: A randomized crossover trial                                        | Population not eligible |
| O'Leary, K. C.; Pontifex, M. B.; Scudder, M. R.; Brown, M. L.; Hillman, C. H.                                                                                                                                                                                                                        | 2011 | The effects of single bouts of aerobic exercise, exergaming, and videogame play on cognitive control                                                                                                                     | Population not eligible |
| Janssen, A.; Boster, A.; Lee, H.; Patterson, B.; Prakash, R. S.                                                                                                                                                                                                                                      | 2015 | The effects of video-game training on broad cognitive transfer in multiple sclerosis: A pilot randomized controlled trial                                                                                                | Population not eligible |
| Gillman, A. S.; Bryan, A. D.                                                                                                                                                                                                                                                                         | 2016 | Effects of Performance Versus Game-Based Mobile Applications on Response to Exercise                                                                                                                                     | Population not eligible |
| Yeh, T. T.; Chang, K. C.; Wu, C. Y.                                                                                                                                                                                                                                                                  | 2019 | The Active Ingredient of Cognitive Restoration: A Multicenter Randomized Controlled Trial of Sequential Combination of Aerobic Exercise and Computer-Based Cognitive Training in Stroke Survivors With Cognitive Decline | Population not eligible |
| Woost, L.; Bazin, P. L.; Taubert, M.; Trampel, R.; Tardif, C. L.; Garthe, A.; Kempermann, G.; Renner, U.; Stalla, G.; Ott, D. V. M.; Rjosk, V.; Obrig, H.; Villringer, A.; Roggenhofer, E.; Klein, T. A.                                                                                             | 2018 | Physical Exercise and Spatial Training: A Longitudinal Study of Effects on Cognition, Growth Factors, and Hippocampal Plasticity                                                                                         | Population not eligible |
| Wilczynska, M.; Lubans, D. R.; Paolini, S.; Plotnikoff, R. C.                                                                                                                                                                                                                                        | 2019 | Mediating Effects of the 'eCoFit' Physical Activity Intervention for Adults at Risk of, or Diagnosed with, Type 2 Diabetes                                                                                               | Population not eligible |
| Vogt, T.; Herpers, R.; Scherfgen, D.; Struder, H. K.; Schneider, S.                                                                                                                                                                                                                                  | 2015 | Neuroelectric adaptations to cognitive processing in virtual environments: an exercise-related approach                                                                                                                  | Population not eligible |
| Veldkamp, R.; Baert, I.; Kalron, A.; Tacchino, A.; D'Hooge, M.; Hellinckx, P.; Van Zeir, E.; De Weerd, N.; Raats, J.; Van Geel, F.; Feys, P.                                                                                                                                                         | 2019 | Dual task training in persons with Multiple Sclerosis: Effectiveness of an integrated cognitive-motor dual task training compared to a single mobility training                                                          | Population not eligible |
| Schaeffer, E.; Busch, J. H.; Roeben, B.; Otterbein, S.; Saraykin, P.; Leks, E.; Liepelt-Scarfone, I.; Synofzik, M.; Elshehabi, M.; Maetzler, W.; Hansen, C.; Andris, S.; Berg, D.                                                                                                                    | 2019 | Effects of Exergaming on Attentional Deficits and Dual-Tasking in Parkinson's Disease                                                                                                                                    | Population not eligible |
| Felippe, L. A.; Salgado, P. R.; de Souza Silvestre, D.; Smaili, S. M.; Christofoletti, G.                                                                                                                                                                                                            | 2019 | A Controlled Clinical Trial on the Effects of Exercise on Cognition and Mobility in Adults With Multiple Sclerosis                                                                                                       | Population not eligible |
| Anonymous,                                                                                                                                                                                                                                                                                           | 2003 | Maintaining cognition in the elderly                                                                                                                                                                                     | Not RCT                 |
| Taylor, L.; Kerse, N.; Klenk, J.; Borotkanics, R.; Maddison, R.                                                                                                                                                                                                                                      | 2018 | Exergames to Improve the Mobility of Long-Term Care Residents: A Cluster Randomized Controlled Trial                                                                                                                     | Not RCT                 |
| Reinthal, A.; Szirony, K.; Clark, C.; Swiers, J.; Kellicker, M.; Linder, S.                                                                                                                                                                                                                          | 2012 | ENGAGE: Guided activity-based gaming in neurorehabilitation after stroke: A pilot study                                                                                                                                  | Not RCT                 |
| Tay, L.; Lim, W. S.; Chan, M.; Ali, N.;                                                                                                                                                                                                                                                              | 2016 | A Combined Cognitive Stimulation and Physical Exercise                                                                                                                                                                   | Not RCT                 |

|                                                                                                                                                                                                                                                                |      |                                                                                                                                                                                                  |         |
|----------------------------------------------------------------------------------------------------------------------------------------------------------------------------------------------------------------------------------------------------------------|------|--------------------------------------------------------------------------------------------------------------------------------------------------------------------------------------------------|---------|
| Chong, M. S.                                                                                                                                                                                                                                                   |      | Programme (MINDVital) in Early Dementia: Differential Effects on Single- and Dual-Task Gait Performance                                                                                          |         |
| Gregory, M. A.; Boa Sorte Silva, N. C.; Gill, D. P.; McGowan, C. L.; Liu-Ambrose, T.; Shoemaker, J. K.; Hachinski, V.; Holmes, J.; Petrella, R. J.                                                                                                             | 2017 | Combined Dual-Task Gait Training and Aerobic Exercise to Improve Cognition, Mobility, and Vascular Health in Community-Dwelling Older Adults at Risk for Future Cognitive Decline1               | Not RCT |
| Brami, C.; Trivalle, C.; Maillot, P.                                                                                                                                                                                                                           | 2018 | Feasibility and interest of exergame training for Alzheimer patients in long-term care                                                                                                           | Not RCT |
| Chuang, L. Y.; Hung, H. Y.; Huang, C. J.; Chang, Y. K.; Hung, T. M.                                                                                                                                                                                            | 2015 | A 3-month intervention of Dance Dance Revolution improves interference control in elderly females: a preliminary investigation                                                                   | Not RCT |
| Arkin, S.                                                                                                                                                                                                                                                      | 2007 | Language-enriched exercise plus socialization slows cognitive decline in Alzheimer's disease                                                                                                     | Not RCT |
| Kayama, H.; Okamoto, K.; Nishiguchi, S.; Yukutake, T.; Tanigawa, T.; Nagai, K.; Yamada, M.; Aoyama, T.                                                                                                                                                         | 2013 | Efficacy of an Exercise Game Based on Kinect in Improving Physical Performances of Fall Risk Factors in Community-Dwelling Older Adults                                                          | Not RCT |
| Vallabhajosula, S.; McMillion, A. K.; Freund, J. E.                                                                                                                                                                                                            | 2017 | The effects of exergaming and treadmill training on gait, balance, and cognition in a person with Parkinson's disease: A case study                                                              | Not RCT |
| Taniguchij, Y.; Kousa, Y.; Shinkai, S.; Uematsuj, S.; Nagasawa, A.; Aoki, M.; Muto, S. Y.; Abe, M.; Fukaya, T.; Watanabe, N.                                                                                                                                   | 2009 | Increased physical and intellectual activity and changes in cognitive function in elderly dwellers: lessons from a community-based dementia prevention trial in Sugunami Ward, Tokyo. [Japanese] | Not RCT |
| Tang, J. Y. M.; Wong, G. H. Y.; Luo, H.; Liu, T.; Lum, T. Y. S.                                                                                                                                                                                                | 2019 | Cognitive changes associated with mentally active lifestyle and structured cognitive programs: a 2-year longitudinal study                                                                       | Not RCT |
| Sun, Jing; Zhang, Ning; Buys, Nicholas; Zhou, Zheng-Yuan; Shen, Shu-Ying; Yuan, Bao-Jun                                                                                                                                                                        | 2013 | The role of Tai Chi, cultural dancing, playing a musical instrument and singing in the prevention of chronic disease in Chinese older adults: A mind-body meditative approach                    | Not RCT |
| Styliadis, C.; Kartsidis, P.; Paraskevopoulos, E.; Ioannides, A. A.; Bamidis, P. D.                                                                                                                                                                            | 2015 | Neuroplastic effects of combined computerized physical and cognitive training in elderly individuals at risk for dementia: An eLORETA controlled study on resting states                         | Not RCT |
| Thiel, C.; Vogt, L.; Tesky, V. A.; Meroth, L.; Jakob, M.; Sahlender, S.; Pantel, J.; Banzer, W.                                                                                                                                                                | 2012 | Cognitive intervention response is related to habitual physical activity in older adults                                                                                                         | Not RCT |
| Streber, A.; Abu-Omar, K.; Hentschke, C.; Rutten, A.                                                                                                                                                                                                           | 2017 | A multicenter controlled study for dementia prevention through physical, cognitive and social activities - GESTALT-kompakt                                                                       | Not RCT |
| Theill, N.; Schumacher, V.; Adelsberger, R.; Martin, M.; Jancke, L.                                                                                                                                                                                            | 2013 | Effects of simultaneously performed cognitive and physical training in older adults                                                                                                              | Not RCT |
| Smart, C. M.; Karr, J. E.; Areshenkoff, C.; Rabin, L.; Hudon, C.; Ali, J. I.; Arenaza-Urquijo, E. M.; Buckley, R. F.; Chetelat, G.; Gates, N.; Hampel, H.; Jessen, F.; Marchant, N. L.; Sikkes, S. A. M.; Tales, A.; Van Der Flier, W. M.; Wesselman, L.       | 2016 | Impact of non-pharmacologic interventions on cognitive, behavioral, and emotional functioning in older adults with subjective cognitive decline: A systematic review of controlled trials        | Not RCT |
| Smart, C. M.; Karr, J. E.; Areshenkoff, C. N.; Rabin, L. A.; Hudon, C.; Gates, N.; Ali, J. I.; Arenaza-Urquijo, E. M.; Buckley, R. F.; Chetelat, G.; Hampel, H.; Jessen, F.; Marchant, N. L.; Sikkes, S. A. M.; Tales, A.; van der Flier, W. M.; Wesselman, L. | 2017 | Non-Pharmacologic Interventions for Older Adults with Subjective Cognitive Decline: Systematic Review, Meta-Analysis, and Preliminary Recommendations                                            | Not RCT |
| Thomas, Karen S.; Hicks, Julia J.; Johnson, Otis A.                                                                                                                                                                                                            | 1994 | A pilot project for group cognitive retraining with elderly stroke patients                                                                                                                      | Not RCT |
| Unibaso-Markaida, I.; Iraurgi, I.; Ortiz-Marques, N.; Amayra, I.; Martinez-Rodriguez, S.                                                                                                                                                                       | 2019 | Effect of the Wii Sports Resort on the improvement in attention, processing speed and working memory in moderate stroke 17 Psychology and Cognitive Sciences 1701 Psychology                     | Not RCT |
| Dannhauser, T. M.; Cleverley, M.; Whitfield, T. J.; Fletcher, B. C.; Stevens, T.; Walker, Z.                                                                                                                                                                   | 2014 | A complex multimodal activity intervention to reduce the risk of dementia in mild cognitive impairment--ThinkingFit: pilot and feasibility study for a randomized controlled trial               | Not RCT |
| Regan, K.; White, F.; Harvey, D.; Middleton, L. E.                                                                                                                                                                                                             | 2019 | Effects of an Exercise and Mental Activity Program for People With Dementia and Their Care Partners                                                                                              | Not RCT |
| Rahe, J.; Petrelli, A.; Kaesberg, S.; Fink, G. R.; Kessler, J.; Kalbe, E.                                                                                                                                                                                      | 2015 | Effects of cognitive training with additional physical activity compared to pure cognitive training in healthy older adults                                                                      | Not RCT |
| Lamoth, C. J.; Alingh, R.; Caljouw, S. R.                                                                                                                                                                                                                      | 2012 | Exergaming for elderly: effects of different types of game feedback on performance of a balance task                                                                                             | Not RCT |
| Sanders, L. M. J.; Hortobagyi, T.; Gemert, S. L. B. V.; Van Der Zee, E. A.; Van Heuvelen, M. J. G.                                                                                                                                                             | 2019 | Dose-response relationship between exercise and cognitive function in older adults with and without cognitive impairment: A systematic review and meta-analysis                                  | Not RCT |
| Santos, G. D.; Nunes, P. V.; Stella, F.; Brum, P. S.; Yassuda, M. S.; Ueno, L. M.;                                                                                                                                                                             | 2015 | Multidisciplinary rehabilitation program: Effects of a multimodal intervention for patients with Alzheimer's disease and cognitive                                                               | Not RCT |



|                                                                                                                                                                                                                                                                              |      |                                                                                                                                                                                          |         |
|------------------------------------------------------------------------------------------------------------------------------------------------------------------------------------------------------------------------------------------------------------------------------|------|------------------------------------------------------------------------------------------------------------------------------------------------------------------------------------------|---------|
| Gattaz, W. F.; Forlenza, O. V.                                                                                                                                                                                                                                               |      | impairment without dementia                                                                                                                                                              |         |
| Kayama, H.; Okamoto, K.; Nishiguchi, S.; Yamada, M.; Kuroda, T.; Aoyama, T.                                                                                                                                                                                                  | 2014 | Effect of a Kinect-based exercise game on improving executive cognitive performance in community-dwelling elderly: case control study                                                    | Not RCT |
| Kim, H. H.; Jung, N. H.                                                                                                                                                                                                                                                      | 2018 | The effect of exercise combined with a cognitive-enhancement group training program on cognition and depression in the community-dwelling elderly                                        | Not RCT |
| Hsieh, C. C.; Lin, P. S.; Wei, Y. T.; Huang, Y. C.                                                                                                                                                                                                                           | 2015 | Tai chi-based exergaming program for older adults at risk of cognitive impairment                                                                                                        | Not RCT |
| Gates, N. J.; Vernooij, R. W. M.; Nisio, M. D.; Karim, S.; March, E.; Martinez, G.; Rutjes, A. W. S.                                                                                                                                                                         | 2019 | Computerised cognitive training for preventing dementia in people with mild cognitive impairment                                                                                         | Not RCT |
| Killane, I.; Fearon, C.; Newman, L.; McDonnell, C.; Waechter, S. M.; Sons, K.; Lynch, T.; Reilly, R. B.                                                                                                                                                                      | 2015 | Dual Motor-Cognitive Virtual Reality Training Impacts Dual-Task Performance in Freezing of Gait                                                                                          | Not RCT |
| Kivipelto, M.; Mangialasche, F.; Ngandu, T.                                                                                                                                                                                                                                  | 2018 | Lifestyle interventions to prevent cognitive impairment, dementia and Alzheimer disease                                                                                                  | Not RCT |
| Kramer, A. F.                                                                                                                                                                                                                                                                | 2000 | Physical and mental training: Implications for cognitive functioning in old age                                                                                                          | Not RCT |
| Kueider, Alexandra M.                                                                                                                                                                                                                                                        | 2017 | Obesity and physical functioning: Associations with cognition in the advanced cognitive training for independent and vital elderly (active) cohort                                       | Not RCT |
| Kume, Y.; Fujita, T.; Uemura, S.; Inomata, S.; Tsugaruya, M.; Sato, A.; Nakamura, Y.; Itakura, Y.; Ota, H.                                                                                                                                                                   | 2019 | Effect of a dual-task exercise to motor and memory function for Japanese older individuals in depopulated rural districts: preliminary intervention research from 2016 to 2019           | Not RCT |
| Kuster, O. C.; Fissler, P.; Laptinskaya, D.; Thurm, F.; Scharpf, A.; Woll, A.; Kolassa, S.; Kramer, A. F.; Elbert, T.; von Arnim, C. A. F.; Kolassa, I. T.                                                                                                                   | 2016 | Cognitive change is more positively associated with an active lifestyle than with training interventions in older adults at risk of dementia: A controlled interventional clinical trial | Not RCT |
| Kwok, J. Y. Y.; Choi, K. C.; Chan, H. Y. L.                                                                                                                                                                                                                                  | 2016 | Effects of mind-body exercises on the physiological and psychosocial well-being of individuals with Parkinson's disease: A systematic review and meta-analysis                           | Not RCT |
| Law, L. L. F.; Barnett, F.; Yau, M. K.; Gray, M. A.                                                                                                                                                                                                                          | 2014 | Effects of combined cognitive and exercise interventions on cognition in older adults with and without cognitive impairment: A systematic review                                         | Not RCT |
| Marmeleira, J.; Galhardas, L.; Raimundo, A.                                                                                                                                                                                                                                  | 2018 | Exercise merging physical and cognitive stimulation improves physical fitness and cognitive functioning in older nursing home residents: a pilot study                                   | Not RCT |
| Horning, Sheena M.; Young, Stephanie; Myhre, Janelle W.; Osato, Sheryl; Wilkins, Stacy Schantz                                                                                                                                                                               | 2016 | A multimodal cognitive enhancement program for older adults: A case report of the implementation of Brain Training                                                                       | Not RCT |
| Ho, R. T.; Wan, A. H.; Au-Yeung, F. S.; Lo, P. H.; Siu, P. J.; Wong, C. P.; Ng, W. Y.; Cheung, I. K.; Ng, S. M.; Chan, C. L.; Chen, E. Y.                                                                                                                                    | 2014 | The psychophysiological effects of Tai-chi and exercise in residential schizophrenic patients: a 3-arm randomized controlled trial                                                       | Not RCT |
| Mayor, S.                                                                                                                                                                                                                                                                    | 2015 | Brain training, exercise, and healthy eating slow cognitive decline in elderly people at risk, study finds                                                                               | Not RCT |
| Glisky, Martha Louise                                                                                                                                                                                                                                                        | 1998 | Interventions for cognitive and psychosocial functioning in older adults: A comparison of aerobic exercise and cognitive training                                                        | Not RCT |
| Michelle, P.; Gail, A. E.; Liam, P. K.; Megan, C. K.; Augustine, J. D.; Elizabeth, M. W.; Beraki, A.; Mahmudul, H. S. M.; Matthew, B. D.; Hailey, D. W.; Laura, K.; Graham, W.; Elaine, S.; Arthur, R. C.; Marie, E. C.; George, S. R.; Craig, M.; Jason, M.; Marilyn, M. L. | 2017 | Aerobic exercise enhances the beneficial effects of cognitive training and reopens the 'window of recovery' in chronic stroke via neurotrophins                                          | Not RCT |
| Chao, Y. Y.; Scherer, Y. K.; Wu, Y. W.; Lucke, K. T.; Montgomery, C. A.                                                                                                                                                                                                      | 2013 | The feasibility of an intervention combining self-efficacy theory and Wii Fit exergames in assisted living residents: A pilot study                                                      | Not RCT |
| Chao, Y. Y.; Scherer, Y. K.; Montgomery, C. A.; Lucke, K. T.; Wu, Y. W.                                                                                                                                                                                                      | 2014 | Exergames-based intervention for assisted living residents: a pilot study                                                                                                                | Not RCT |
| Azman, N.; Suzuki, K.; Suzuki, T.; Ono, Y.; Edanaka, Y.; Kunieda, F.; Nakata, M.; Watanabe, K.                                                                                                                                                                               | 2017 | Effect of dance video game training on elderly's cognitive function                                                                                                                      | Not RCT |
| O'Neil-Pirozzi, T. M.; Hsu, H.                                                                                                                                                                                                                                               | 2016 | Feasibility and benefits of computerized cognitive exercise to adults with chronic moderate-to-severe cognitive impairments following an acquired brain injury: A pilot study            | Not RCT |
| Nitz, J. C.; Kuys, S.; Isles, R.; Fu, S.                                                                                                                                                                                                                                     | 2010 | Is the Wii Fit a new-generation tool for improving balance, health and well-being? A pilot study                                                                                         | Not RCT |

|                                                                                                                                                                                                                                                                                                                                                                                                                            |      |                                                                                                                                                                                  |         |
|----------------------------------------------------------------------------------------------------------------------------------------------------------------------------------------------------------------------------------------------------------------------------------------------------------------------------------------------------------------------------------------------------------------------------|------|----------------------------------------------------------------------------------------------------------------------------------------------------------------------------------|---------|
| Orellano, E.; Colon, W. I.; Arbesman, M.                                                                                                                                                                                                                                                                                                                                                                                   | 2012 | Effect of occupation- and activity-based interventions on instrumental activities of daily living performance among community-dwelling older adults: A systematic review         | Not RCT |
| Oswald, Wolf D.; Ackermann, Andreas; Gunzelmann, Thomas                                                                                                                                                                                                                                                                                                                                                                    | 2006 | Effects of a Multimodal Activity Program in Nursing-Home Residents                                                                                                               | Not RCT |
| Pereira, C.; Rosado, H.; Cruz-Ferreira, A.; Marmeleira, J.                                                                                                                                                                                                                                                                                                                                                                 | 2018 | Effects of a 10-week multimodal exercise program on physical and cognitive function of nursing home residents: A psychomotor intervention pilot study                            | Not RCT |
| Gonzalez-Palau, F.; Franco, M.; Bamidis, P.; Losada, R.; Parra, E.; Papageorgiou, S. G.; Vivas, A. B.                                                                                                                                                                                                                                                                                                                      | 2014 | The effects of a computer-based cognitive and physical training program in a healthy and mildly cognitive impaired aging sample                                                  | Not RCT |
| Ansai, J. H.; de Andrade, L. P.; de Souza Buto, M. S.; de Vassimon Barroso, V.; Farche, A. C.; Rossi, P. G.; de Medeiros Takahashi, A. C.                                                                                                                                                                                                                                                                                  | 2017 | Effects of the Addition of a Dual Task to a Supervised Physical Exercise Program on Older Adults' Cognitive Performance                                                          | Not RCT |
| Sapi, M.; Domjan, A.; Feherne Kiss, A.; Pinter, S.                                                                                                                                                                                                                                                                                                                                                                         | 2019 | Is Kinect Training Superior to Conventional Balance Training for Healthy Older Adults to Improve Postural Control?                                                               | Not RCT |
| Oswald, W. D.; Gunzelmann, T.; Rupprecht, R.; Hagen, B.                                                                                                                                                                                                                                                                                                                                                                    | 2006 | Differential effects of single versus combined cognitive and physical training with older adults: the SimA study in a 5-year perspective                                         | Not RCT |
| Bruce, H.; Lai, L.; Bherer, L.; Lussier, M.; St-Onge, N.; Li, K. Z. H.                                                                                                                                                                                                                                                                                                                                                     | 2019 | The effect of simultaneously and sequentially delivered cognitive and aerobic training on mobility among older adults with hearing loss                                          | Not RCT |
| Bamidis, P. D.; Fissler, P.; Papageorgiou, S. G.; Zilidou, V.; Konstantinidis, E. I.; Billis, A. S.; Romanopoulou, E.; Karagianni, M.; Bearatis, I.; Tsapanou, A.; Tsilikopoulou, G.; Grigoriadou, E.; Ladas, A.; Kyriolidou, A.; Tsolaki, A.; Frantzidis, C.; Sidiropoulos, E.; Siountas, A.; Matsi, S.; Papatriantafyllou, J.; Margioti, E.; Nika, A.; Schlee, W.; Elbert, T.; Tsolaki, M.; Vivas, A. B.; Kolassa, I. T. | 2015 | Gains in cognition through combined cognitive and physical training: The role of training dosage and severity of neurocognitive disorder                                         | Not RCT |
| Alves, M. L. M.; Mesquita, B. S.; Morais, W. S.; Leal, J. C.; Satler, C. E.; Dos Santos Mendes, F. A.                                                                                                                                                                                                                                                                                                                      | 2018 | Nintendo Wii™ Versus Xbox Kinect™ for Assisting People With Parkinson's Disease                                                                                                  | Not RCT |
| Wayne, P. M.; Walsh, J.; Taylor-Piliae, R.; Wells, R.; Papp, K.; Donovan, N.; Yeh, G.                                                                                                                                                                                                                                                                                                                                      | 2014 | The impact of Tai-Chi on cognitive performance in older adults: A systematic review and meta-analysis                                                                            | Not RCT |
| Wall, K.; Stark, J.; Schillaci, A.; Saulnier, E. T.; McLaren, E.; Striegnitz, K.; Cohen, B. D.; Arciero, P. J.; Kramer, A. F.; Anderson-Hanley, C.                                                                                                                                                                                                                                                                         | 2018 | The Enhanced Interactive Physical and Cognitive Exercise System (iPACES™ v2.0): Pilot Clinical Trial of an In-Home iPad-Based Neuro-Exergame for Mild Cognitive Impairment (MCI) | Not RCT |
| Walton, C. C.; Mowszowski, L.; Lewis, S. J. G.; Naismith, S. L.                                                                                                                                                                                                                                                                                                                                                            | 2014 | Stuck in the mud: Time for change in the implementation of cognitive training research in ageing?                                                                                | Not RCT |
| Woodard, J. L.; Sugarman, M. A.; Nielson, K. A.; Smith, J. C.; Seidenberg, M.; Durgerian, S.; Butts, A.; Hantke, N.; Lancaster, M.; Matthews, M. A.; Rao, S. M.                                                                                                                                                                                                                                                            | 2012 | Lifestyle and genetic contributions to cognitive decline and hippocampal structure and function in healthy aging                                                                 | Not RCT |
| Wang, S.; Yin, H.; Jia, Y.; Zhao, L.; Wang, L.; Chen, L.                                                                                                                                                                                                                                                                                                                                                                   | 2018 | Effects of mind-body exercise on cognitive function in older adults with cognitive impairment: A systematic review and meta-analysis                                             | Not RCT |
| Young, J.; Angevaren, M.; Rusted, J.; Tabet, N.                                                                                                                                                                                                                                                                                                                                                                            | 2015 | Aerobic exercise to improve cognitive function in older people without known cognitive impairment                                                                                | Not RCT |
| Zhu, X.; Yin, S.; Lang, M.; He, R.; Li, J.                                                                                                                                                                                                                                                                                                                                                                                 | 2016 | The more the better? A meta-analysis on effects of combined cognitive and physical intervention on cognition in healthy older adults                                             | Not RCT |
| Wu, C.; Yi, Q.; Zheng, X.; Cui, S.; Chen, B.; Lu, L.; Tang, C.                                                                                                                                                                                                                                                                                                                                                             | 2019 | Effects of Mind-Body Exercises on Cognitive Function in Older Adults: A Meta-Analysis                                                                                            | Not RCT |
| Zou, L.; Loprinzi, P. D.; Yeung, A. S.; Zeng, N.; Huang, T.                                                                                                                                                                                                                                                                                                                                                                | 2019 | The Beneficial Effects of Mind-Body Exercises for People With Mild Cognitive Impairment: a Systematic Review With Meta-analysis                                                  | Not RCT |
| Vasques, P. E.; Moraes, H.; Silveira, H.; Deslandes, A. C.; Laks, J.                                                                                                                                                                                                                                                                                                                                                       | 2011 | Acute exercise improves cognition in the depressed elderly: The effect of dual-tasks                                                                                             | Not RCT |
| Vaportzis, E.; Niechcial, M. A.; Gow, A. J.                                                                                                                                                                                                                                                                                                                                                                                | 2019 | A systematic literature review and meta-analysis of real-world interventions for cognitive ageing in healthy older adults                                                        | Not RCT |
| Rosenberg, D.; Depp, C. A.; Vahia, I. V.; Reichstadt, J.; Palmer, B. W.; Kerr, J.; Norman, G.; Jeste, D. V.                                                                                                                                                                                                                                                                                                                | 2010 | Exergames for subsyndromal depression in older adults: A pilot study of a novel intervention                                                                                     | Not RCT |
| Garcia, J. A.; Schoene, D.; Lord, S. R.; Delbaere, K.; Valenzuela, T.; Navarro, K. F.                                                                                                                                                                                                                                                                                                                                      | 2016 | A Bespoke Kinect Stepping Exergame for Improving Physical and Cognitive Function in Older People: A Pilot Study                                                                  | Not RCT |

|                                                                                                                                                                                                                                                                                                                                                                                                                                                                                                                                                                                                                                                                                                                                                                                                                                                                                                                                                                                                                                                                                                                                                                                                                                                                                                                                                                                                                                                                                                                                                                                                                                                                                                                                                                                                                                                                                                                                                                                                                                                                                                                                                                                                                                |      |                                                                                                                                                                  |         |
|--------------------------------------------------------------------------------------------------------------------------------------------------------------------------------------------------------------------------------------------------------------------------------------------------------------------------------------------------------------------------------------------------------------------------------------------------------------------------------------------------------------------------------------------------------------------------------------------------------------------------------------------------------------------------------------------------------------------------------------------------------------------------------------------------------------------------------------------------------------------------------------------------------------------------------------------------------------------------------------------------------------------------------------------------------------------------------------------------------------------------------------------------------------------------------------------------------------------------------------------------------------------------------------------------------------------------------------------------------------------------------------------------------------------------------------------------------------------------------------------------------------------------------------------------------------------------------------------------------------------------------------------------------------------------------------------------------------------------------------------------------------------------------------------------------------------------------------------------------------------------------------------------------------------------------------------------------------------------------------------------------------------------------------------------------------------------------------------------------------------------------------------------------------------------------------------------------------------------------|------|------------------------------------------------------------------------------------------------------------------------------------------------------------------|---------|
| Fraser, S. A.; Elliott, V.; de Bruin, E. D.; Bherer, L.; Dumoulin, C.                                                                                                                                                                                                                                                                                                                                                                                                                                                                                                                                                                                                                                                                                                                                                                                                                                                                                                                                                                                                                                                                                                                                                                                                                                                                                                                                                                                                                                                                                                                                                                                                                                                                                                                                                                                                                                                                                                                                                                                                                                                                                                                                                          | 2014 | The Effects of Combining Videogame Dancing and Pelvic Floor Training to Improve Dual-Task Gait and Cognition in Women with Mixed-Urinary Incontinence            | Not RCT |
| De Boer, C.; Echlin, H. V.; Rogojin, A.; Baltaretu, B. R.; Sergio, L. E.                                                                                                                                                                                                                                                                                                                                                                                                                                                                                                                                                                                                                                                                                                                                                                                                                                                                                                                                                                                                                                                                                                                                                                                                                                                                                                                                                                                                                                                                                                                                                                                                                                                                                                                                                                                                                                                                                                                                                                                                                                                                                                                                                       | 2018 | Thinking-While-Moving Exercises May Improve Cognition in Elderly with Mild Cognitive Deficits: A Proof-of-Principle Study                                        | Not RCT |
| De Andrade, L. P.; Gobbi, L. T. B.; Coelho, F. G. M.; Christofoletti, G.; Riani Costa, J. L.; Stella, F.                                                                                                                                                                                                                                                                                                                                                                                                                                                                                                                                                                                                                                                                                                                                                                                                                                                                                                                                                                                                                                                                                                                                                                                                                                                                                                                                                                                                                                                                                                                                                                                                                                                                                                                                                                                                                                                                                                                                                                                                                                                                                                                       | 2013 | Benefits of multimodal exercise intervention for postural control and frontal cognitive functions in individuals with Alzheimer's disease: A controlled trial    | Not RCT |
| Coley, N.; Ngandu, T.; Lehtisalo, J.; Soininen, H.; Vellas, B.; Richard, E.; Kivipelto, M.; Andrieu, S.; van Gool, P.; van Charante, E. M.; Beishuizen, C.; Jongstra, S.; van Middelaar, T.; van Wanrooij, L.; Hoevenaer-Blom, M.; Barbera, M.; Mangiasche, F.; Guillemont, J.; Meiller, Y.; van de Groep, B.; Brayne, C.; Solomon, A.; Laatikainen, T.; Strandberg, T.; Tuomilehto, J.; Antikainen, R.; Lindstrom, J.; Havulinna, S.; Rauramaa, R.; Hanninen, T.; Backman, L.; Stigsdotter-Neely, A.; Jula, A.; Peltonen, M.; Levalahti, E.; Gronholm, M.; Hemio, K.; Guyonnet, S.; Carrie, I.; Brigitte, L.; Faisant, C.; Lala, F.; Delrieu, J.; Villars, H.; Combrouze, E.; Badufle, C.; Zueras, A.; Cantet, C.; Morin, C.; Van Kan, G. A.; Dupuy, C.; Rolland, Y.; Caillaud, C.; Ousset, P. J.; Fougere, B.; Willis, S.; Belleville, S.; Gilbert, B.; Fontaine, F.; Dartigues, J. F.; Marcet, I.; Delva, F.; Foubert, A.; Cerda, S.; Marie Noelle, Cuffi; Costes, C.; Rouaud, O.; Manckoundia, P.; Quipourt, V.; Marilier, S.; Franon, E.; Bories, L.; Pader, M. L.; Basset, M. F.; Lapoujade, B.; Faure, V.; Yung Tong, M. L.; Malick-Loiseau, C.; Cazaban-Campistron, E.; Desclaux, F.; Blatge, C.; Dantoine, T.; Laubarie-Mouret, C.; Saulnier, I.; Clement, J. P.; Picat, M. A.; Bernard-Bourzeix, L.; Willebois, S.; Desormais, I.; Cardinaud, N.; Bonnefoy, M.; Livet, P.; Rebaudet, P.; Gedeon, C.; Burdet, C.; Terracol, F.; Pesce, A.; Roth, S.; Chaillou, S.; Louchart, S.; Sudres, K.; Lebrun, N.; Barro-Belaygues, N.; Touchon, J.; Bennys, K.; Gabelle, A.; Romano, A.; Touati, L.; Marelli, C.; Pays, C.; Robert, P.; Le Duff, F.; Gervais, C.; Gonfrier, S.; Gasmier, Y.; Bordes, S.; Begorre, D.; Carpuat, C.; Khales, K.; Lefebvre, J. F.; El Idrissi, S. M.; Skolil, P.; Salles, J. P.; Dufouil, C.; Lehericy, S.; Chupin, M.; Mangin, J. F.; Bouhayia, A.; Allard, M.; Ricolfi, F.; Dubois, D.; Bonceour Martel, M. P.; Cotton, F.; Bonafe, A.; Chanalet, S.; Hugon, F.; Bonneville, F.; Cognard, C.; Chollet, F.; Payoux, P.; Voisin, T.; Peiffer, S.; Hitzel, A.; Zanca, M.; Monteil, J.; Darcourt, J.; Molinier, L.; Derumeaux, H.; Costa, N.; Vincent, C.; Perret, B.; Vinel, C.; Olivier-Abbal, P. | 2019 | Adherence to multidomain interventions for dementia prevention: Data from the FINGER and MAPT trials                                                             | Not RCT |
| Coelho-Junior, H. J.; Goncalves, I. D. O.; Sanches, I. C.; Goncalves, L.; Caperuto, E. C.; Uchida, M. C.; Rodrigues, B.                                                                                                                                                                                                                                                                                                                                                                                                                                                                                                                                                                                                                                                                                                                                                                                                                                                                                                                                                                                                                                                                                                                                                                                                                                                                                                                                                                                                                                                                                                                                                                                                                                                                                                                                                                                                                                                                                                                                                                                                                                                                                                        | 2018 | Multicomponent Exercise Improves Physical Functioning but Not Cognition and Hemodynamic Parameters in Elderly Osteoarthritis Patients Regardless of Hypertension | Not RCT |
| Coelho, F. G. M.; Andrade, L. P.; Pedrosa, R. V.; Santos-Galduroz, R. F.; Gobbi, S.; Costa, J. L. R.; Gobbi, L. T. B.                                                                                                                                                                                                                                                                                                                                                                                                                                                                                                                                                                                                                                                                                                                                                                                                                                                                                                                                                                                                                                                                                                                                                                                                                                                                                                                                                                                                                                                                                                                                                                                                                                                                                                                                                                                                                                                                                                                                                                                                                                                                                                          | 2013 | Multimodal exercise intervention improves frontal cognitive functions and gait in Alzheimer's disease: A controlled trial                                        | Not RCT |
| Cavallo, M.; Cavanna, A. E.; Harciarek, M.; Johnston, H.; Ostacoli, L.; Angilletta, C.                                                                                                                                                                                                                                                                                                                                                                                                                                                                                                                                                                                                                                                                                                                                                                                                                                                                                                                                                                                                                                                                                                                                                                                                                                                                                                                                                                                                                                                                                                                                                                                                                                                                                                                                                                                                                                                                                                                                                                                                                                                                                                                                         | 2013 | "Keep up the good work!": A case study of the effects of a specific cognitive training in Alzheimer's disease                                                    | Not RCT |
| Cavallo, M.; Angilletta, C.                                                                                                                                                                                                                                                                                                                                                                                                                                                                                                                                                                                                                                                                                                                                                                                                                                                                                                                                                                                                                                                                                                                                                                                                                                                                                                                                                                                                                                                                                                                                                                                                                                                                                                                                                                                                                                                                                                                                                                                                                                                                                                                                                                                                    | 2016 | A case study of the long-lasting effects of cognitive training on similar tasks in Alzheimer's disease                                                           | Not RCT |

|                                                                                                                                                                             |      |                                                                                                                                                                                                                                                                                             |         |
|-----------------------------------------------------------------------------------------------------------------------------------------------------------------------------|------|---------------------------------------------------------------------------------------------------------------------------------------------------------------------------------------------------------------------------------------------------------------------------------------------|---------|
| Carrasco, Maria; Ortiz-Maques, Nuria; Martinez-Rodriguez, Silvia                                                                                                            | 2019 | Playing with nintendo wii sports: Impact on physical activity, perceived health and cognitive functioning of a group of community-dwelling older adults                                                                                                                                     | Not RCT |
| Ben-Sadoun, G.; Sacco, G.; Manera, V.; Bourgeois, J.; Konig, A.; Foulon, P.; Fosty, B.; Bremond, F.; D'Arripe-Longueville, F.; Robert, P.                                   | 2016 | Physical and Cognitive Stimulation Using an Exergame in Subjects with Normal Aging, Mild and Moderate Cognitive Impairment                                                                                                                                                                  | Not RCT |
| Cancela, Jose M.; Vila Suarez, Ma Helena; Vasconcelos, Jamine; Lima, Ana; Ayan, Carlos                                                                                      | 2015 | Efficacy of brain gym training on the cognitive performance and fitness level of active older adults: A preliminary study                                                                                                                                                                   | Not RCT |
| Cai, H.; Li, G.; Jiang, S.; Yin, H.; Liu, P.; Chen, L.                                                                                                                      | 2019 | Effect of Low-Intensity, Kinect™-Based Kaimai-Style Qigong Exercise in Older Adults With Type 2 Diabetes                                                                                                                                                                                    | Not RCT |
| Cadore, E. L.; Moneo, A. B. B.; Mensat, M. M.; Munoz, A. R.; Casas-Herrero, A.; Rodriguez-Manas, L.; Izquierdo, M.                                                          | 2014 | Positive effects of resistance training in frail elderly patients with dementia after long-term physical restraint                                                                                                                                                                          | Not RCT |
| Bruderer-Hofstetter, M.; Rausch-Osthoff, A. K.; Meichtry, A.; Munzer, T.; Niedermann, K.                                                                                    | 2018 | Effective multicomponent interventions in comparison to active control and no interventions on physical capacity, cognitive function and instrumental activities of daily living in elderly people with and without mild impaired cognition - A systematic review and network meta-analysis | Not RCT |
| Bock, B. C.; Thind, H.; Dunsiger, S. I.; Serber, E. R.; Ciccolo, J. T.; Cobb, V.; Palmer, K.; Abernathy, S.; Marcus, B. H.                                                  | 2015 | Exercise videogames for physical activity and fitness: Design and rationale of the Wii Heart Fitness trial                                                                                                                                                                                  | Not RCT |
| Bamidis, P. D.; Vivas, A. B.; Styliadis, C.; Frantzidis, C.; Klados, M.; Schlee, W.; Siountas, A.; Papageorgiou, S. G.                                                      | 2014 | A review of physical and cognitive interventions in aging                                                                                                                                                                                                                                   | Not RCT |
| Arlati, S.; Colombo, V.; Spoladore, D.; Greci, L.; Pedrolì, E.; Serino, S.; Ciproso, P.; Goulene, K.; Stramba-Badiale, M.; Riva, G.; Gaggioli, A.; Fserrigno, G.; Sacco, M. | 2019 | A Social Virtual Reality-Based Application for the Physical and Cognitive Training of the Elderly at Home                                                                                                                                                                                   | Not RCT |
| Arkin, S. M.                                                                                                                                                                | 2001 | Alzheimer rehabilitation by students: Interventions and outcomes                                                                                                                                                                                                                            | Not RCT |
| Antwi, F. A.; Fazylova, N.; Garcon, M. C.; Lopez, L.; Rubiano, R.; Slyer, J. T.                                                                                             | 2013 | Effectiveness of web-based programs on the reduction of childhood obesity in school-aged children: A systematic review                                                                                                                                                                      | Not RCT |
| Angelucci, F.; Caltagirone, C.; Costa, A.                                                                                                                                   | 2015 | Cognitive training in neurodegenerative diseases: A way to boost neuroprotective molecules?                                                                                                                                                                                                 | Not RCT |
| Anderson, J. G.; Lopez, R. P.; Rose, K. M.; Specht, J. K.                                                                                                                   | 2017 | Nonpharmacological Strategies for Patients With Early-Stage Dementia or Mild Cognitive Impairment: A 10-Year Update                                                                                                                                                                         | Not RCT |
| Scott, I.; Cooper, C.; Leverton, M.; Burton, A.; Beresford-Dent, J.; Rockwood, K.; Butler, L.; Rapaport, P.                                                                 | 2019 | Effects of nonpharmacological interventions on functioning of people living with dementia at home: A systematic review of randomised controlled trials                                                                                                                                      | Not RCT |
| Shah, T.; Verdile, G.; Sohrabi, H.; Campbell, A.; Putland, E.; Cheetham, C.; Dhaliwal, S.; Weinborn, M.; Maruff, P.; Darby, D.; Martins, R. N.                              | 2014 | A combination of physical activity and computerized brain training improves verbal memory and increases cerebral glucose metabolism in the elderly                                                                                                                                          | Not RCT |
| Anderson-Hanley, C.; Arciero, P. J.; Barcelos, N.; Nimon, J.; Rocha, T.; Thurin, M.; Maloney, M.                                                                            | 2014 | Executive function and self-regulated exergaming adherence among older adults                                                                                                                                                                                                               | Not RCT |
| Amoyal, N.; Fallon, E.                                                                                                                                                      | 2012 | Physical exercise and cognitive training clinical interventions used in slowing degeneration associated with mild cognitive impairment: A review of the recent literature                                                                                                                   | Not RCT |
| Anderson-Hanley, C.; Stark, J.; Wall, K. M.; VanBrakle, M.; Michel, M.; Maloney, M.; Barcelos, N.; Striegnitz, K.; Cohen, B. D.; Kramer, A. F.                              | 2018 | The interactive Physical and Cognitive Exercise System (iPACESTM): effects of a 3-month in-home pilot clinical trial for mild cognitive impairment and caregivers                                                                                                                           | Not RCT |
| Wiloth, S.; Lemke, N.; Werner, C.; Hauer, K.                                                                                                                                | 2016 | Validation of a Computerized, Game-based Assessment Strategy to Measure Training Effects on Motor-Cognitive Functions in People With Dementia                                                                                                                                               | Not RCT |

## Appendix D. Risk of bias within individual studies

| Study                    | Randomization process | Deviations from intended interventions | Missing outcome data | Measurement of the outcome | Selection of the reported result | Overall Bias         |
|--------------------------|-----------------------|----------------------------------------|----------------------|----------------------------|----------------------------------|----------------------|
| Adcock 2020              | Some concerns         | High                                   | Some concerns        | Some concerns              | Low                              | <b>Some concerns</b> |
| Anderson-Hanley 2018     | Some concerns         | High                                   | High                 | Some concerns              | Some concerns                    | <b>High</b>          |
| Bacha 2018               | Low                   | Some concerns                          | Low                  | Some concerns              | Low                              | <b>Some concerns</b> |
| Barban 2017              | Low                   | Some concerns                          | Low                  | Low                        | Some concerns                    | <b>Low</b>           |
| Barcelos 2015            | Some concerns         | High                                   | High                 | Some concerns              | Some concerns                    | <b>High</b>          |
| Barnes 2013              | Low                   | Some concerns                          | Low                  | Low                        | Low                              | <b>Low</b>           |
| Boa Sorte Silva 2018     | Low                   | Low                                    | Low                  | Low                        | Low                              | <b>Low</b>           |
| Combourieu Donnezan 2018 | Some concerns         | High                                   | Some concerns        | Some concerns              | Some concerns                    | <b>Some concerns</b> |
| Damirchi 2018            | Some concerns         | High                                   | High                 | Some concerns              | Some concerns                    | <b>High</b>          |
| Delbroek 2017            | Some concerns         | Some concerns                          | Low                  | Low                        | Some concerns                    | <b>Low</b>           |
| Desjardins-Crepau 2016   | Some concerns         | High                                   | High                 | Low                        | Some concerns                    | <b>High</b>          |
| Eggenberger 2015         | Some concerns         | High                                   | Some concerns        | Some concerns              | Some concerns                    | <b>Some concerns</b> |
| Eggenberger 2016         | Some concerns         | Some concerns                          | Some concerns        | Some concerns              | Low                              | <b>Some concerns</b> |
| Fabre 2002               | Some concerns         | Some concerns                          | Some concerns        | Some concerns              | Some concerns                    | <b>Some concerns</b> |
| Fiatarone Singh 2014     | Low                   | Some concerns                          | Low                  | Low                        | Low                              | <b>Low</b>           |
| Gschwind 2015            | Some concerns         | Some concerns                          | Low                  | Low                        | Low                              | <b>Low</b>           |
| Hagovska 2016            | Low                   | Some concerns                          | Low                  | Some concerns              | High                             | <b>Some concerns</b> |
| Hiyamizu 2011            | Low                   | Some concerns                          | Some concerns        | Some concerns              | Some concerns                    | <b>Some concerns</b> |
| Htut 2018                | Some concerns         | Low                                    | Low                  | Low                        | Some concerns                    | <b>Low</b>           |
| Hughes 2014              | Some concerns         | Low                                    | Low                  | Some concerns              | Some concerns                    | <b>Some concerns</b> |
| Karssemeijer 2019        | Some concerns         | Some concerns                          | Low                  | Low                        | Low                              | <b>Low</b>           |
| Kitazawa 2015            | Some concerns         | Low                                    | Low                  | Low                        | Some concerns                    | <b>Low</b>           |
| Lataar 2018              | Low                   | High                                   | High                 | High                       | Some concerns                    | <b>High</b>          |
| Legault 2011             | Some concerns         | Low                                    | Low                  | Low                        | Low                              | <b>Low</b>           |
| Leon 2015                | Some concerns         | Some concerns                          | High                 | High                       | Some concerns                    | <b>High</b>          |
| Linde 2014               | Low                   | High                                   | Some concerns        | Low                        | Some concerns                    | <b>Some concerns</b> |
| Maffei 2017              | Low                   | High                                   | Low                  | Low                        | Low                              | <b>Low</b>           |
| Maillot 2012             | Some concerns         | Some concerns                          | Low                  | Some concerns              | Some concerns                    | <b>Some concerns</b> |
| McDaniel 2014            | Some concerns         | Low                                    | Low                  | Low                        | Some concerns                    | <b>Low</b>           |
| Mrakic-Sposta 2018       | Some concerns         | High                                   | Some concerns        | Some concerns              | Some concerns                    | <b>Some concerns</b> |
| Nishiguchi 2015          | Some concerns         | Low                                    | Low                  | Low                        | Some concerns                    | <b>Low</b>           |
| Norouzi 2019             | Some concerns         | Low                                    | Low                  | Some concerns              | Some concerns                    | <b>Some concerns</b> |
| Park 2019                | Some concerns         | Some concerns                          | Low                  | Some concerns              | Some concerns                    | <b>Some concerns</b> |
| Pompeu 2012              | Low                   | Low                                    | Low                  | Low                        | Low                              | <b>Low</b>           |
| Rahe 2015                | Some concerns         | High                                   | Some concerns        | Low                        | Low                              | <b>Some concerns</b> |
| Reigal 2014              | Some concerns         | Some concerns                          | High                 | Low                        | Some concerns                    | <b>High</b>          |
| Rezola-Pardo 2019        | Low                   | Low                                    | Low                  | Low                        | Some concerns                    | <b>Low</b>           |

|                     |               |               |               |               |               |                      |
|---------------------|---------------|---------------|---------------|---------------|---------------|----------------------|
| Romera-Liebana 2018 | Low           | Low           | Low           | Low           | Low           | <b>Low</b>           |
| Schattin 2016       | Low           | Some concerns | Some concerns | Some concerns | High          | <b>Some concerns</b> |
| Schoene 2013        | Low           | Some concerns | High          | Low           | Some concerns | <b>High</b>          |
| Schoene 2015        | Low           | High          | Low           | Low           | Low           | <b>Low</b>           |
| Shatil 2013         | Some concerns | High          | High          | Some concerns | Some concerns | <b>High</b>          |
| Shimada 2018        | Low           | Some concerns | Low           | Low           | High          | <b>Low</b>           |
| Song 2018           | Low           | Some concerns | Low           | Low           | Low           | <b>Low</b>           |
| Stanmore 2019       | Low           | Some concerns | Low           | Some concerns | Low           | <b>Some concerns</b> |
| Ten Brinke 2019     | Low           | Some concerns | Low           | Low           | Low           | <b>Low</b>           |
| Van het Reve 2014   | Low           | Some concerns | High          | Some concerns | Some concerns | <b>High</b>          |

## Appendix E. Funnel plots of cognitive, physical and psychosocial outcomes

### Cognitive outcomes (with outliers)

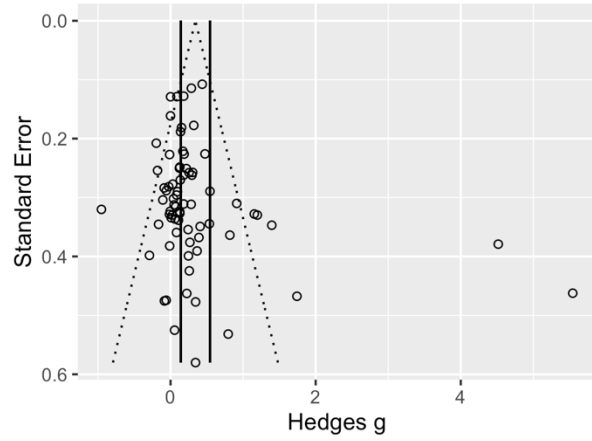

### Cognitive outcomes (without outliers)

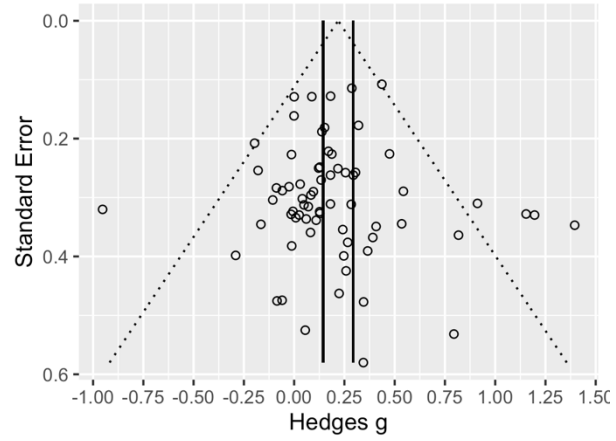

### Physical outcomes

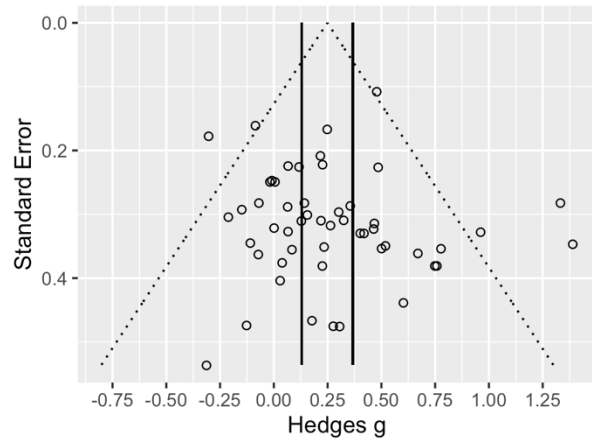

### Psychosocial outcomes (with outlier)

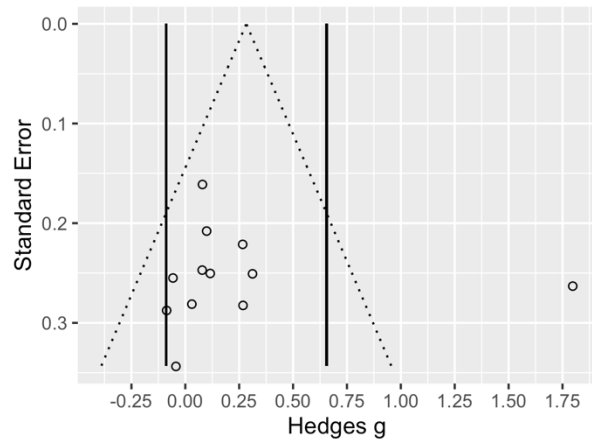

### Psychosocial outcomes (without outlier)

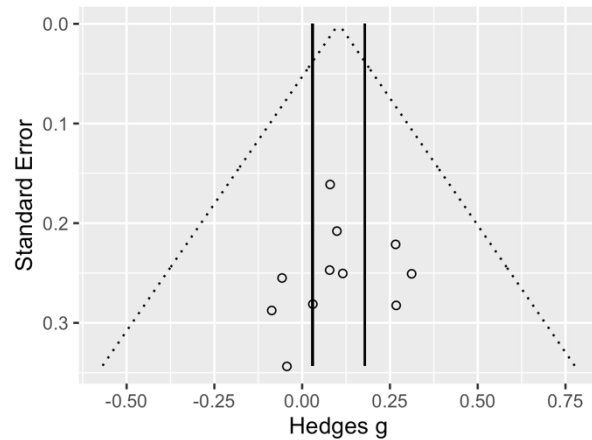

## Appendix F. Results of individual studies and comparisons: Overall cognition

| RoB           | Population | Study                | Intervention | Control | Hedges' <i>g</i> | 95% Lower limit | 95% Upper limit |
|---------------|------------|----------------------|--------------|---------|------------------|-----------------|-----------------|
| Low           | Healthy    | Gschwind 2015        | Exergame     | Passive | 0.00             | -0.32           | 0.32            |
| Low           | Healthy    | Htut 2018            | Exergame     | Passive | 1.20             | 0.55            | 1.84            |
| Low           | Healthy    | Htut 2018            | Exergame     | PE      | 1.15             | 0.51            | 1.80            |
| Low           | Healthy    | Htut 2018            | Exergame     | Sham    | -0.95            | -1.58           | -0.33           |
| Low           | Healthy    | Schoene 2015         | Exergame     | Passive | 0.17             | -0.26           | 0.60            |
| Low           | Healthy    | Barban 2017          | Sequential   | CT      | 0.00             | -0.25           | 0.25            |
| Low           | Healthy    | Barban 2017          | Sequential   | PE      | 0.09             | -0.16           | 0.34            |
| Low           | Healthy    | Barban 2017          | Sequential   | Sham    | 0.18             | -0.07           | 0.43            |
| Low           | Healthy    | Barnes 2013          | Sequential   | CT      | 0.12             | -0.37           | 0.61            |
| Low           | Healthy    | Barnes 2013          | Sequential   | PE      | 0.22             | -0.27           | 0.71            |
| Low           | Healthy    | Barnes 2013          | Sequential   | Sham    | 0.13             | -0.36           | 0.61            |
| Low           | Healthy    | Legault 2011         | Sequential   | CT      | 0.06             | -0.60           | 0.72            |
| Low           | Healthy    | Legault 2011         | Sequential   | PE      | 0.11             | -0.55           | 0.77            |
| Low           | Healthy    | Legault 2011         | Sequential   | Sham    | 0.01             | -0.65           | 0.66            |
| Low           | Healthy    | McDaniel 2014        | Sequential   | CT      | 0.02             | -0.62           | 0.67            |
| Low           | Healthy    | McDaniel 2014        | Sequential   | PE      | 0.18             | -0.43           | 0.79            |
| Low           | Healthy    | McDaniel 2014        | Sequential   | Sham    | 0.13             | -0.51           | 0.76            |
| Low           | Healthy    | Romera-Liebana 2018  | Sequential   | Passive | 0.44             | 0.23            | 0.65            |
| Low           | Healthy    | ten Brinke 2019      | Sequential   | CT      | -0.01            | -0.46           | 0.43            |
| Low           | Healthy    | ten Brinke 2019      | Sequential   | Sham    | 0.19             | -0.26           | 0.63            |
| Low           | Healthy    | Boa Sorte Silva 2018 | Simultaneous | PE      | 0.32             | -0.03           | 0.67            |
| Low           | Healthy    | Kitazawa 2015        | Simultaneous | Passive | 0.31             | -0.20           | 0.81            |
| Low           | Healthy    | Nishiguchi 2015      | Simultaneous | Passive | 0.54             | -0.02           | 1.11            |
| Low           | MCI        | Delbroek 2017        | Exergame     | Passive | 0.22             | -0.68           | 1.13            |
| Low           | MCI        | Fiatarone Singh 2014 | Sequential   | CT      | 0.03             | -0.51           | 0.57            |
| Low           | MCI        | Fiatarone Singh 2014 | Sequential   | PE      | -0.09            | -0.64           | 0.47            |
| Low           | MCI        | Fiatarone Singh 2014 | Sequential   | Sham    | 0.13             | -0.40           | 0.66            |
| Low           | MCI        | Maffei 2017          | Sequential   | Passive | 0.14             | -0.23           | 0.51            |
| Low           | MCI        | Shimada 2018         | Simultaneous | Sham    | 0.29             | 0.06            | 0.51            |
| Some concerns | Healthy    | Adcock 2020          | Exergame     | Passive | 0.08             | -0.62           | 0.79            |
| Some concerns | Healthy    | Bacha 2018           | Exergame     | PE      | 0.10             | -0.47           | 0.66            |
| Some concerns | Healthy    | Eggenberger 2015     | Exergame     | PE      | -0.03            | -0.58           | 0.53            |
| Some concerns | Healthy    | Eggenberger 2016     | Exergame     | PE      | -0.17            | -0.84           | 0.51            |
| Some concerns | Healthy    | Maillot 2012         | Exergame     | Passive | 0.82             | 0.10            | 1.53            |
| Some concerns | Healthy    | Schattin 2016        | Exergame     | PE      | 0.27             | -0.47           | 1.00            |
| Some concerns | Healthy    | Fabre 2002           | Sequential   | CT      | -0.06            | -0.99           | 0.87            |
| Some concerns | Healthy    | Fabre 2002           | Sequential   | PE      | -0.09            | -1.02           | 0.85            |
| Some concerns | Healthy    | Fabre 2002           | Sequential   | Sham    | 0.35             | -0.59           | 1.28            |
| Some concerns | Healthy    | Linde 2014           | Sequential   | CT      | -0.01            | -0.76           | 0.74            |
| Some concerns | Healthy    | Linde 2014           | Sequential   | Passive | 0.39             | -0.33           | 1.11            |
| Some concerns | Healthy    | Linde 2014           | Sequential   | PE      | 0.24             | -0.45           | 0.94            |
| Some concerns | Healthy    | Rahe 2015            | Sequential   | CT      | 0.08             | -0.50           | 0.66            |
| Some concerns | Healthy    | Rahe 2015            | Sequential   | CT      | 0.04             | -0.55           | 0.63            |
| Some concerns | Healthy    | Eggenberger 2015     | Simultaneous | PE      | -0.06            | -0.62           | 0.51            |



|               |         |                          |              |         |       |       |      |
|---------------|---------|--------------------------|--------------|---------|-------|-------|------|
| Some concerns | Healthy | Hiyamizu 2012            | Simultaneous | PE      | -0.01 | -0.66 | 0.63 |
| Some concerns | Healthy | Norouzi 2019             | Simultaneous | PE      | 0.28  | -0.33 | 0.89 |
| Some concerns | Healthy | Norouzi 2019             | Simultaneous | Sham    | 1.40  | 0.72  | 2.08 |
| Some concerns | MCI     | Hughes 2014              | Exergame     | Sham    | 0.37  | -0.41 | 1.14 |
| Some concerns | MCI     | Stanmore 2019            | Exergame     | Passive | -0.20 | -0.60 | 0.21 |
| Some concerns | MCI     | Hagovska 2016            | Sequential   | PE      | 0.47  | 0.03  | 0.92 |
| Some concerns | MCI     | Combourieu Donnezan 2018 | Simultaneous | CT      | 0.13  | -0.51 | 0.77 |
| Some concerns | MCI     | Combourieu Donnezan 2018 | Simultaneous | Passive | 0.53  | -0.14 | 1.21 |
| Some concerns | MCI     | Combourieu Donnezan 2018 | Simultaneous | PE      | 0.07  | -0.55 | 0.69 |
| Some concerns | MCI     | Mrakic-Sposta 2018       | Simultaneous | Passive | 0.34  | -0.79 | 1.48 |
| Some concerns | MCI     | Park 2019                | Simultaneous | Passive | 0.91  | 0.30  | 1.53 |
| High          | Healthy | Schoene 2013             | Exergame     | Passive | 0.41  | -0.28 | 1.09 |
| High          | Healthy | Desjardins-Crepau 2016   | Sequential   | CT      | -0.11 | -0.70 | 0.49 |
| High          | Healthy | Desjardins-Crepau 2016   | Sequential   | PE      | -0.01 | -0.64 | 0.63 |
| High          | Healthy | Desjardins-Crepau 2016   | Sequential   | Sham    | 0.05  | -0.56 | 0.66 |
| High          | Healthy | Shatil 2013              | Sequential   | CT      | -0.18 | -0.68 | 0.32 |
| High          | Healthy | Shatil 2013              | Sequential   | PE      | 0.26  | -0.25 | 0.76 |
| High          | Healthy | Shatil 2013              | Sequential   | Sham    | 0.29  | -0.22 | 0.81 |
| High          | Healthy | van het Reve 2014        | Sequential   | PE      | 0.15  | -0.20 | 0.51 |
| High          | Healthy | Reigal 2014              | Simultaneous | PE      | 0.18  | -0.33 | 0.69 |
| High          | MCI     | Anderson-Hanley 2018     | Exergame     | PE      | 0.06  | -0.97 | 1.08 |
| High          | MCI     | Barcelos 2015            | Exergame     | PE      | 0.79  | -0.26 | 1.85 |
| High          | MCI     | Damirchi 2018            | Sequential   | CT      | -0.29 | -1.07 | 0.49 |
| High          | MCI     | Damirchi 2018            | Sequential   | Passive | 0.26  | -0.57 | 1.09 |
| High          | MCI     | Damirchi 2018            | Sequential   | PE      | 0.25  | -0.54 | 1.03 |

## Appendix G. Results of individual studies and comparisons: Overall physical outcomes

| RoB           | Population | Study                    | Intervention | Control | Hedges's <i>g</i> | 95% Lower limit | 95% Upper limit |
|---------------|------------|--------------------------|--------------|---------|-------------------|-----------------|-----------------|
| Low           | Healthy    | Gschwind 2015            | Exergame     | Passive | -0.09             | -0.40           | 0.23            |
| Low           | Healthy    | Htut 2018                | Exergame     | Passive | 1.39              | 0.71            | 2.07            |
| Low           | Healthy    | Htut 2018                | Exergame     | PE      | -0.21             | -0.81           | 0.39            |
| Low           | Healthy    | Htut 2018                | Exergame     | Sham    | 0.32              | -0.28           | 0.93            |
| Low           | Healthy    | Schoene 2015             | Exergame     | Passive | 0.23              | -0.21           | 0.66            |
| Low           | Healthy    | Barnes 2013              | Sequential   | CT      | 0.01              | -0.48           | 0.49            |
| Low           | Healthy    | Barnes 2013              | Sequential   | PE      | -0.02             | -0.51           | 0.47            |
| Low           | Healthy    | Barnes 2013              | Sequential   | Sham    | -0.01             | -0.49           | 0.48            |
| Low           | Healthy    | McDaniel 2014            | Sequential   | CT      | 0.52              | -0.17           | 1.20            |
| Low           | Healthy    | McDaniel 2014            | Sequential   | PE      | 0.13              | -0.48           | 0.74            |
| Low           | Healthy    | McDaniel 2014            | Sequential   | Sham    | 0.40              | -0.24           | 1.05            |
| Low           | Healthy    | Romera-Liebana 2018      | Sequential   | Passive | 0.48              | 0.27            | 0.69            |
| Low           | Healthy    | ten Brinke 2019          | Sequential   | CT      | 0.12              | -0.33           | 0.56            |
| Low           | Healthy    | ten Brinke 2019          | Sequential   | Sham    | 0.07              | -0.37           | 0.51            |
| Low           | Healthy    | Boa Sorte Silva 2018     | Simultaneous | PE      | -0.30             | -0.65           | 0.05            |
| Low           | Healthy    | Kitazawa 2015            | Simultaneous | Passive | 1.33              | 0.78            | 1.89            |
| Low           | Healthy    | Nishiguchi 2015          | Simultaneous | Passive | 0.36              | -0.21           | 0.92            |
| Low           | MCI        | Delbroek 2017            | Exergame     | Passive | 0.18              | -0.74           | 1.09            |
| Low           | MCI        | Fiatarone Singh 2014     | Sequential   | CT      | 0.76              | 0.01            | 1.50            |
| Low           | MCI        | Fiatarone Singh 2014     | Sequential   | PE      | 0.03              | -0.76           | 0.82            |
| Low           | MCI        | Fiatarone Singh 2014     | Sequential   | Sham    | 0.67              | -0.04           | 1.38            |
| Some concerns | Healthy    | Adcock 2020              | Exergame     | Passive | 0.08              | -0.61           | 0.78            |
| Some concerns | Healthy    | Bacha 2018               | Exergame     | PE      | -0.15             | -0.72           | 0.43            |
| Some concerns | Healthy    | Eggenberger 2015         | Exergame     | PE      | -0.07             | -0.62           | 0.48            |
| Some concerns | Healthy    | Eggenberger 2016         | Exergame     | PE      | -0.11             | -0.79           | 0.57            |
| Some concerns | Healthy    | Maillot 2012             | Exergame     | Passive | 0.75              | 0.00            | 1.50            |
| Some concerns | Healthy    | Schattin 2016            | Exergame     | PE      | 0.04              | -0.70           | 0.78            |
| Some concerns | Healthy    | Fabre 2002               | Sequential   | CT      | 0.31              | -0.63           | 1.24            |
| Some concerns | Healthy    | Fabre 2002               | Sequential   | PE      | -0.13             | -1.06           | 0.80            |
| Some concerns | Healthy    | Fabre 2002               | Sequential   | Sham    | 0.28              | -0.66           | 1.21            |
| Some concerns | Healthy    | Linde 2014               | Sequential   | CT      | 0.23              | -0.52           | 0.97            |
| Some concerns | Healthy    | Linde 2014               | Sequential   | Passive | -0.07             | -0.78           | 0.64            |
| Some concerns | Healthy    | Linde 2014               | Sequential   | PE      | 0.23              | -0.45           | 0.92            |
| Some concerns | Healthy    | Rahe 2015                | Sequential   | CT      | 0.30              | -0.28           | 0.88            |
| Some concerns | Healthy    | Rahe 2015                | Sequential   | CT      | 0.16              | -0.43           | 0.75            |
| Some concerns | Healthy    | Eggenberger 2015         | Simultaneous | PE      | 0.06              | -0.50           | 0.63            |
| Some concerns | Healthy    | Hiyamizu 2012            | Simultaneous | PE      | 0.07              | -0.57           | 0.71            |
| Some concerns | Healthy    | Norouzi 2019             | Simultaneous | PE      | 0.47              | -0.15           | 1.08            |
| Some concerns | Healthy    | Norouzi 2019             | Simultaneous | Sham    | 0.96              | 0.32            | 1.60            |
| Some concerns | MCI        | Hughes 2014              | Exergame     | Sham    | 0.60              | -0.26           | 1.46            |
| Some concerns | MCI        | Stanmore 2019            | Exergame     | Passive | 0.22              | -0.19           | 0.62            |
| Some concerns | MCI        | Hagovska 2016            | Sequential   | PE      | 0.48              | 0.04            | 0.93            |
| Some concerns | MCI        | Combourieu Donnezan 2018 | Simultaneous | CT      | 0.42              | -0.23           | 1.07            |
| Some concerns | MCI        | Combourieu Donnezan 2018 | Simultaneous | Passive | 0.78              | 0.08            | 1.47            |

|               |         |                          |              |         |       |       |      |
|---------------|---------|--------------------------|--------------|---------|-------|-------|------|
| Some concerns | MCI     | Combourieu Donnezan 2018 | Simultaneous | PE      | 0.46  | -0.17 | 1.10 |
| Some concerns | MCI     | Park 2019                | Simultaneous | Passive | 0.14  | -0.41 | 0.70 |
| High          | Healthy | Schoene 2013             | Exergame     | Passive | 0.50  | -0.19 | 1.19 |
| High          | Healthy | Desjardins-Crepau 2016   | Sequential   | CT      | 0.22  | -0.39 | 0.83 |
| High          | Healthy | Desjardins-Crepau 2016   | Sequential   | PE      | 0.00  | -0.63 | 0.63 |
| High          | Healthy | Desjardins-Crepau 2016   | Sequential   | Sham    | 0.26  | -0.36 | 0.89 |
| High          | Healthy | van het Reve 2014        | Sequential   | PE      | 0.25  | -0.08 | 0.58 |
| High          | MCI     | Anderson-Hanley 2018     | Exergame     | PE      | -0.31 | -1.37 | 0.74 |

## Appendix H. Results of individual studies and comparisons: Overall psychosocial outcomes

| RoB           | Population | Study            | Intervention | Control | Hedges's <i>g</i> | 95% CI<br>Lower<br>limit | 95% CI<br>Upper<br>limit |
|---------------|------------|------------------|--------------|---------|-------------------|--------------------------|--------------------------|
| Low           | Healthy    | Gschwind 2015    | Exergame     | Passive | 0.08              | -0.24                    | 0.40                     |
| Low           | Healthy    | Schoene 2015     | Exergame     | Passive | 0.27              | -0.17                    | 0.70                     |
| Low           | Healthy    | Barnes 2013      | Sequential   | CT      | 0.12              | -0.38                    | 0.61                     |
| Low           | Healthy    | Barnes 2013      | Sequential   | PE      | 0.31              | -0.18                    | 0.80                     |
| Low           | Healthy    | Barnes 2013      | Sequential   | Sham    | 0.08              | -0.41                    | 0.56                     |
| Low           | Healthy    | Kitazawa 2015    | Simultaneous | Passive | -0.06             | -0.56                    | 0.44                     |
| Some concerns | Healthy    | Eggenberger 2015 | Exergame     | PE      | 0.03              | -0.52                    | 0.58                     |
| Some concerns | Healthy    | Eggenberger 2016 | Exergame     | PE      | -0.04             | -0.72                    | 0.63                     |
| Some concerns | Healthy    | Eggenberger 2015 | Simultaneous | PE      | -0.09             | -0.65                    | 0.48                     |
| Some concerns | MCI        | Stanmore 2019    | Exergame     | Passive | 0.10              | -0.31                    | 0.51                     |
| Some concerns | MCI        | Hagovska 2016    | Sequential   | PE      | 1.80              | 1.28                     | 2.31                     |
| Some concerns | MCI        | Park 2019        | Simultaneous | Passive | 0.27              | -0.29                    | 0.82                     |

## Appendix I. Results of individual studies and comparisons: Dementia and Parkinson's disease

| RoB                                  | Population | Study             | Intervention | Control | Hedges's g | 95% CI Lower limit | 95% CI Upper limit |
|--------------------------------------|------------|-------------------|--------------|---------|------------|--------------------|--------------------|
| <i>Overall cognitive outcomes</i>    |            |                   |              |         |            |                    |                    |
| Low                                  | Dementia   | Karssemeijer 2019 | Exergame     | PE      | -0.02      | -0.49              | 0.46               |
| Low                                  | Dementia   | Karssemeijer 2019 | Exergame     | Sham    | 0.21       | -0.26              | 0.68               |
| Low                                  | Dementia   | Rezola-Pardo 2019 | Simultaneous | PE      | 0.00       | -0.47              | 0.47               |
| Low                                  | Parkinson  | Pompeu 2012       | Exergame     | PE      | 0.04       | -0.63              | 0.72               |
| Low                                  | Parkinson  | Song 2018         | Exergame     | Passive | 0.19       | -0.34              | 0.72               |
| <i>Overall physical outcomes</i>     |            |                   |              |         |            |                    |                    |
| Low                                  | Dementia   | Rezola-Pardo 2019 | Simultaneous | PE      | -0.06      | -0.53              | 0.41               |
| Low                                  | Parkinson  | Pompeu 2012       | Exergame     | PE      | 0.10       | -0.57              | 0.78               |
| Low                                  | Parkinson  | Song 2018         | Exergame     | Passive | -0.15      | -0.68              | 0.38               |
| <i>Overall psychosocial outcomes</i> |            |                   |              |         |            |                    |                    |
| Low                                  | Dementia   | Rezola-Pardo 2019 | Simultaneous | PE      | -0.35      | -0.83              | 0.13               |

## Appendix J. Distribution of potential effect modifiers

| STUDY INFORMATION       |                          | POPULATION CHARACTERISTICS |      |                           | INTERVENTION        |              | Risk of Bias  |
|-------------------------|--------------------------|----------------------------|------|---------------------------|---------------------|--------------|---------------|
| Comparison              | Study                    | Population                 | Age  | MMSE<br>(or equivalent)   | Duration<br>(weeks) | Delivery     |               |
| Exg vs PC               | Adcock 2020              | Healthy                    | 73.9 | 29.05                     | 16                  | Unsupervised | Some concerns |
| Exg vs PE               | Anderson-Hanley 2018     | MCI                        | 78.1 | 21.8 (MoCA)               | 24                  | Supervised   | High          |
| Exg vs PE               | Bacha 2018               | Healthy                    | 68   | 23.0 (MoCA)               | 7                   | Supervised   | Some concerns |
| Seq vs CT vs PE vs Sham | Barban 2017              | Healthy                    | 75.0 | ≥20                       | 12                  | Supervised   | Low           |
| Exg vs PE               | Barcelos 2015            | MCI                        | 85.1 | 22.6 (MoCA)               | 12                  | Supervised   | High          |
| Seq vs CT vs PE vs Sham | Barnes 2013              | Healthy                    | 73.4 | 28.34 (3MSE) <sup>a</sup> | 12                  | Supervised   | Low           |
| Sim vs PE               | Boa Sorte Silva 2018     | Healthy                    | 67.5 | 29.1                      | 24                  | Supervised   | Low           |
| Sim vs CT vs PE vs PC   | Combourieu Donnezan 2018 | MCI                        | 76.7 | 27.78                     | 12                  | Supervised   | Some concerns |
| Seq vs CT vs PE vs PC   | Damirchi 2018            | MCI                        | 68.3 | 23.43                     | 8                   | Supervised   | High          |
| Exg vs PC               | Delbroek 2017            | MCI                        | 87.2 | 17.25 (MoCA)              | 6                   | Supervised   | Low           |
| Seq vs CT vs PE vs Sham | Desjardin-Crepeau 2016   | Healthy                    | 72.4 | 28.89                     | 12                  | Supervised   | High          |
| Exg vs Sim vs PE        | Eggenberger 2015         | Healthy                    | 78.9 | 28.23                     | 26                  | Supervised   | Some concerns |
| Exg vs PE               | Eggenberger 2016         | Healthy                    | 74.9 | 26.24 (MoCA)              | 8                   | Supervised   | Some concerns |
| Seq vs CT vs PE vs Sham | Fabre 2002               | Healthy                    | 65.9 | Nr                        | 8                   | Supervised   | Some concerns |
| Seq vs CT vs PE vs Sham | Fiatarone Singh 2014     | MCI                        | 70.1 | 27                        | 26                  | Supervised   | Low           |
| Exg vs PC               | Gschwind 2015            | Healthy                    | 74.7 | Nr                        | 16                  | Unsupervised | Low           |
| Seq vs PE               | Hagovska 2016            | MCI                        | 67   | 26.4                      | 10                  | Supervised   | Some concerns |
| Sim vs PE               | Hiyamizu 2012            | Healthy                    | 72   | Nr                        | 12                  | Supervised   | Some concerns |
| Exg vs Sham             | Hughes 2014              | MCI                        | 77.4 | 27.2                      | 24                  | Supervised   | Some concerns |
| Sim vs PC               | Kitazawa 2015            | Healthy                    | 76.4 | Nr                        | 8                   | Supervised   | Low           |
| Seq vs CT vs PE vs Sham | Legault 2011             | Healthy                    | 76.4 | 28.41 (3MSE) <sup>a</sup> | 16                  | Supervised   | Low           |
| Seq vs CT vs PE vs PC   | Linde 2014               | Healthy                    | 67.1 | Nr                        | 16                  | Supervised   | Some concerns |
| Seq vs PC               | Maffei 2017              | MCI                        | 74.5 | 25.6                      | 28                  | Supervised   | Low           |
| Exg vs PC               | Maillot 2012             | Healthy                    | 73.5 | 28.97                     | 12                  | Supervised   | Some concerns |
| Seq vs CT vs PE vs Sham | McDaniel 2014            | Healthy                    | 65   | 29                        | 24                  | Supervised   | Low           |
| Sim vs PC               | Mrakic-Sposta 2018       | MCI                        | 73.3 | 23                        | 6                   | Supervised   | Some concerns |
| Sim vs PC               | Nishiguchi 2015          | Healthy                    | 73.2 | 27.6                      | 12                  | Supervised   | Low           |
| Sim vs PE vs Sham       | Norouzi 2019             | Healthy                    | 68.3 | 26.3                      | 4                   | Supervised   | Some concerns |
| Sim vs PC               | Park 2019                | MCI                        | 71.6 | 24.5                      | 24                  | Supervised   | Some concerns |
| Seq vs CT               | Rahe 2015 Study 1        | Healthy                    | 68.4 | Nr                        | 7                   | Supervised   | Some concerns |

|                         |                     |         |      |                            |    |              |               |
|-------------------------|---------------------|---------|------|----------------------------|----|--------------|---------------|
| Seq vs CT               | Rahe 2015 Study 2   | Healthy | 68.4 | Nr                         | 7  | Supervised   | Some concerns |
| Sim vs PE               | Reigal 2014         | Healthy | 66.1 | Nr                         | 20 | Supervised   | High          |
| Seq vs PC               | Romera-Liebana 2018 | Healthy | 77.3 | 26.5 (MEC-35) <sup>a</sup> | 12 | Supervised   | Low           |
| Exg vs PE               | Schattin 2016       | Healthy | 80   | 28.74                      | 8  | Supervised   | Some concerns |
| Exg vs PC               | Schoene 2013        | Healthy | 77.9 | 28.85                      | 8  | Unsupervised | High          |
| Exg vs PC               | Schoene 2015        | Healthy | 81.5 | Nr                         | 16 | Unsupervised | Low           |
| Seq vs CT vs PE vs Sham | Shatil 2013         | Healthy | 79.8 | >24                        | 16 | Supervised   | High          |
| Sim vs Sham             | Shimada 2018        | MCI     | 71.6 | 26.7                       | 40 | Supervised   | Low           |
| Exg vs PC               | Stanmore 2019       | MCI     | 77.8 | Nr                         | 12 | Supervised   | Some concerns |
| Seq vs CT vs Sham       | ten Brinke 2019     | Healthy | 72.2 | 28.6                       | 8  | Supervised   | Low           |
| Seq vs PE               | van het Reve 2014   | Healthy | 81.5 | 27.65                      | 12 | Supervised   | High          |

<sup>a</sup> Converted to a 0-30 scale

Exg = exergaming. CT = cognitive training. MCI = mild cognitive impairment. MEC-35 = Mini-Examination Cognitive of Lobo. MMSE = Mini-Mental State Examination. MoCA = Montreal Cognitive Assessment. PC = passive control. PE = physical exercise. Seq = sequential training. Sham = sham intervention. Sim = simultaneous training. 3MSE = Modified Mini-Mental State Examination.

## Appendix K. CINeMA grading of the certainty of the evidence

We evaluated the certainty of the evidence for the network meta-analysis using the CINeMA web application (Papakonstantinou, Nikolakopoulou, Higgins, Egger, & Salanti, 2020), applying the following criteria:

**Within-study bias:** The overall risk of bias assessment for each study was combined with the percentage contribution matrix to compute the percentage contribution for each comparison from studies with a low, some concerns and high risk of bias. The overall assessment for each comparison was based on the average risk of bias of the contributing studies.

**Reporting bias:** No asymmetry was detected in the funnel plot and no significant association was found between study precision and effect size for cognitive or physical outcomes. Consequently, reporting bias was set as “undetected” for all comparisons.

**Indirectness:** All of the included studies matched the study question and visual inspection of potential effect modifiers showed that these were similarly distributed across the network of included comparisons. However, four studies used unsupervised training, all of which compared exergaming with passive control. These studies were therefore downgraded to “moderate” indirectness. All other studies were set as “low” indirectness.

**Imprecision, heterogeneity and incoherence:** We considered a clinically meaningful threshold for SMD to be 0.20.

### Certainty of the evidence for cognitive outcomes

| Comparison  | Number of studies | Within-study bias | Reporting bias | Indirectness | Imprecision   | Heterogeneity | Incoherence | Confidence rating |
|-------------|-------------------|-------------------|----------------|--------------|---------------|---------------|-------------|-------------------|
| CT:PE       | 11                | Some concerns     | Undetected     | No concerns  | Some concerns | No concerns   | No concerns | Low               |
| CT:Passive  | 3                 | Some concerns     | Undetected     | No concerns  | No concerns   | No concerns   | No concerns | Moderate          |
| CT:Seq      | 13                | Some concerns     | Undetected     | No concerns  | No concerns   | No concerns   | No concerns | Moderate          |
| CT:Sham     | 9                 | No concerns       | Undetected     | No concerns  | No concerns   | No concerns   | No concerns | High              |
| CT:Sim      | 1                 | Some concerns     | Undetected     | No concerns  | Some concerns | No concerns   | No concerns | Low               |
| Exg:PE      | 6                 | Some concerns     | Undetected     | No concerns  | No concerns   | No concerns   | No concerns | Moderate          |
| Exg:Passive | 7                 | Some concerns     | Undetected     | No concerns  | No concerns   | No concerns   | No concerns | Moderate          |
| Exg:Sham    | 1                 | Some concerns     | Undetected     | No concerns  | Some concerns | No concerns   | No concerns | Low               |
| Exg:Sim     | 1                 | Some concerns     | Undetected     | No concerns  | No concerns   | No concerns   | No concerns | Moderate          |
| Passive:PE  | 3                 | Some concerns     | Undetected     | No concerns  | No concerns   | No concerns   | No concerns | Moderate          |
| PE:Seq      | 12                | Some concerns     | Undetected     | No concerns  | No concerns   | No concerns   | No concerns | Moderate          |



|              |   |               |            |             |               |             |             |                 |
|--------------|---|---------------|------------|-------------|---------------|-------------|-------------|-----------------|
| PE:Sham      | 9 | Some concerns | Undetected | No concerns | Some concerns | No concerns | No concerns | <b>Low</b>      |
| PE:Sim       | 6 | Some concerns | Undetected | No concerns | No concerns   | No concerns | No concerns | <b>Moderate</b> |
| Passive:Seq  | 4 | No concerns   | Undetected | No concerns | No concerns   | No concerns | No concerns | <b>High</b>     |
| Passive:Sim  | 5 | Some concerns | Undetected | No concerns | No concerns   | No concerns | No concerns | <b>Moderate</b> |
| Seq:Sham     | 9 | No concerns   | Undetected | No concerns | No concerns   | No concerns | No concerns | <b>High</b>     |
| Sham:Sim     | 2 | No concerns   | Undetected | No concerns | No concerns   | No concerns | No concerns | <b>High</b>     |
| CT:Exg       | 0 | Some concerns | Undetected | No concerns | Some concerns | No concerns | No concerns | <b>Low</b>      |
| Exg:Seq      | 0 | Some concerns | Undetected | No concerns | Some concerns | No concerns | No concerns | <b>Low</b>      |
| Passive:Sham | 0 | No concerns   | Undetected | No concerns | Some concerns | No concerns | No concerns | <b>Moderate</b> |
| Seq:Sim      | 0 | Some concerns | Undetected | No concerns | Some concerns | No concerns | No concerns | <b>Low</b>      |

### Certainty of the evidence for physical outcomes

| Comparison  | Number of studies | Within-study bias | Reporting bias | Indirectness | Imprecision   | Heterogeneity | Incoherence   | Confidence rating |
|-------------|-------------------|-------------------|----------------|--------------|---------------|---------------|---------------|-------------------|
| CT:PE       | 7                 | Some concerns     | Undetected     | No concerns  | No concerns   | Some concerns | No concerns   | <b>Low</b>        |
| CT:Passive  | 2                 | Some concerns     | Undetected     | No concerns  | Some concerns | Some concerns | No concerns   | <b>Very low</b>   |
| CT:Seq      | 9                 | Some concerns     | Undetected     | No concerns  | No concerns   | No concerns   | Some concerns | <b>Low</b>        |
| CT:Sham     | 6                 | No concerns       | Undetected     | No concerns  | Some concerns | Some concerns | No concerns   | <b>Low</b>        |
| CT:Sim      | 1                 | Some concerns     | Undetected     | No concerns  | No concerns   | Some concerns | No concerns   | <b>Low</b>        |
| Exg:PE      | 5                 | Some concerns     | Undetected     | No concerns  | Some concerns | No concerns   | No concerns   | <b>Low</b>        |
| Exg:Passive | 7                 | Some concerns     | Undetected     | No concerns  | No concerns   | Some concerns | No concerns   | <b>Low</b>        |
| Exg:Sham    | 1                 | Some concerns     | Undetected     | No concerns  | Some concerns | Some concerns | No concerns   | <b>Very low</b>   |
| Exg:Sim     | 1                 | Some concerns     | Undetected     | No concerns  | Some concerns | No concerns   | No concerns   | <b>Low</b>        |
| Passive:PE  | 2                 | Some concerns     | Undetected     | No concerns  | No concerns   | No concerns   | No concerns   | <b>Moderate</b>   |
| PE:Seq      | 8                 | Some concerns     | Undetected     | No concerns  | Some concerns | No concerns   | No concerns   | <b>Low</b>        |
| PE:Sham     | 6                 | Some concerns     | Undetected     | No concerns  | No concerns   | Some concerns | No concerns   | <b>Low</b>        |
| PE:Sim      | 5                 | Some concerns     | Undetected     | No concerns  | Some concerns | No concerns   | No concerns   | <b>Low</b>        |
| Passive:Seq | 2                 | No concerns       | Undetected     | No concerns  | No concerns   | No concerns   | No concerns   | <b>High</b>       |
| Passive:Sim | 4                 | Some concerns     | Undetected     | No concerns  | No concerns   | No concerns   | No concerns   | <b>Moderate</b>   |
| Seq:Sham    | 6                 | Some concerns     | Undetected     | No concerns  | No concerns   | No concerns   | Some concerns | <b>Low</b>        |
| Sham:Sim    | 1                 | Some concerns     | Undetected     | No concerns  | No concerns   | No concerns   | Some concerns | <b>Low</b>        |
| CT:Exg      | 0                 | Some concerns     | Undetected     | No concerns  | Some concerns | Some concerns | No concerns   | <b>Very low</b>   |
| Exg:Seq     | 0                 | Some concerns     | Undetected     | No concerns  | Some concerns | No concerns   | No concerns   | <b>Low</b>        |

|              |   |               |            |             |                |               |             |                 |
|--------------|---|---------------|------------|-------------|----------------|---------------|-------------|-----------------|
| Passive:Sham | 0 | Some concerns | Undetected | No concerns | Some concerns  | Some concerns | No concerns | <b>Very low</b> |
| Seq:Sim      | 0 | Some concerns | Undetected | No concerns | Major concerns | No concerns   | No concerns | <b>Very low</b> |

## Appendix L. Sensitivity analyses

### Excluding studies with a high risk of bias

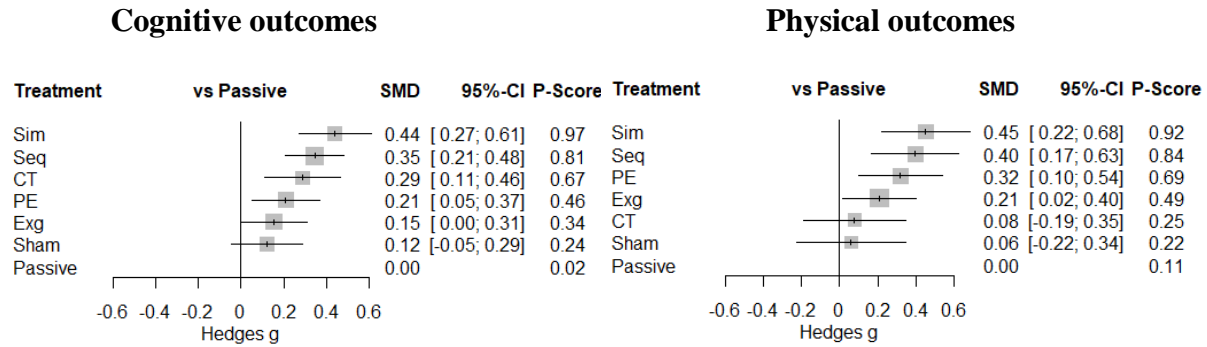

### Cognitively healthy older adults

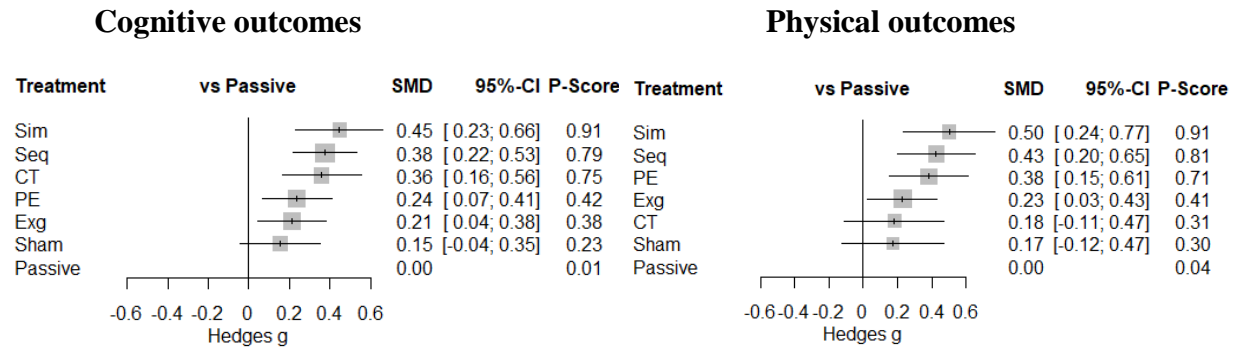

### Participants with MCI

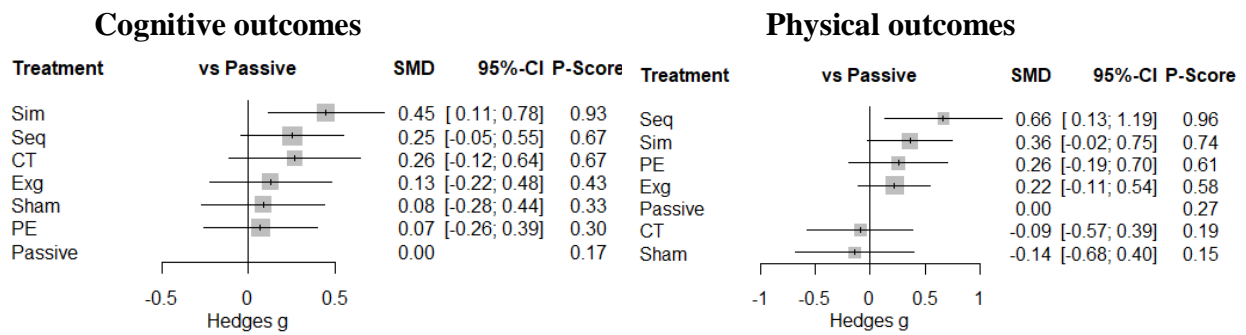

Source: https://medrxiv.org/content/10.1101/2020.08.08.20170654v2.full.pdf
